# Supplementary material for: miRNAome expression profiles in the gonads of adultMelopsittacus undulatus
Source: PeerJ journal article supplement (doi:10.7717/peerj.4615), 2018-04-09

Supplemental Figure S1. RNA integrity number analysis by Agilent Bioanalyzer (Testes marked as A, B, C; ovaries marked as 1, 2, 3).

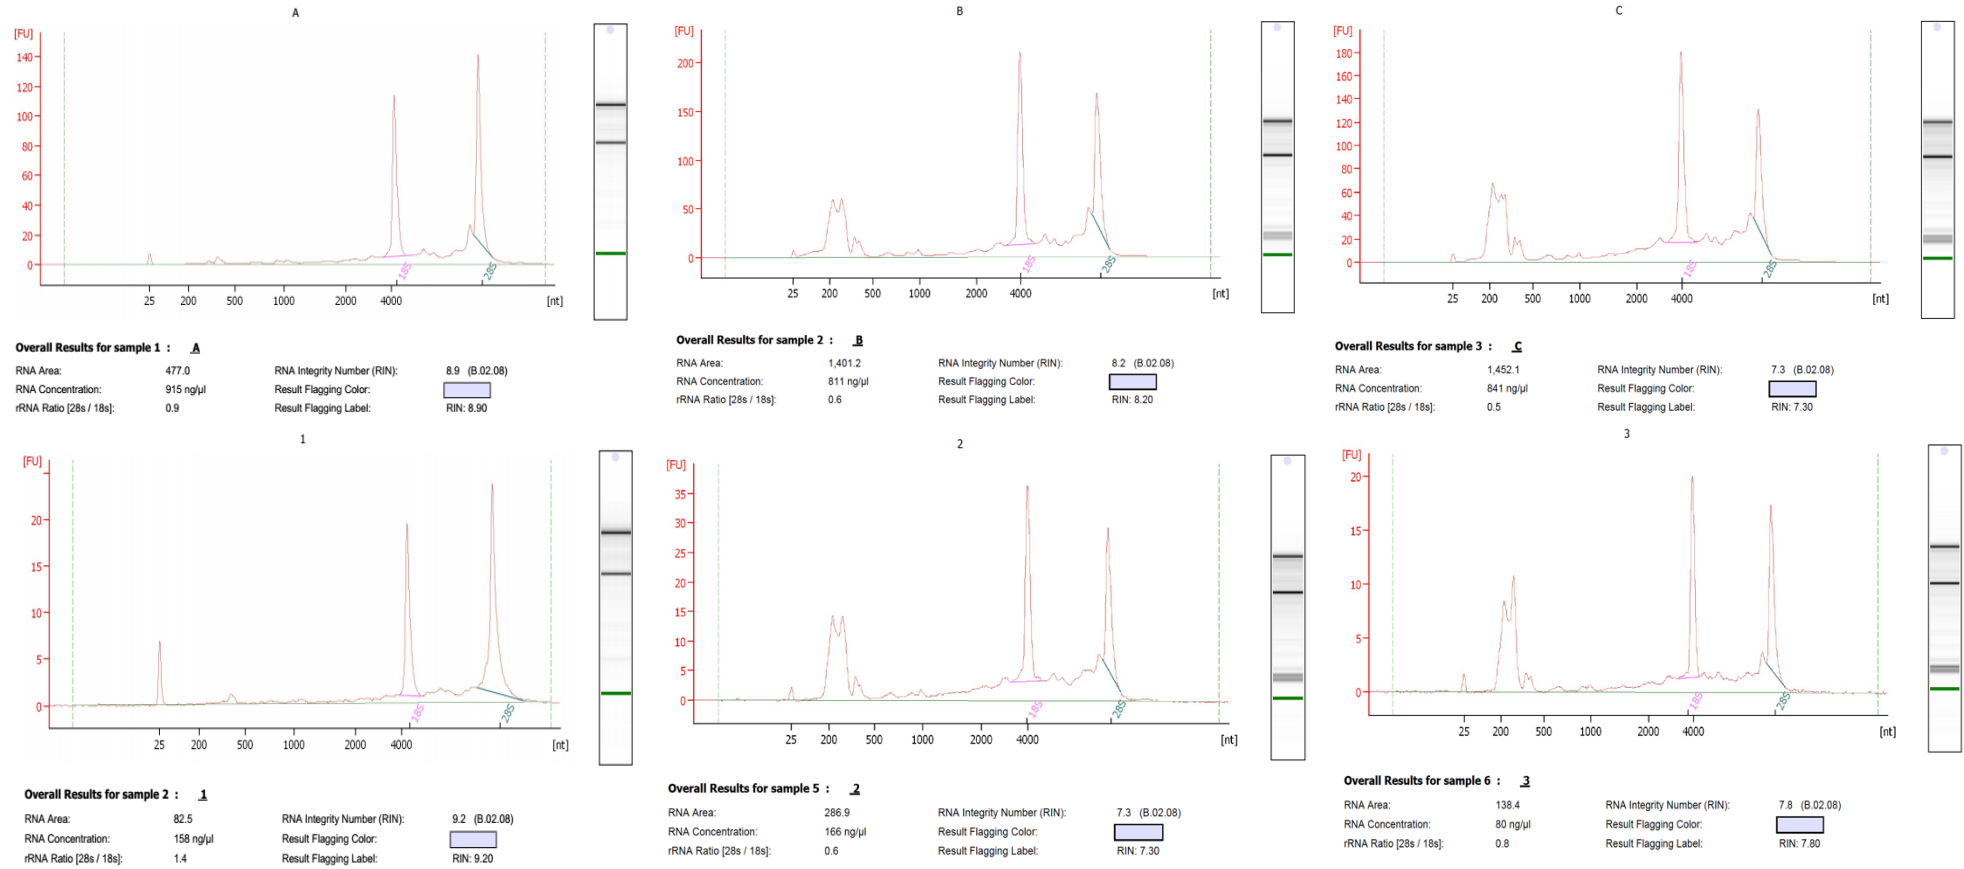

Supplement: Supplemental_Figure_S1.pdf [file Supplemental_Figure_S1.pdf]
