# Supplementary material for: miRNAome expression profiles in the gonads of adult Melopsittacus undulatus
Source: PeerJ. 2018 Apr 9;6:e4615. doi: 10.7717/peerj.4615 (PMC5896495; doi:10.7717/peerj.4615)
Supplement: Table S4 [file peerj-06-4615-s004.xlsx]

## Sheet: sort_by_miRNA_name
Supplemental Table S4. The list of predicted multiple miRNAs target genes.
miRNA name	Description	Gene symbol
mun-miR-194-5p	alpha/beta hydrolase domain-containing protein 17C	ABHD17C
mun-miR-194-5p	actin-binding LIM protein 1	ABLIM1
mun-miR-194-5p	acyl-CoA-binding domain-containing protein 5	ACBD5
mun-miR-194-5p	uncharacterized aarF domain-containing protein kinase 1	ADCK1
mun-miR-194-5p	ankyrin repeat domain-containing protein 10	ANKRD10
mun-miR-194-5p	anoctamin-10	ANO10
mun-miR-194-5p	AP-1 complex subunit mu-1	AP1M1
mun-miR-194-5p	AP-2 complex subunit mu	AP2M1
mun-miR-194-5p	aquaporin-4	AQP4
mun-miR-194-5p	E3 ubiquitin-protein ligase ARIH1	ARIH1
mun-miR-194-5p	arf-GAP with SH3 domain, ANK repeat and PH domain-containing protein 1	ASAP1
mun-miR-194-5p	cysteine protease ATG4A	ATG4A
mun-miR-194-5p	antithrombin-III	ATIII
mun-miR-194-5p	B-cell CLL/lymphoma 9 protein	BCL9
mun-miR-194-5p	biorientation of chromosomes in cell division protein 1	BOD1
mun-miR-194-5p	basic leucine zipper and W2 domain-containing protein 1	BZW1
mun-miR-194-5p	C15orf41	C15orf41
mun-miR-194-5p	UPF0468 protein C16orf80	C16orf80
mun-miR-194-5p	UPF0532 protein C7orf60	C7orf60
mun-miR-194-5p	calmodulin	CaM
mun-miR-194-5p	calmodulin-regulated spectrin-associated protein 1	CAMSAP1
mun-miR-194-5p	coiled-coil domain-containing protein 6	CCDC6
mun-miR-194-5p	CD151 antigen	CD151
mun-miR-194-5p	cell division control protein 42	CDC42ÃŠ
mun-miR-194-5p	cofilin-2	CFL2
mun-miR-194-5p	chromodomain-helicase-DNA-binding protein 4	CHD4
mun-miR-194-5p	cholinephosphotransferase 1	CHPT1
mun-miR-194-5p	chemokine-like factor	CKLF
mun-miR-194-5p	creatine kinase U-type, mitochondrial	CKMT1A
mun-miR-194-5p	dual specificity protein kinase CLK4	CLK4
mun-miR-194-5p	connector enhancer of kinase suppressor of ras 3	CNKSR3
mun-miR-194-5p	cAMP-responsive element-binding protein-like 2	CREBL2
mun-miR-194-5p	stromal cell-derived factor 1	CXCL12
mun-miR-194-5p	lipoamide acyltransferase component of branched-chain alpha-keto acid dehydrogenase complex, mitochondrial	DBT
mun-miR-194-5p	DCN1-like protein 4	DCUN1D4
mun-miR-194-5p	desumoylating isopeptidase 2	DESI2
mun-miR-194-5p	probable 2-oxoglutarate dehydrogenase E1 component DHKTD1, mitochondrial	DHTKD1
mun-miR-194-5p	dnaJ subfamily C member 18	DNAJC18
mun-miR-194-5p	dystrobrevin alpha	DTNA
mun-miR-194-5p	cytoplasmic dynein 1 light intermediate chain 2	DYNC1LI2
mun-miR-194-5p	dynein light chain Tctex-type 1	DYNLT1
mun-miR-194-5p	ELL-associated factor 1	EAF1
mun-miR-194-5p	transcription factor COE1	EBF1
mun-miR-194-5p	zinc phosphodiesterase ELAC protein 1	ELAC1
mun-miR-194-5p	ETS-related transcription factor Elf-2	ELF2
mun-miR-194-5p	ephrin type-A receptor 5	EPHA5
mun-miR-194-5p	protein ERGIC-53	ERGIC53
mun-miR-194-5p	protein FAM110B	FAM110B
mun-miR-194-5p	membrane protein FAM159A	FAM159A
mun-miR-194-5p	protein FAM19A2	FAM19A2
mun-miR-194-5p	protein fem-1 C	FEM1C
mun-miR-194-5p	putative ribosomal RNA methyltransferase 2	FTSJ2
mun-miR-194-5p	growth arrest-specific protein 7	GAS7
mun-miR-194-5p	ganglioside-induced differentiation-associated protein 2	GDAP2
mun-miR-194-5p	glutaminase kidney isoform, mitochondrial	GLS
mun-miR-194-5p	guanine nucleotide-binding protein G(I)/G(S)/G(O) subunit gamma-10	GNG10
mun-miR-194-5p	glucosamine-6-phosphate isomerase 2	GNPDA2
mun-miR-194-5p	alanine aminotransferase 2	GPT2
mun-miR-194-5p	glutamate receptor 4	GRIA4
mun-miR-194-5p	HEAT repeat-containing protein 1	HEATR1
mun-miR-194-5p	3-hydroxyisobutyrate dehydrogenase, mitochondrial	HIBADH
mun-miR-194-5p	homeobox protein Hox-D10	HOXD10
mun-miR-194-5p	heterochromatin protein 1-binding protein 3	HP1BP3
mun-miR-194-5p	serine protease HTRA1	HTRA1
mun-miR-194-5p	IQ motif and SEC7 domain-containing protein 1	IQSEC1
mun-miR-194-5p	integrin alpha-9	ITGA9
mun-miR-194-5p	lysine-specific demethylase 2B	KDM2B
mun-miR-194-5p	lysine-specific demethylase 6A	KDM6A
mun-miR-194-5p	KH domain-containing, RNA-binding, signal transduction-associated protein 2	KHDRBS2
mun-miR-194-5p	mast/stem cell growth factor receptor Kit	KIT
mun-miR-194-5p	lysosome-associated membrane glycoprotein 1	LAMP1
mun-miR-194-5p	glycosyltransferase-like protein LARGE1	LARGE1
mun-miR-194-5p	low-density lipoprotein receptor-related protein 12	LRP12
mun-miR-194-5p	target of rapamycin complex 2 subunit MAPKAP1	MAPKAP1
mun-miR-194-5p	S-adenosylmethionine synthase isoform type-1	MAT1A
mun-miR-194-5p	muscleblind-like protein 2	MBNL2
mun-miR-194-5p	mediator of RNA polymerase II transcription subunit 23	MED23
mun-miR-194-5p	homeobox protein Meis2	MEIS2
mun-miR-194-5p	hippocampus abundant transcript 1 protein	MFSD14A
mun-miR-194-5p	histone-lysine N-methyltransferase MLL3	MLL3
mun-miR-194-5p	metallophosphoesterase domain-containing protein 1	MPPED1
mun-miR-194-5p	myosin-11	MYO10
mun-miR-194-5p	unconventional myosin-Va	MYO5A
mun-miR-194-5p	nuclear receptor corepressor 1	NCOR1
mun-miR-194-5p	protein NDRG1	NDRG1
mun-miR-194-5p	protein NDRG1	NDRG1
mun-miR-194-5p	nuclear receptor subfamily 4 group A member 3	NR4A3
mun-miR-194-5p	NT-3 growth factor receptor	NTRK3
mun-miR-194-5p	origin recognition complex subunit 5	ORAOV5
mun-miR-194-5p	polyadenylate-binding protein-interacting protein 2	PAIP2
mun-miR-194-5p	partitioning defective 3	PARD3
mun-miR-194-5p	[Pyruvate dehydrogenase [acetyl-transferring]]-phosphatase 2, mitochondrial	PDP2
mun-miR-194-5p	prohibitin-2	PHB2
mun-miR-194-5p	PHD finger protein 20	PHF20
mun-miR-194-5p	pyridoxal phosphate phosphatase PHOSPHO2	PHOSPHO2
mun-miR-194-5p	podocan	PODN
mun-miR-194-5p	protein phosphatase 1 regulatory subunit 12A	PPP1R12A
mun-miR-194-5p	peroxiredoxin-6	PRDX6
mun-miR-194-5p	prickle-like protein 1	PRICKLE1
mun-miR-194-5p	serine/threonine-protein kinase D1	PRKD1
mun-miR-194-5p	26S protease regulatory subunit 4	PSMC1
mun-miR-194-5p	tyrosine-protein phosphatase non-receptor type 4	PTPN4
mun-miR-194-5p	ras-related protein Rab-8B	RAB8B
mun-miR-194-5p	ras-related protein Ral-A	RALA
mun-miR-194-5p	rap guanine nucleotide exchange factor 2	RAPGEF2
mun-miR-194-5p	regulatory factor X-associated protein	RFXAP
mun-miR-194-5p	round spermatid basic protein 1-like protein	RSBN1L
mun-miR-194-5p	RUN and FYVE domain-containing protein 1	RUFY1
mun-miR-194-5p	sal-like protein 1	SALL1
mun-miR-194-5p	sal-like protein 3	SALL3
mun-miR-194-5p	protein strawberry notch 1	SBNO1
mun-miR-194-5p	syntenin-1	SDCBP
mun-miR-194-5p	endophilin-B2	SH3GLB2
mun-miR-194-5p	zinc transporter ZIP13	SLC39A13
mun-miR-194-5p	protein SMG8	SMG8
mun-miR-194-5p	small integral membrane protein 14	SMIM14
mun-miR-194-5p	sorting nexin-10	SNX10
mun-miR-194-5p	spermatogenesis-defective protein 39	SPATA39
mun-miR-194-5p	splicing regulatory glutamine/lysine-rich protein 1	SREK1
mun-miR-194-5p	protein SSXT	SSXT
mun-miR-194-5p	small ubiquitin-related modifier 2	SUMO2
mun-miR-194-5p	polycomb protein SUZ12	SUZ12
mun-miR-194-5p	heterogeneous nuclear ribonucleoprotein Q	SYNCRIP
mun-miR-194-5p	mitochondrial import inner membrane translocase subunit TIM14	TIMM14
mun-miR-194-5p	mitochondrial import inner membrane translocase subunit Tim23	TIMM23
mun-miR-194-5p	cell cycle control protein 50A	TMEM30A
mun-miR-194-5p	traf2 and NCK-interacting protein kinase	TNIK
mun-miR-194-5p	tripeptidyl-peptidase 2	TPP2
mun-miR-194-5p	tetratricopeptide repeat protein 7B	TTC7B
mun-miR-194-5p	tyrosine-protein kinase receptor TYRO3	TYRO3
mun-miR-194-5p	SUMO-conjugating enzyme UBC9	UBE2I
mun-miR-194-5p	uridine 5'-monophosphate synthase	UMPS
mun-miR-194-5p	ubiquitin carboxyl-terminal hydrolase 25	USP25
mun-miR-194-5p	vesicle-associated membrane protein-associated protein A	VAPA
mun-miR-194-5p	deubiquitinating protein VCIP135	VCPIP1
mun-miR-194-5p	transcription cofactor vestigial-like protein 4	VGLL4
mun-miR-194-5p	WW domain-binding protein 4	WBP4
mun-miR-194-5p	ATP-dependent zinc metalloprotease YME1L1	YME1L1
mun-miR-194-5p	ATP-dependent zinc metalloprotease YME1L1	YME1L1
mun-miR-194-5p	YTH domain family protein 1	YTHDF1
mun-miR-194-5p	zinc finger protein ZIC 1	ZIC1
mun-miR-194-5p	zinc finger protein 827	ZNF827
mun-miR-203-5p	[Protein ADP-ribosylarginine] hydrolase-like protein 1	ADPRHL1
mun-miR-203-5p	amyloid protein-binding protein 2	APPBP2
mun-miR-203-5p	baculoviral IAP repeat-containing protein 6	BIRC6
mun-miR-203-5p	C9orf171	C9orf171
mun-miR-203-5p	peripheral plasma membrane protein CASK	CASK
mun-miR-203-5p	calsyntenin-1	CLSTN1
mun-miR-203-5p	cold shock domain-containing protein E1	CSDE1
mun-miR-203-5p	casein kinase I isoform gamma-1	CSNK1G1
mun-miR-203-5p	dachshund 1	DACH1
mun-miR-203-5p	DENN domain-containing protein 2A	DENND2A
mun-miR-203-5p	ER membrane protein complex subunit 6	EMC1
mun-miR-203-5p	fibrillin-2	FBN2
mun-miR-203-5p	forkhead box protein P2	FOXP2
mun-miR-203-5p	GRB2-associated-binding protein 1	GAB1
mun-miR-203-5p	glutamate receptor 1	GRIA1
mun-miR-203-5p	nucleolar complex protein 3	NOC3L
mun-miR-203-5p	PAB-dependent poly(A)-specific ribonuclease subunit 3	PAN3
mun-miR-203-5p	high affinity cAMP-specific 3',5'-cyclic phosphodiesterase 7A	PDE7A
mun-miR-203-5p	[Pyruvate dehydrogenase [acetyl-transferring]]-phosphatase 2, mitochondrial	PDP2
mun-miR-203-5p	ras-related protein Rab-4A	RAB4A
mun-miR-203-5p	GTP-binding protein RAD	RAD
mun-miR-203-5p	RNA-binding protein 39	RBM39
mun-miR-203-5p	DNA-directed RNA polymerases I and III subunit RPAC1	RPAC1
mun-miR-203-5p	SERTA domain-containing protein 2	SERTAD2
mun-miR-203-5p	SRSF protein kinase 2	SRPK2
mun-miR-203-5p	suppression of tumorigenicity 5 protein	ST5
mun-miR-203-5p	tectonic-2	TCTN2
mun-miR-203-5p	TGF-beta receptor type-1	TGFBR1
mun-miR-203-5p	regulator of nonsense transcripts 2	UPF2
mun-miR-203-5p	14-3-3 protein epsilon	YWHAE
mun-miR-215-5p	thioredoxin-like protein AAED1	AAED1
mun-miR-215-5p	activity-dependent neuroprotector homeobox protein	ADNP
mun-miR-215-5p	brefeldin A-inhibited guanine nucleotide-exchange protein 1	ARFGEF1
mun-miR-215-5p	cyclin-C	CCNC
mun-miR-215-5p	nuclear envelope phosphatase-regulatory subunit 1	CNEP1R1
mun-miR-215-5p	putative tyrosine-protein phosphatase auxilin	DNAJC6
mun-miR-215-5p	dystrobrevin beta	DTNB
mun-miR-215-5p	cytoplasmic dynein 1 heavy chain 1	DYNC1H1
mun-miR-215-5p	proepiregulin	EREG
mun-miR-215-5p	fibroblast growth factor 13	FGF13
mun-miR-215-5p	polyphosphoinositide phosphatase	FIG4
mun-miR-215-5p	polypeptide N-acetylgalactosaminyltransferase 3	GALNT3
mun-miR-215-5p	myosin-10	MYO10
mun-miR-215-5p	neurofilament light polypeptide	NEFL
mun-miR-215-5p	bifunctional 3'-phosphoadenosine 5'-phosphosulfate synthase 2	PAPSS2
mun-miR-215-5p	cone cGMP-specific 3',5'-cyclic phosphodiesterase subunit alpha'	PDE6C
mun-miR-215-5p	sister chromatid cohesion protein PDS5 B	PDS5B
mun-miR-215-5p	plakophilin-4	PKP4
mun-miR-215-5p	peroxiredoxin-4	PRDX4
mun-miR-215-5p	proline-rich protein 5	PRR5
mun-miR-215-5p	rab GTPase-activating protein 1	RABGAP1
mun-miR-215-5p	RING finger and SPRY domain-containing protein 1	RSPRY1
mun-miR-215-5p	syntenin-1	SDCBP
mun-miR-215-5p	septin-7	SEPT7
mun-miR-215-5p	sortilin-related receptor	SORL1
mun-miR-215-5p	transcription initiation factor TFIID subunit 1	TAF1
mun-miR-215-5p	nucleolysin TIAR	TIAL1
mun-miR-215-5p	serine/threonine-protein kinase WNK1	WNK1
mun-miR-2954-3p	alpha/beta hydrolase domain-containing protein 17B	ABHD17B
mun-miR-2954-3p	BRISC complex subunit Abro1	ABRAXAS2
mun-miR-2954-3p	cytoplasmic aconitate hydratase	ACO1
mun-miR-2954-3p	acyl-coenzyme A thioesterase 13	ACOT13
mun-miR-2954-3p	latrophilin-2	ADGRL2
mun-miR-2954-3p	adiponectin receptor protein 2	ADIPOR2
mun-miR-2954-3p	[Protein ADP-ribosylarginine] hydrolase-like protein 1	ADPRHL1
mun-miR-2954-3p	acylglycerol kinase, mitochondrial	AGK
mun-miR-2954-3p	A-kinase anchor protein 13	AKAP13
mun-miR-2954-3p	AKT-interacting protein	AKTIP
mun-miR-2954-3p	THO complex subunit 4	ALYREF
mun-miR-2954-3p	AP-3 complex subunit sigma-1	AP3S1
mun-miR-2954-3p	ADP-ribosylation factor 6	ARF6
mun-miR-2954-3p	brefeldin A-inhibited guanine nucleotide-exchange protein 1	ARFGEF1
mun-miR-2954-3p	sodium/potassium-transporting ATPase subunit alpha-1	ATP1A1
mun-miR-2954-3p	autism susceptibility gene 2 protein	AUTS2
mun-miR-2954-3p	BRCA1-associated protein	BAP1
mun-miR-2954-3p	UPF0668 protein C10orf76	C10orf76
mun-miR-2954-3p	UPF0454 protein C12orf49	C12orf49
mun-miR-2954-3p	C7orf63	C7orf63
mun-miR-2954-3p	C9orf84	C9orf84
mun-miR-2954-3p	calcium/calmodulin-dependent protein kinase type IV	CAMK4
mun-miR-2954-3p	cullin-associated NEDD8-dissociated protein 1	CAND1
mun-miR-2954-3p	caspase recruitment domain-containing protein 11	CARD11
mun-miR-2954-3p	coiled-coil domain-containing protein 93	CCDC93
mun-miR-2954-3p	G1/S-specific cyclin-E1	CCNE1
mun-miR-2954-3p	cadherin-12	CDH12
mun-miR-2954-3p	charged multivesicular body protein 6	CHMP6
mun-miR-2954-3p	carbohydrate sulfotransferase 15	CHST15
mun-miR-2954-3p	chondroitin sulfate synthase 3	CHSY3
mun-miR-2954-3p	collagen alpha-1(XII) chain	COL12A1
mun-miR-2954-3p	copine-7	CPNE7
mun-miR-2954-3p	probable ATP-dependent RNA helicase DHX40	DHX40
mun-miR-2954-3p	dihydrolipoyllysine-residue succinyltransferase component of 2-oxoglutarate dehydrogenase complex, mitochondrial	DLST
mun-miR-2954-3p	EGF-like repeat and discoidin I-like domain-containing protein 3	EDIL3
mun-miR-2954-3p	ELAV-like protein 2	ELAVL2
mun-miR-2954-3p	ELMO domain-containing protein 1	ELMOD1
mun-miR-2954-3p	elongator complex protein 3	ELP3
mun-miR-2954-3p	enhancer of polycomb 1	EPC1
mun-miR-2954-3p	fibroblast growth factor 16	FGF16
mun-miR-2954-3p	FH1/FH2 domain-containing protein 1	FHOD1
mun-miR-2954-3p	leucine-rich repeat transmembrane protein FLRT3	FLRT3
mun-miR-2954-3p	forkhead box protein P1	FOXP1
mun-miR-2954-3p	glucocorticoid-induced transcript 1 protein	GLCCI1
mun-miR-2954-3p	GMP synthase [glutamine-hydrolyzing]	GMPS
mun-miR-2954-3p	Golgi reassembly-stacking protein 2	GORASP2
mun-miR-2954-3p	glutamate receptor ionotropic, NMDA 1	GRIN1
mun-miR-2954-3p	general transcription factor IIE subunit 1	GTF2E1
mun-miR-2954-3p	high mobility group protein B1	HMGB1
mun-miR-2954-3p	3-hydroxy-3-methylglutaryl-coenzyme A reductase	HMGCR
mun-miR-2954-3p	60 kDa heat shock protein, mitochondrial	HSPD1
mun-miR-2954-3p	immediate early response 3-interacting protein 1	IER3IP1
mun-miR-2954-3p	KN motif and ankyrin repeat domain-containing protein 1	KANK1
mun-miR-2954-3p	BTB/POZ domain-containing protein kctd15	KCTD15
mun-miR-2954-3p	lysine-specific demethylase 6A	KDM6A
mun-miR-2954-3p	kit ligand	KITLG
mun-miR-2954-3p	Krueppel-like factor 3	KLF3
mun-miR-2954-3p	protein LAP2	LAP2
mun-miR-2954-3p	protein lin-7 C	LIN7C
mun-miR-2954-3p	leucine-rich repeat and immunoglobulin-like domain-containing nogo receptor-interacting protein 2	LINGO2
mun-miR-2954-3p	LON peptidase N-terminal domain and RING finger protein 1	LONRF1
mun-miR-2954-3p	lysophosphatidylcholine acyltransferase 1	LPCAT1
mun-miR-2954-3p	E3 ubiquitin-protein ligase MARCH7	MARCH7
mun-miR-2954-3p	colorectal mutant cancer protein	MCC
mun-miR-2954-3p	mediator of RNA polymerase II transcription subunit 13	MED13
mun-miR-2954-3p	E3 ubiquitin-protein ligase makorin-1	MKRN1
mun-miR-2954-3p	microtubule-associated tumor suppressor candidate 2	MTUS2
mun-miR-2954-3p	probable E3 ubiquitin-protein ligase MYCBP2	MYCBP2
mun-miR-2954-3p	unconventional myosin-X	MYO10
mun-miR-2954-3p	myosin-9	MYO9
mun-miR-2954-3p	NAD kinase domain-containing protein 1, mitochondrial	NADK1
mun-miR-2954-3p	bifunctional protein NCOAT	NCOAT
mun-miR-2954-3p	neuronal growth regulator 1	NEGR1
mun-miR-2954-3p	neurogenic differentiation factor 6	NEUROD6
mun-miR-2954-3p	nuclear factor 1 B-type	NFIB
mun-miR-2954-3p	nucleolar protein 11	NOL11
mun-miR-2954-3p	bile acid receptor	NR1H4
mun-miR-2954-3p	polyadenylate-binding protein-interacting protein 1	PAIP1
mun-miR-2954-3p	E3 ubiquitin-protein ligase pellino 2	PELI2
mun-miR-2954-3p	phospholipase A-2-activating protein	PLAA
mun-miR-2954-3p	serine/threonine-protein kinase PLK2	PLK2
mun-miR-2954-3p	procollagen-lysine,2-oxoglutarate 5-dioxygenase 2	PLOD1
mun-miR-2954-3p	polyamine-modulated factor 1	PMF1
mun-miR-2954-3p	periphilin-1	PPHLN1
mun-miR-2954-3p	serine protease 23	PRSS23
mun-miR-2954-3p	receptor-type tyrosine-protein phosphatase delta	PTPRD
mun-miR-2954-3p	receptor-type tyrosine-protein phosphatase F	PTPRF
mun-miR-2954-3p	glutamyl-tRNA(Gln) amidotransferase subunit A, mitochondrial	QRSL1
mun-miR-2954-3p	rab GTPase-activating protein 1	RABGAP1
mun-miR-2954-3p	GTP-binding protein RAD	RAD
mun-miR-2954-3p	REST corepressor 1	RCOR1
mun-miR-2954-3p	rapamycin-insensitive companion of mTOR	RICTOR
mun-miR-2954-3p	RING finger protein 126	RNF126
mun-miR-2954-3p	nuclear receptor ROR-beta	RORB
mun-miR-2954-3p	ribosomal RNA-processing protein 7 A	RRP7A
mun-miR-2954-3p	sex comb on midleg-like protein 2	SCML2
mun-miR-2954-3p	serine incorporator 3	SERINC3
mun-miR-2954-3p	excitatory amino acid transporter 1	SLC1A3
mun-miR-2954-3p	mothers against decapentaplegic 3	SMAD3
mun-miR-2954-3p	suppressor of cytokine signaling 6	SOCS6
mun-miR-2954-3p	signal recognition particle 14 kDa protein	SRP14
mun-miR-2954-3p	serine/arginine-rich splicing factor 10	SRSF10
mun-miR-2954-3p	serine/arginine-rich splicing factor 11	SRSF11
mun-miR-2954-3p	SUN domain-containing ossification factor	SUCO
mun-miR-2954-3p	suppressor of G2 allele of SKP1	SUGT1
mun-miR-2954-3p	extracellular sulfatase Sulf-1	SULF1
mun-miR-2954-3p	sushi domain-containing protein 4	SUSD4
mun-miR-2954-3p	histone-lysine N-methyltransferase SUV39H2	SUV39H2
mun-miR-2954-3p	probable methyltransferase TARBP1	TARBP1
mun-miR-2954-3p	TBC1 domain family member 1	TBC1D1
mun-miR-2954-3p	THAP domain-containing protein 4	THAP4
mun-miR-2954-3p	transducin-like enhancer protein 1	TLE1
mun-miR-2954-3p	transducin-like enhancer protein 4	TLE4
mun-miR-2954-3p	serine/threonine-protein kinase tousled-like 2	TLK2
mun-miR-2954-3p	transmembrane 9 superfamily member 3	TM9SF3
mun-miR-2954-3p	traf2 and NCK-interacting protein kinase	TNIK
mun-miR-2954-3p	activated CDC42 kinase 1	TNK2
mun-miR-2954-3p	probable E3 ubiquitin-protein ligase TRIM8	TRIM8
mun-miR-2954-3p	tubby-related protein 3	TULP3
mun-miR-2954-3p	ubiquitin-conjugating enzyme E2 Z	UBE2Z
mun-miR-2954-3p	ubiquitin conjugation factor E4 B	UBE4B
mun-miR-2954-3p	ubiquitin domain-containing protein 1	UBTD1
mun-miR-2954-3p	E3 ubiquitin-protein ligase UHRF2	UHRF2
mun-miR-2954-3p	serine/threonine-protein kinase ULK1	ULK1
mun-miR-2954-3p	general vesicular transport factor p115	USO1
mun-miR-2954-3p	guanine nucleotide exchange factor VAV3	VAV3
mun-miR-2954-3p	zinc finger FYVE domain-containing protein 19	ZFYVE19
mun-miR-2954-3p	zinc finger SWIM domain-containing protein 5	ZSWIM5
mun-miR-2954-3p	zinc finger SWIM domain-containing protein 6	ZSWIM6
mun-miR-375-3p	protein chibby 1	CBY1
mun-miR-375-3p	pre-mRNA-processing factor 17	CDC40
mun-miR-375-3p	lactoylglutathione lyase	GLO1
mun-miR-375-3p	hepatocyte nuclear factor 4-alpha	HNF4A
mun-miR-375-3p	intermediate filament family orphan 1	IFFO1
mun-miR-375-3p	G protein-activated inward rectifier potassium channel 1	KCNJ3
mun-miR-375-3p	leucine-rich repeat and transmembrane domain-containing protein 2	LRIT2
mun-miR-375-3p	LYR motif-containing protein 2	LYRM2
mun-miR-375-3p	tyrosine-protein phosphatase non-receptor type 4	PTPN4
mun-miR-375-3p	RNA-binding protein 24	RBM24
mun-miR-375-3p	vesicle transport protein SEC20	SEC20
mun-miR-375-3p	E3 ubiquitin-protein ligase SH3RF1	SH3RF1
mun-miR-375-3p	ubiquitin-conjugating enzyme E2 H	UBE2H
mun-miR-375-3p	lateral signaling target protein 2	ZFYVE28
mun-novel10-3p	calcium-dependent secretion activator 1	CADPS
mun-novel10-3p	contactin-2	CNTN2
mun-novel10-3p	zinc finger protein DPF3	DPF3
mun-novel10-3p	ERI1 exoribonuclease 3	ERI3
mun-novel10-3p	exostosin-1	EXT1
mun-novel10-3p	heat shock protein beta-7	HSPB7
mun-novel10-3p	junctional adhesion molecule C	JAM3
mun-novel10-3p	lysophospholipid acyltransferase 5	LPCAT3
mun-novel10-3p	E3 ubiquitin-protein ligase MARCH5	MARCH5
mun-novel10-3p	nuclear receptor subfamily 4 group A member 3	NR4A3
mun-novel10-3p	5-methylcytosine rRNA methyltransferase NSUN4	NSUN4
mun-novel10-3p	polyamine-modulated factor 1	PMF1
mun-novel10-3p	ras-related protein Ral-A	RALA
mun-novel10-3p	rap guanine nucleotide exchange factor 2	RAPGEF2
mun-novel10-3p	RPE-retinal G protein-coupled receptor	RGR
mun-novel10-3p	rho-related GTP-binding protein RhoC	RHOC
mun-novel10-3p	uncharacterized methyltransferase WBSCR22	WBSCR22
mun-novel101-3p	CDK2-associated and cullin domain-containing protein 1	CACUL1
mun-novel101-3p	lactoylglutathione lyase	GLO1
mun-novel101-3p	hedgehog-interacting protein	HHIP
mun-novel101-3p	junctophilin-1	JPH1
mun-novel101-3p	potassium voltage-gated channel subfamily S member 2	KCNS2
mun-novel101-3p	proteasome activator complex subunit 3	PSME3
mun-novel102-3p	BRISC complex subunit Abro1	ABRAXAS2
mun-novel102-3p	acyl-CoA-binding domain-containing protein 5	ACBD5
mun-novel102-3p	A disintegrin and metalloproteinase with thrombospondin motifs 1	ADAMTS1
mun-novel102-3p	hydroxyacid-oxoacid transhydrogenase, mitochondrial	ADHFE1
mun-novel102-3p	anterior gradient protein 2	AGR2
mun-novel102-3p	retinal dehydrogenase 2	ALDH1A2
mun-novel102-3p	anoctamin-10	ANO10
mun-novel102-3p	annexin A5	ANXA5
mun-novel102-3p	AP-1 complex subunit gamma-1	AP1G1
mun-novel102-3p	AP-3 complex subunit mu-1	AP3M1
mun-novel102-3p	rho GTPase-activating protein 42	ARHGAP42
mun-novel102-3p	actin-related protein 3B	ARP3B
mun-novel102-3p	argininosuccinate synthase	ASS1
mun-novel102-3p	UDP-GlcNAc:betaGal beta-1,3-N-acetylglucosaminyltransferase 7	B3GNT7
mun-novel102-3p	protein BANP	BANP
mun-novel102-3p	2-oxoisovalerate dehydrogenase subunit beta, mitochondrial	BCKDHB
mun-novel102-3p	bone morphogenetic protein 2	BMP2
mun-novel102-3p	lys-63-specific deubiquitinase BRCC36	BRCC3
mun-novel102-3p	serine/threonine-protein kinase BRSK2	BRSK2
mun-novel102-3p	C12orf73	C12orf73
mun-novel102-3p	calmodulin	CaM
mun-novel102-3p	calmodulin-regulated spectrin-associated protein 2	CAMSAP2
mun-novel102-3p	caveolin-1	CAV1
mun-novel102-3p	cyclin-C	CCNC
mun-novel102-3p	sialomucin core protein 24	CD164
mun-novel102-3p	cadherin-related family member 1	CDHR1
mun-novel102-3p	protein CDV3	CDV3
mun-novel102-3p	CCAAT/enhancer-binding protein zeta	CEBPZ
mun-novel102-3p	mitochondrial intermembrane space import and assembly protein 40	CHCHD4
mun-novel102-3p	chordin-like protein 1	CHRDL1
mun-novel102-3p	carbohydrate sulfotransferase 10	CHST10
mun-novel102-3p	carbohydrate sulfotransferase 15	CHST15
mun-novel102-3p	calmin	CLMN
mun-novel102-3p	calsyntenin-1	CLSTN1
mun-novel102-3p	nuclear envelope phosphatase-regulatory subunit 1	CNEP1R1
mun-novel102-3p	CCR4-NOT transcription complex subunit 7	CNOT7
mun-novel102-3p	collagen alpha-1(X) chain	COL10A1
mun-novel102-3p	COP9 signalosome complex subunit 7b	COPS7B
mun-novel102-3p	cAMP-responsive element-binding protein-like 2	CREBL2
mun-novel102-3p	corticotropin-releasing factor receptor 2	CRHR2
mun-novel102-3p	adapter molecule crk	CRK
mun-novel102-3p	cold shock domain-containing protein E1	CSDE1
mun-novel102-3p	cleavage stimulation factor subunit 1	CSTF1
mun-novel102-3p	dachshund 2	DACH2
mun-novel102-3p	DENN domain-containing protein 5A	DENND2A
mun-novel102-3p	C-myc promoter-binding protein	DENND4A
mun-novel102-3p	probable ATP-dependent RNA helicase DHX35	DHX35
mun-novel102-3p	disco-interacting protein 2 C	DIP2C
mun-novel102-3p	dedicator of cytokinesis protein 4	DOCK4
mun-novel102-3p	probable C-mannosyltransferase DPY19L1	DPY19L1
mun-novel102-3p	cytoplasmic dynein 1 light intermediate chain 1	DYNC1LI1
mun-novel102-3p	ectodysplasin-A receptor-associated adapter protein	EDARADD
mun-novel102-3p	endothelial differentiation-related factor 1	EDF1
mun-novel102-3p	transcription elongation factor B polypeptide 1	ELOC
mun-novel102-3p	ER membrane protein complex subunit 8	EMC1
mun-novel102-3p	ephrin type-A receptor 5	EPHA5
mun-novel102-3p	eukaryotic peptide chain release factor subunit 1	ETF1
mun-novel102-3p	exocyst complex component 1	EXOC1
mun-novel102-3p	exosome complex component RRP45	EXOSC9
mun-novel102-3p	protein FAM107B	FAM107B
mun-novel102-3p	protein FAM171A1	FAM171A1
mun-novel102-3p	protein FAM20A	FAM20A
mun-novel102-3p	protein FAM53A	FAM53A
mun-novel102-3p	F-box only protein 7	FBXO7
mun-novel102-3p	fragile X mental retardation protein 1 B	FMR1
mun-novel102-3p	forkhead box protein G1	FOXG1
mun-novel102-3p	forkhead box protein P1	FOXP1
mun-novel102-3p	forkhead box protein P2	FOXP2
mun-novel102-3p	follistatin-related protein 4	FSTL4
mun-novel102-3p	tyrosine-protein kinase Fyn	FYN
mun-novel102-3p	polypeptide N-acetylgalactosaminyltransferase 11	GALNT11
mun-novel102-3p	polypeptide N-acetylgalactosaminyltransferase-like 6	GALNTL6
mun-novel102-3p	glutamyl-tRNA(Gln) amidotransferase subunit B, mitochondrial	GATB
mun-novel102-3p	GTP-binding protein GEM	GEM
mun-novel102-3p	gap junction beta-1 protein	GJB1
mun-novel102-3p	glucocorticoid-induced transcript 1 protein	GLCCI1
mun-novel102-3p	lactoylglutathione lyase	GLO1
mun-novel102-3p	glyoxalase domain-containing protein 4	GLOD4
mun-novel102-3p	gremlin-1	GREM1
mun-novel102-3p	putative GTP-binding protein 6	GTPBP6
mun-novel102-3p	E3 ubiquitin-protein ligase HACE1	HACE1
mun-novel102-3p	zinc finger protein 40	HIVEP1
mun-novel102-3p	heterogeneous nuclear ribonucleoprotein H	HNRNPH1
mun-novel102-3p	heterochromatin protein 1-binding protein 3	HP1BP3
mun-novel102-3p	inhibitor of growth protein 4	ING4
mun-novel102-3p	tyrosine-protein kinase JAK2	JAK2
mun-novel102-3p	transcription factor AP-1	JUN
mun-novel102-3p	histone acetyltransferase KAT7	KAT7
mun-novel102-3p	lysine-specific demethylase 4B	KDM4B
mun-novel102-3p	lysine-specific demethylase 6A	KDM6A
mun-novel102-3p	KH domain-containing, RNA-binding, signal transduction-associated protein 1	KHDRBS1
mun-novel102-3p	KIAA0247	KIAA0247
mun-novel102-3p	kinesin-like protein KIF1B	KIF1B
mun-novel102-3p	kinesin-like protein KIF26A	KIF26A
mun-novel102-3p	kinesin heavy chain isoform 5C	KIF5C
mun-novel102-3p	importin subunit alpha-4	KPNA3
mun-novel102-3p	glycosyltransferase-like protein LARGE1	LARGE1
mun-novel102-3p	ligand-dependent corepressor	LCOR
mun-novel102-3p	leucine-rich repeat transmembrane neuronal protein 1	LRRTM1
mun-novel102-3p	LYR motif-containing protein 4	LYRM4
mun-novel102-3p	lysM and putative peptidoglycan-binding domain-containing protein 2	LYSMD2
mun-novel102-3p	membrane-associated guanylate kinase, WW and PDZ domain-containing protein 3	MAGI3
mun-novel102-3p	mitogen-activated protein kinase kinase kinase kinase 4	MAP4K4
mun-novel102-3p	mitogen-activated protein kinase 14	MAPK14
mun-novel102-3p	serine/threonine-protein kinase MARK1	MARK1
mun-novel102-3p	myelin basic protein	MBP
mun-novel102-3p	methylcrotonoyl-CoA carboxylase beta chain, mitochondrial	MCCC2
mun-novel102-3p	MAM domain-containing glycosylphosphatidylinositol anchor protein 2	MDGA2
mun-novel102-3p	mediator of RNA polymerase II transcription subunit 31	MED31
mun-novel102-3p	mitofusin-2	MFN2
mun-novel102-3p	MLX-interacting protein	MLXIP
mun-novel102-3p	matrix metalloproteinase-16	MMP16
mun-novel102-3p	nicotinamide phosphoribosyltransferase	NAMPT
mun-novel102-3p	neuron navigator 3	NAV3
mun-novel102-3p	protein NDRG1	NDRG1
mun-novel102-3p	complex I intermediate-associated protein 30, mitochondrial	NDUFAF1
mun-novel102-3p	protein NEL-like	NELL1
mun-novel102-3p	nexilin	NEXN
mun-novel102-3p	nuclear factor 1 A-type	NFIA
mun-novel102-3p	epididymal secretory protein E1	NPC2
mun-novel102-3p	nuclear receptor subfamily 2 group E member 1	NR2E1
mun-novel102-3p	nuclear receptor-binding factor 2	NRBF2
mun-novel102-3p	ornithine aminotransferase, mitochondrial	OAT
mun-novel102-3p	2-oxoglutarate and iron-dependent oxygenase domain-containing protein 1	OGFOD1
mun-novel102-3p	protein kinase C and casein kinase substrate in neurons protein 2	PACSIN2
mun-novel102-3p	high affinity cAMP-specific 3',5'-cyclic phosphodiesterase 7A	PDE7A
mun-novel102-3p	protein disulfide-isomerase A4	PDIA4
mun-novel102-3p	PERQ amino acid-rich with GYF domain-containing protein 2	PERQ2
mun-novel102-3p	CDP-diacylglycerol--glycerol-3-phosphate 3-phosphatidyltransferase, mitochondrial	PGS1
mun-novel102-3p	PHD finger protein 12	PHF12
mun-novel102-3p	phosphatidylinositol 3-kinase regulatory subunit gamma	PIK3R3
mun-novel102-3p	phosphatidylinositol 4-phosphate 5-kinase type-1 beta	PIP5K1B
mun-novel102-3p	cAMP-dependent protein kinase inhibitor alpha	PKIA
mun-novel102-3p	1-phosphatidylinositol 4,5-bisphosphate phosphodiesterase eta-2	PLCH2
mun-novel102-3p	pleckstriny domain-containing family A member 5	PLEKHA5
mun-novel102-3p	mitochondrial-processing peptidase subunit beta	PMPCB
mun-novel102-3p	peroxisome proliferator-activated receptor gamma coactivator 1-alpha	PPARGC1A
mun-novel102-3p	protein phosphatase 1 regulatory inhibitor subunit 16B	PPP1R16B
mun-novel102-3p	neurabin-1	PPP1R9A
mun-novel102-3p	serine/threonine-protein phosphatase 2A 55 kDa regulatory subunit B alpha isoform	PPP2R2A
mun-novel102-3p	serine/threonine-protein phosphatase 4 regulatory subunit 2	PPP4R2
mun-novel102-3p	prospero homeobox protein 1	PROX1
mun-novel102-3p	pre-mRNA-processing-splicing factor 8	PRPF8
mun-novel102-3p	ribose-phosphate pyrophosphokinase 2	PRPS2
mun-novel102-3p	receptor-type tyrosine-protein phosphatase S	PTPRS
mun-novel102-3p	glutamine-rich protein 1	QRICH1
mun-novel102-3p	guanine nucleotide exchange factor for Rab-3A	RAB3IL1
mun-novel102-3p	ras-related protein Rab-5A	RAB5A
mun-novel102-3p	ras-related protein Rap-2c	RAP2C
mun-novel102-3p	reticulocalbin-2	RCN2
mun-novel102-3p	reelin	RELN
mun-novel102-3p	protein RER1	RER1
mun-novel102-3p	GTP-binding protein Rheb	RHEB
mun-novel102-3p	regulating synaptic membrane exocytosis protein 4	RIMS4
mun-novel102-3p	E3 ubiquitin-protein ligase RING2	RING2
mun-novel102-3p	E3 ubiquitin-protein ligase Arkadia	RNF111
mun-novel102-3p	replication protein A 70 kDa DNA-binding subunit	RPA1
mun-novel102-3p	replication protein A 32 kDa subunit	RPA2
mun-novel102-3p	DNA-directed RNA polymerase III subunit RPC8	RPC25
mun-novel102-3p	dolichyl-diphosphooligosaccharide--protein glycosyltransferase subunit 2	RPN2
mun-novel102-3p	tyrosine-protein kinase RYK	RYK
mun-novel102-3p	DNA-binding protein SATB1	SATB1
mun-novel102-3p	syndecan-4	SDC4
mun-novel102-3p	protein transport protein Sec31A	SEC31A
mun-novel102-3p	septin-11	SEPT11
mun-novel102-3p	serine incorporator 3	SERINC3
mun-novel102-3p	N-lysine methyltransferase SETD6	SETD6
mun-novel102-3p	SH3 domain-containing RING finger protein 3	SH3RF3
mun-novel102-3p	SHC-transforming protein 4	SHC4
mun-novel102-3p	MFS-type transporter SLC18B1	SLC18B1
mun-novel102-3p	sodium/potassium/calcium exchanger 4	SLC24A4
mun-novel102-3p	solute carrier family 25 member 51	SLC25A5
mun-novel102-3p	N-lysine methyltransferase SMYD2	SMYD2
mun-novel102-3p	sorbin and SH3 domain-containing protein 2	SORBS2
mun-novel102-3p	signal peptidase complex subunit 3	SPC22
mun-novel102-3p	paraplegin	SPG7
mun-novel102-3p	transcription factor PU.1	SPI1
mun-novel102-3p	sprouty-related, EVH1 domain-containing protein 1	SPRED1
mun-novel102-3p	signal recognition particle subunit SRP72	SRP72
mun-novel102-3p	single-stranded DNA-binding protein 3	SSBP3
mun-novel102-3p	beta-galactoside alpha-2,6-sialyltransferase 2	ST6GAL1
mun-novel102-3p	syntaxin-2	STX2
mun-novel102-3p	SUN domain-containing ossification factor	SUCO
mun-novel102-3p	TATA-box-binding protein	TBP
mun-novel102-3p	mitochondrial import inner membrane translocase subunit Tim22	TIMM22
mun-novel102-3p	transmembrane 6 superfamily member 1	TM6SF1
mun-novel102-3p	protein lifeguard 3	TMBIM1
mun-novel102-3p	transmembrane and coiled-coil domains protein 2	TMCC2
mun-novel102-3p	transmembrane protein 165	TMEM165
mun-novel102-3p	transmembrane protein 47	TMEM47
mun-novel102-3p	transmembrane protein 50B	TMEM50B
mun-novel102-3p	transmembrane protein 65	TMEM65
mun-novel102-3p	transportin-1	TNPO1
mun-novel102-3p	triple functional domain protein	TRIO
mun-novel102-3p	tetraspanin-7	TSPAN7
mun-novel102-3p	gamma-tubulin complex component 6	TUBGCP6
mun-novel102-3p	thymidylate synthase	TYMS
mun-novel102-3p	ubiquitin-associated domain-containing protein 2	UBAC2
mun-novel102-3p	ubiquitin-conjugating enzyme E2 G1	UBE2G1
mun-novel102-3p	ubiquitin-conjugating enzyme E2 H	UBE2H
mun-novel102-3p	SUMO-conjugating enzyme UBC9	UBE2I
mun-novel102-3p	UBX domain-containing protein 7	UBXN7
mun-novel102-3p	ubiquitin fusion degradation protein 1	UFD1
mun-novel102-3p	UDP-glucose:glycoprotein glucosyltransferase 1	UGGT1
mun-novel102-3p	general vesicular transport factor p115	USO1
mun-novel102-3p	ubiquitin carboxyl-terminal hydrolase 25	USP25
mun-novel102-3p	ubiquitin carboxyl-terminal hydrolase 31	USP31
mun-novel102-3p	ubiquitin carboxyl-terminal hydrolase 7	USP7
mun-novel102-3p	voltage-dependent anion-selective channel protein 1	VDAC1
mun-novel102-3p	vacuolar protein sorting-associated protein 54	VPS54
mun-novel102-3p	serine/threonine-protein kinase WNK2	WNK2
mun-novel102-3p	X-box-binding protein 1	XBP1
mun-novel102-3p	XK-related protein 6	XKR6
mun-novel102-3p	protein yippee-like 2	YPEL2
mun-novel102-3p	zinc finger and BTB domain-containing protein 26	ZBTB26
mun-novel102-3p	zinc finger CCCH domain-containing protein 7A	ZC3H7A
mun-novel102-3p	zinc finger protein 827	ZNF827
mun-novel102-3p	zinc finger ZZ-type and EF-hand domain-containing protein 1	ZZEF1
mun-novel15-3p	calcium-dependent secretion activator 1	CADPS
mun-novel15-3p	contactin-2	CNTN2
mun-novel15-3p	zinc finger protein DPF3	DPF3
mun-novel15-3p	ERI1 exoribonuclease 3	ERI3
mun-novel15-3p	exostosin-1	EXT1
mun-novel15-3p	heat shock protein beta-7	HSPB7
mun-novel15-3p	junctional adhesion molecule C	JAM3
mun-novel15-3p	lysophospholipid acyltransferase 5	LPCAT3
mun-novel15-3p	E3 ubiquitin-protein ligase MARCH5	MARCH5
mun-novel15-3p	nuclear receptor subfamily 4 group A member 3	NR4A3
mun-novel15-3p	5-methylcytosine rRNA methyltransferase NSUN4	NSUN4
mun-novel15-3p	ras-related protein Ral-A	RALA
mun-novel15-3p	rap guanine nucleotide exchange factor 2	RAPGEF2
mun-novel15-3p	RPE-retinal G protein-coupled receptor	RGR
mun-novel15-3p	rho-related GTP-binding protein RhoC	RHOC
mun-novel15-3p	uncharacterized methyltransferase WBSCR22	WBSCR22
mun-novel24-5p	amyloid beta A4 protein	APP
mun-novel24-5p	CCR4-NOT transcription complex subunit 6	CNOT6
mun-novel24-5p	protein DGCR14	DGCR14
mun-novel24-5p	band 4.1-like protein 2	EPB41L2
mun-novel24-5p	gamma-aminobutyric acid receptor subunit alpha-2	GABRA2
mun-novel24-5p	juxtaposed with another zinc finger protein 1	JAZF1
mun-novel24-5p	nicalin	NCLN
mun-novel24-5p	nuclear factor NF-kappa-B p105 subunit	NFKB1
mun-novel24-5p	homeobox protein Nkx-6.2	NKX6-2
mun-novel24-5p	nuclear pore complex protein Nup155	NUP155
mun-novel24-5p	PAB-dependent poly(A)-specific ribonuclease subunit 3	PAN3
mun-novel24-5p	peptidyl-prolyl cis-trans isomerase F, mitochondrial	PPIF
mun-novel24-5p	E3 ubiquitin-protein ligase RNF185	RNF185
mun-novel24-5p	spermidine synthase	SRM
mun-novel24-5p	gamma-tubulin complex component 3	TUBGCP3
mun-novel29-3p	activity-dependent neuroprotector homeobox protein	ADNP
mun-novel29-3p	ankyrin repeat domain-containing protein 10	ANKRD10
mun-novel29-3p	actin-related protein 2	ARP2
mun-novel29-3p	ATPase family AAA domain-containing protein 1	ATAD1
mun-novel29-3p	autophagy-related protein 16-1	ATG16L1
mun-novel29-3p	atlastin-2	ATL2
mun-novel29-3p	calcium-transporting ATPase type 2C member 1	ATP2C1
mun-novel29-3p	V-type proton ATPase subunit E 1	ATP6V1E1
mun-novel29-3p	late secretory pathway protein AVL9	AVL9
mun-novel29-3p	B9 domain-containing protein 1	B9D1
mun-novel29-3p	nucleosome-remodeling factor subunit BPTF	BPTF
mun-novel29-3p	CDK5 and ABL1 enzyme substrate 2	CABLES2
mun-novel29-3p	calmodulin	CaM
mun-novel29-3p	F-actin-capping protein subunit alpha-1	CAPZA1
mun-novel29-3p	cancer susceptibility candidate protein 1	CASC1
mun-novel29-3p	E3 ubiquitin-protein ligase Hakai	CBLL1
mun-novel29-3p	cyclin-C	CCNC
mun-novel29-3p	G1/S-specific cyclin-D2	CCND2
mun-novel29-3p	serine/threonine-protein kinase MRCK beta	CDC42BPB
mun-novel29-3p	cadherin-11	CDH11
mun-novel29-3p	cadherin-related family member 1	CDHR1
mun-novel29-3p	cyclin-dependent kinase 17	CDK17
mun-novel29-3p	centrosomal protein of 170 kDa	CEP170
mun-novel29-3p	cofilin-2	CFL2
mun-novel29-3p	coiled-coil-helix-coiled-coil-helix domain-containing protein 2, mitochondrial	CHCHD2
mun-novel29-3p	chromodomain-helicase-DNA-binding protein 9	CHD9
mun-novel29-3p	choline kinase alpha	CHKA
mun-novel29-3p	chromatin target of PRMT1 protein	CHTOP
mun-novel29-3p	cytoskeleton-associated protein 5	CKAP5
mun-novel29-3p	methylosome subunit pICln	CLNS1A
mun-novel29-3p	clathrin heavy chain 1	CLTC
mun-novel29-3p	clustered mitochondria protein	CLUH
mun-novel29-3p	UMP-CMP kinase	CMPK1
mun-novel29-3p	metal transporter CNNM2	CNNM2
mun-novel29-3p	collagen alpha-2(I) chain	COL2A1
mun-novel29-3p	carnitine O-palmitoyltransferase 1, liver isoform	CPT1A
mun-novel29-3p	death domain-containing protein CRADD	CRADD
mun-novel29-3p	casein kinase II subunit alpha'	CSNK2A2
mun-novel29-3p	connective tissue growth factor	CTGF
mun-novel29-3p	catenin delta-2	CTNND2
mun-novel29-3p	c-X-C motif chemokine 14	CXCL14
mun-novel29-3p	dachshund 1	DACH1
mun-novel29-3p	ATP-dependent RNA helicase DDX18	DDX18
mun-novel29-3p	ATP-dependent RNA helicase DDX3X	DDX3X
mun-novel29-3p	probable ATP-dependent RNA helicase DDX46	DDX46
mun-novel29-3p	DEP domain-containing protein 5	DEPDC5
mun-novel29-3p	disco-interacting protein 2 C	DIP2C
mun-novel29-3p	dual serine/threonine and tyrosine protein kinase	DSTYK
mun-novel29-3p	dual specificity protein phosphatase 10	DUSP10
mun-novel29-3p	elongation factor 1-alpha 1	EEF1A1
mun-novel29-3p	116 kDa U5 small nuclear ribonucleoprotein component	EFTUD2
mun-novel29-3p	delta and Notch-like epidermal growth factor-related receptor	EGF
mun-novel29-3p	endoplasmic reticulum-Golgi intermediate compartment protein 1	ERGIC1
mun-novel29-3p	exocyst complex component 1	EXOC1
mun-novel29-3p	F-box only protein 25	FBXO25
mun-novel29-3p	ras GTPase-activating protein-binding protein 1	G3BP1
mun-novel29-3p	GTP-binding protein GEM	GEM
mun-novel29-3p	glucose-induced degradation protein 8	GID8
mun-novel29-3p	golgin subfamily A member 7	GOLGA7
mun-novel29-3p	glucose-6-phosphate isomerase	GPI
mun-novel29-3p	probable G-protein coupled receptor 112	GPR112
mun-novel29-3p	probable G-protein coupled receptor 125	GPR125
mun-novel29-3p	probable G-protein coupled receptor 85	GPR85
mun-novel29-3p	glutamate receptor ionotropic, kainate 2	GRIK2
mun-novel29-3p	general transcription factor 3C polypeptide 3	GTF3C3
mun-novel29-3p	trifunctional enzyme subunit beta, mitochondrial	HADHB
mun-novel29-3p	histone deacetylase 9	HDAC9
mun-novel29-3p	integrator complex subunit 10	INTS10
mun-novel29-3p	ras GTPase-activating-like protein IQGAP2	IQGAP2
mun-novel29-3p	iron-responsive element-binding protein 2	IREB2
mun-novel29-3p	interferon regulatory factor 2	IRF2
mun-novel29-3p	lysosomal-associated transmembrane protein 4A	LAPTM4A
mun-novel29-3p	la-related protein 4B	LARP4B
mun-novel29-3p	low-density lipoprotein receptor-related protein 8	LRP8
mun-novel29-3p	U6 snRNA-associated Sm-like protein LSm7	LSM7
mun-novel29-3p	complex III assembly factor LYRM7	LYRM7
mun-novel29-3p	mitogen-activated protein kinase kinase kinase 2	MAP3K2
mun-novel29-3p	mitogen-activated protein kinase 1	MAPK1
mun-novel29-3p	mitogen-activated protein kinase 8	MAPK8
mun-novel29-3p	microtubule-associated protein RP/EB family member 1	MAPRE1
mun-novel29-3p	E3 ubiquitin-protein ligase MARCH5	MARCH5
mun-novel29-3p	monocarboxylate transporter 4	MCT4
mun-novel29-3p	mediator of RNA polymerase II transcription subunit 12	MED12
mun-novel29-3p	mirror-image polydactyly gene 1 protein	MIPOL1
mun-novel29-3p	E3 ubiquitin-protein ligase makorin-1	MKRN1
mun-novel29-3p	MLX-interacting protein	MLXIP
mun-novel29-3p	MAGUK p55 subfamily member 6	MPP6
mun-novel29-3p	39S ribosomal protein L32, mitochondrial	MRPL32
mun-novel29-3p	metal regulatory transcription factor 1	MTF1
mun-novel29-3p	neurocalcin-delta	NCALD
mun-novel29-3p	cytoplasmic protein NCK2	NCK2
mun-novel29-3p	NADH dehydrogenase [ubiquinone] 1 beta subcomplex subunit 5, mitochondrial	NDUFB5
mun-novel29-3p	serine/threonine-protein kinase Nek9	NEK9
mun-novel29-3p	neuroligin-1	NLGN1
mun-novel29-3p	glycylpeptide N-tetradecanoyltransferase 2	NMT2
mun-novel29-3p	nucleolar protein 16	NOL16
mun-novel29-3p	nuclear receptor subfamily 4 group A member 3	NR4A3
mun-novel29-3p	vesicle-fusing ATPase	NSF
mun-novel29-3p	kinetochore protein Nuf2	NUF2
mun-novel29-3p	protein odd-skipped-related 1	OSR1
mun-novel29-3p	partitioning defective 3	PARD3
mun-novel29-3p	pre-B-cell leukemia transcription factor 3	PBX3
mun-novel29-3p	PCI domain-containing protein 2	PCID2
mun-novel29-3p	high affinity cAMP-specific and IBMX-insensitive 3',5'-cyclic phosphodiesterase 8B	PDE8B
mun-novel29-3p	peroxisomal membrane protein PEX16	PEX16
mun-novel29-3p	serine/threonine-protein kinase PLK2	PLK2
mun-novel29-3p	polyamine-modulated factor 1	PMF1
mun-novel29-3p	arginine/serine-rich protein PNISR	PNISR
mun-novel29-3p	26S protease regulatory subunit 6A	PSMC3
mun-novel29-3p	26S proteasome non-ATPase regulatory subunit 10	PSMD10
mun-novel29-3p	polypyrimidine tract-binding protein 2	PTBP2
mun-novel29-3p	ras-related protein Rab-1A	RAB1A
mun-novel29-3p	ras-related protein Rab-8B	RAB8B
mun-novel29-3p	RAF proto-oncogene serine/threonine-protein kinase	RAF1
mun-novel29-3p	retinol dehydrogenase 10	RDH10
mun-novel29-3p	replication factor C subunit 1	RFC1
mun-novel29-3p	DNA-binding protein RFX7	RFX7
mun-novel29-3p	DNA-binding protein RFXANK	RFXANK
mun-novel29-3p	regulatory factor X-associated protein	RFXAP
mun-novel29-3p	mRNA cap guanine-N7 methyltransferase	RNMT
mun-novel29-3p	60S ribosomal protein L3	RPL3
mun-novel29-3p	RNA polymerase-associated protein RTF1	RTF1
mun-novel29-3p	protein SCAI	SCAI
mun-novel29-3p	short coiled-coil protein	SCOC
mun-novel29-3p	signal peptide, CUB and EGF-like domain-containing protein 1	SCUBE1
mun-novel29-3p	serine incorporator 3	SERINC3
mun-novel29-3p	glia-derived nexin	SERPINE2
mun-novel29-3p	sestrin-1	SESN1
mun-novel29-3p	long-chain fatty acid transport protein 4	SLC27A4
mun-novel29-3p	clathrin coat assembly protein AP180	SNAP91
mun-novel29-3p	alpha-synuclein	SNCA
mun-novel29-3p	sorting nexin-7	SNX7
mun-novel29-3p	spermatogenesis-associated protein 2	SPATA2
mun-novel29-3p	spermidine synthase	SRM
mun-novel29-3p	protein SSXT	SSXT
mun-novel29-3p	sin3 histone deacetylase corepressor complex component SDS3	SUDS3
mun-novel29-3p	surfeit locus protein 1	SURF1
mun-novel29-3p	histone-lysine N-methyltransferase SUV420H1	SUV420H1
mun-novel29-3p	heterogeneous nuclear ribonucleoprotein Q	SYNCRIP
mun-novel29-3p	protachykinin-1	TAC1
mun-novel29-3p	transcription initiation factor TFIID subunit 5	TAF5
mun-novel29-3p	DNA-3-methyladenine glycosylase	TAG
mun-novel29-3p	F-box-like/WD repeat-containing protein TBL1XR1	TBL1XR1
mun-novel29-3p	metalloproteinase inhibitor 3	TIMP3
mun-novel29-3p	transmembrane and coiled-coil domains protein 1	TMCC1
mun-novel29-3p	mitochondrial inner membrane protein	TMEM65
mun-novel29-3p	thymosin beta-15A	TMSB15A
mun-novel29-3p	tetratricopeptide repeat protein 1	TTC1
mun-novel29-3p	thioredoxin domain-containing protein 17	TXNDC17
mun-novel29-3p	ubiquitin-conjugating enzyme E2 L3	UBE2L3
mun-novel29-3p	ubiquitin-like protein 7	UBL7
mun-novel29-3p	netrin receptor UNC5C	UNC5C
mun-novel29-3p	uracil phosphoribosyltransferase	UPP
mun-novel29-3p	inactive ubiquitin carboxyl-terminal hydrolase 54	USP54
mun-novel29-3p	transcription cofactor vestigial-like protein 4	VGLL4
mun-novel29-3p	very low-density lipoprotein receptor	VLDLR
mun-novel29-3p	uncharacterized methyltransferase WBSCR22	WBSCR22
mun-novel29-3p	WD repeat-containing protein 20	WDR20
mun-novel29-3p	tRNA (guanine-N(7)-)-methyltransferase subunit WDR4	WDR4
mun-novel29-3p	WD repeat-containing protein 82	WDR82
mun-novel29-3p	exportin-1	XPO1
mun-novel29-3p	YLP motif-containing protein 1	YLPM1
mun-novel29-3p	zinc finger and BTB domain-containing protein 10	ZBTB10
mun-novel29-3p	probable palmitoyltransferase ZDHHC14	ZDHHC14
mun-novel29-3p	AN1-type zinc finger protein 6	ZFAND6
mun-novel29-3p	zinc finger MYND domain-containing protein 11	ZMYND11
mun-novel29-3p	zinc finger protein 521	ZNF521
mun-novel29-3p	E3 ubiquitin-protein ligase ZNRF2	ZNRF2
mun-novel31-3p	abhydrolase domain-containing protein 2	ABHD2
mun-novel31-3p	alpha-1,2-mannosyltransferase ALG9	ALG9
mun-novel31-3p	APC membrane recruitment protein 2	AMER2
mun-novel31-3p	ankyrin repeat domain-containing protein 37	ANKRD37
mun-novel31-3p	AP-3 complex subunit beta-1	AP3B1
mun-novel31-3p	armadillo repeat protein deleted in velo-cardio-facial syndrome	ARVCF
mun-novel31-3p	asparagine synthetase [glutamine-hydrolyzing]	ASNS
mun-novel31-3p	V-type proton ATPase subunit H	ATP6V1H
mun-novel31-3p	C3orf26	C3orf26
mun-novel31-3p	C7orf73	C7orf73
mun-novel31-3p	peripheral plasma membrane protein CASK	CASK
mun-novel31-3p	protein CBFA2T1	CBFA2T1
mun-novel31-3p	coiled-coil domain-containing protein 43	CCDC43
mun-novel31-3p	coiled-coil domain-containing protein 80	CCDC80
mun-novel31-3p	cold-inducible RNA-binding protein	CIRBP
mun-novel31-3p	collagen alpha-1(III) chain	COL3A1
mun-novel31-3p	adapter molecule crk	CRK
mun-novel31-3p	CTD small phosphatase-like protein 2	CTDSPL2
mun-novel31-3p	stromal cell-derived factor 1	CXCL12
mun-novel31-3p	DEP domain-containing protein 5	DEPDC5
mun-novel31-3p	disks large 1	DLG1
mun-novel31-3p	disks large 2	DLG1
mun-novel31-3p	dnaJ subfamily C member 7	DNAJC7
mun-novel31-3p	inactive dipeptidyl peptidase 10	DPP10
mun-novel31-3p	ELL-associated factor 1	EAF1
mun-novel31-3p	eukaryotic translation elongation factor 1 epsilon-1	EEF1E1
mun-novel31-3p	EF-hand calcium-binding domain-containing protein 14	EFCAB14
mun-novel31-3p	elongation of very long chain fatty acids protein 1	ELOVL1
mun-novel31-3p	protocadherin Fat 2	FAT2
mun-novel31-3p	peptidyl-prolyl cis-trans isomerase FKBP1B	FKBP1B
mun-novel31-3p	neuronal membrane glycoprotein M6-a	GPM6A
mun-novel31-3p	probable G-protein coupled receptor 158	GPR158
mun-novel31-3p	E3 ubiquitin-protein ligase HECTD1	HECTD1
mun-novel31-3p	hematological and neurological expressed 1 protein	HN1
mun-novel31-3p	SOSS complex subunit C	INIP
mun-novel31-3p	keratinocyte-associated transmembrane protein 2	KCT2
mun-novel31-3p	KH domain-containing, RNA-binding, signal transduction-associated protein 1	KHDRBS1
mun-novel31-3p	UPF0606 protein KIAA1549	KIAA1549
mun-novel31-3p	low-density lipoprotein receptor-related protein 12	LRP12
mun-novel31-3p	mitogen-activated protein kinase kinase kinase 5	MAP3K5
mun-novel31-3p	muscleblind-like protein 1	MBNL1
mun-novel31-3p	homeobox protein Meis2	MEIS2
mun-novel31-3p	histone-lysine N-methyltransferase MLL	MLL
mun-novel31-3p	collagenase 3	MMP13
mun-novel31-3p	MOB kinase activator 1A	MOB1A
mun-novel31-3p	methionine-R-sulfoxide reductase B3, mitochondrial	MSRB3
mun-novel31-3p	nuclear transcription factor Y subunit gamma	NFYC
mun-novel31-3p	non-POU domain-containing octamer-binding protein	NONO
mun-novel31-3p	epididymal secretory protein E1	NPC2
mun-novel31-3p	nuclear receptor subfamily 4 group A member 3	NR4A3
mun-novel31-3p	nuclear ubiquitous casein and cyclin-dependent kinase substrate 1	NUCKS1
mun-novel31-3p	oral cancer-overexpressed protein 1	ORAOV1
mun-novel31-3p	platelet-derived growth factor receptor alpha	PDGFRA
mun-novel31-3p	3-phosphoinositide-dependent protein kinase 1	PDPK1
mun-novel31-3p	prefoldin subunit 3	PFDN3
mun-novel31-3p	phytanoyl-CoA dioxygenase, peroxisomal	PHYH
mun-novel31-3p	DNA-directed RNA polymerase III subunit RPC6	POLR3F
mun-novel31-3p	neurabin-1	PPP1R9A
mun-novel31-3p	peroxiredoxin-1	PRDX1
mun-novel31-3p	paxillin	PXN
mun-novel31-3p	ras-related protein Rab-22A	RAB22A
mun-novel31-3p	ras-related C3 botulinum toxin substrate 3	RAC3
mun-novel31-3p	ras-related protein Ral-A	RALA
mun-novel31-3p	RNA-binding protein 39	RBM39
mun-novel31-3p	transcription factor RFX4	RFX4
mun-novel31-3p	probable E3 ubiquitin-protein ligase RNF217	RNF217
mun-novel31-3p	sal-like protein 1	SALL1
mun-novel31-3p	syndecan-4	SDC4
mun-novel31-3p	high affinity copper uptake protein 1	SLC31A1
mun-novel31-3p	serine/threonine-protein kinase SMG1	SMG1
mun-novel31-3p	small integral membrane protein 4	SMIM4
mun-novel31-3p	sorting nexin-4	SNX4
mun-novel31-3p	spermatogenesis-associated protein 2	SPATA2
mun-novel31-3p	serine/arginine-rich splicing factor 2	SRSF2
mun-novel31-3p	suppression of tumorigenicity 5 protein	ST5
mun-novel31-3p	TATA-box-binding protein	TBP
mun-novel31-3p	mitochondrial import inner membrane translocase subunit Tim9	TIMM9
mun-novel31-3p	promethin	TMEM159
mun-novel31-3p	tropomodulin-3	TMOD3
mun-novel31-3p	transmembrane and TPR repeat-containing protein 1	TMTC1
mun-novel31-3p	tRNA (adenine(58)-N(1))-methyltransferase catalytic subunit TRMT61A	TRMT61A
mun-novel31-3p	tetratricopeptide repeat protein 17	TTC17
mun-novel31-3p	tetratricopeptide repeat protein 37	TTC37
mun-novel31-3p	E3 ubiquitin-protein ligase UHRF2	UHRF2
mun-novel31-3p	methylosome protein 50	WDR77
mun-novel31-3p	WD repeat domain phosphoinositide-interacting protein 1	WIPI1
mun-novel31-3p	yorkie	YAP1
mun-novel31-3p	zinc finger protein 384	ZNF384
mun-novel36-3p	probable phospholipid-transporting ATPase IA	ATP8A1
mun-novel36-3p	C3orf26	C3orf26
mun-novel36-3p	calnexin	CANX
mun-novel36-3p	peripheral plasma membrane protein CASK	CASK
mun-novel36-3p	caveolin-1	CAV1
mun-novel36-3p	coiled-coil domain-containing protein 39	CCDC39
mun-novel36-3p	protein CDV3	CDV3
mun-novel36-3p	4-hydroxybenzoate polyprenyltransferase, mitochondrial	COQ2
mun-novel36-3p	C-terminal-binding protein 1	CTBP1
mun-novel36-3p	ATP-dependent RNA helicase DDX18	DDX18
mun-novel36-3p	derlin-2	DERL2
mun-novel36-3p	transcription factor E2F5	E2F5
mun-novel36-3p	EF-hand calcium-binding domain-containing protein 14	EFCAB14
mun-novel36-3p	ELMO domain-containing protein 1	ELMOD1
mun-novel36-3p	enhancer of polycomb 1	EPC1
mun-novel36-3p	epidermal growth factor receptor substrate 15	EPS15
mun-novel36-3p	eukaryotic peptide chain release factor subunit 1	ETF1
mun-novel36-3p	fidgetin	FIGN
mun-novel36-3p	forkhead box protein P2	FOXP2
mun-novel36-3p	polypeptide N-acetylgalactosaminyltransferase-like 6	GALNTL6
mun-novel36-3p	guanine nucleotide-binding protein G(olf) subunit alpha	GNAL
mun-novel36-3p	metabotropic glutamate receptor 8	GRM8
mun-novel36-3p	DNA-binding protein inhibitor ID-4	ID4
mun-novel36-3p	potassium voltage-gated channel subfamily F member 1	KCNF1
mun-novel36-3p	UPF0606 protein KIAA1549	KIAA1549
mun-novel36-3p	kelch-like protein 14	KLHL14
mun-novel36-3p	KRR1 small subunit processome component	KRR1
mun-novel36-3p	protein lin-28 B	LIN28B
mun-novel36-3p	ensconsin	MAP7
mun-novel36-3p	myelin basic protein	MBP
mun-novel36-3p	netrin-G1	NTNG1
mun-novel36-3p	cAMP-dependent protein kinase inhibitor alpha	PKIA
mun-novel36-3p	pinin	PNN
mun-novel36-3p	prolyl endopeptidase	PREP
mun-novel36-3p	receptor-type tyrosine-protein phosphatase F	PTPRF
mun-novel36-3p	double-strand-break repair protein rad21	RAD21
mun-novel36-3p	E3 ubiquitin-protein ligase RNF149	RNF149
mun-novel36-3p	protein SOGA3	SOGA3
mun-novel36-3p	tyrosyl-DNA phosphodiesterase 1	TDP1
mun-novel36-3p	methylcytosine dioxygenase TET2	TET2
mun-novel36-3p	THUMP domain-containing protein 3	THUMPD3
mun-novel36-3p	tight junction protein ZO-1	TJP1
mun-novel36-3p	transforming growth factor beta-3	TLE3
mun-novel36-3p	ubiquitin-conjugating enzyme E2 D1	UBE2D1
mun-novel36-3p	E3 ubiquitin-protein ligase UBR4	UBR4
mun-novel36-3p	ubiquitin carboxyl-terminal hydrolase 37	USP37
mun-novel36-3p	WD repeat-containing protein 47	WDR47
mun-novel36-3p	exportin-6	XPO6
mun-novel36-3p	YEATS domain-containing protein 4	YEATS4
mun-novel36-3p	AN1-type zinc finger protein 3	ZFAND3
mun-novel45-3p	alpha/beta hydrolase domain-containing protein 17C	ABHD17C
mun-novel45-3p	ankyrin repeat and BTB/POZ domain-containing protein 1	ABTB1
mun-novel45-3p	A disintegrin and metalloproteinase with thrombospondin motifs 17	ADAMTS17
mun-novel45-3p	adenosine kinase	ADK
mun-novel45-3p	aftiphilin	AFTPH
mun-novel45-3p	axin interactor, dorsalization-associated protein	AIDA
mun-novel45-3p	anaphase-promoting complex subunit 7	ANAPC7
mun-novel45-3p	actin-related protein 8	ARP8
mun-novel45-3p	actin-related protein 2/3 complex subunit 3	ARPC3
mun-novel45-3p	ubiquitin-like protein ATG12	ATG12
mun-novel45-3p	V-type proton ATPase subunit C 1	ATP6V1C1
mun-novel45-3p	V-type proton ATPase subunit D	ATP6V1D
mun-novel45-3p	V-type proton ATPase subunit G 1	ATP6V1G1
mun-novel45-3p	ataxin-7-like protein 1	ATXN7L1
mun-novel45-3p	BEN domain-containing protein 4	BEND4
mun-novel45-3p	basic immunoglobulin-like variable motif-containing protein	BIVM
mun-novel45-3p	bromodomain-containing protein 7	BRD7
mun-novel45-3p	BTB/POZ domain-containing protein 2	BTBD2
mun-novel45-3p	UPF0536 protein C12orf66	C12orf66
mun-novel45-3p	UPF0183 protein C16orf70	C16orf70
mun-novel45-3p	CDK5 and ABL1 enzyme substrate 1	CABLES1
mun-novel45-3p	voltage-dependent L-type calcium channel subunit alpha-1D	CACNA1D
mun-novel45-3p	cell adhesion molecule 2	CADM2
mun-novel45-3p	calcium/calmodulin-dependent protein kinase type 1D	CAMK1D
mun-novel45-3p	calcium/calmodulin-dependent protein kinase kinase 2	CAMKK2
mun-novel45-3p	pre-mRNA-processing factor 17	CDC40
mun-novel45-3p	parafibromin	CDC73
mun-novel45-3p	CDKN2A-interacting protein	CDKN2AIP
mun-novel45-3p	mitochondrial intermembrane space import and assembly protein 40	CHCHD4
mun-novel45-3p	E3 ubiquitin-protein ligase CHFR	CHFR
mun-novel45-3p	carbohydrate sulfotransferase 1	CHST1
mun-novel45-3p	cytoskeleton-associated protein 5	CKAP5
mun-novel45-3p	N-acylneuraminate cytidylyltransferase	CMAS
mun-novel45-3p	conserved oligomeric Golgi complex subunit 6	COG6
mun-novel45-3p	copine-7	CPNE7
mun-novel45-3p	CUB and sushi domain-containing protein 3	CSMD3
mun-novel45-3p	cytoglobin	CYGB
mun-novel45-3p	C-myc promoter-binding protein	DENND4A
mun-novel45-3p	disco-interacting protein 2 C	DIP2C
mun-novel45-3p	putative tyrosine-protein phosphatase auxilin	DNAJC6
mun-novel45-3p	dynamin-1	DNM1
mun-novel45-3p	D-tyrosyl-tRNA(Tyr) deacylase 1	DTD1
mun-novel45-3p	delta and Notch-like epidermal growth factor-related receptor	EGF
mun-novel45-3p	ETS-related transcription factor Elf-1	ELF1
mun-novel45-3p	band 4.1-like protein 2	EPB41L2
mun-novel45-3p	estrogen-related receptor gamma	ESRRG
mun-novel45-3p	protein FAM19A2	FAM19A2
mun-novel45-3p	seprase	FAP
mun-novel45-3p	F-box/WD repeat-containing protein 11	FBXW11
mun-novel45-3p	protein FEV	FEV
mun-novel45-3p	leucine-rich repeat transmembrane protein FLRT2	FLRT2
mun-novel45-3p	forkhead box protein P1	FOXP1
mun-novel45-3p	glucose-induced degradation protein 4	GID4
mun-novel45-3p	glucose-induced degradation protein 8	GID8
mun-novel45-3p	gap junction gamma-1 protein	GJC1
mun-novel45-3p	lactoylglutathione lyase	GLO1
mun-novel45-3p	glycine receptor subunit alpha-2	GLRA2L
mun-novel45-3p	Golgi phosphoprotein 3	GOLPH3
mun-novel45-3p	neuronal membrane glycoprotein M6-b	GPM6B
mun-novel45-3p	glutamate receptor 2	GRIA2
mun-novel45-3p	glutamate receptor ionotropic, kainate 2	GRIK2
mun-novel45-3p	heat-stable enterotoxin receptor	GUCY2C
mun-novel45-3p	hypoxia-inducible factor 1-alpha	HIF1A
mun-novel45-3p	homeobox-containing protein 1	HMBOX1
mun-novel45-3p	heterogeneous nuclear ribonucleoprotein A3	HNRNPA3
mun-novel45-3p	intraflagellar transport protein 52	IFT52
mun-novel45-3p	cation-independent mannose-6-phosphate receptor	IGF2R
mun-novel45-3p	DNA helicase INO80	INO80
mun-novel45-3p	type II inositol 1,4,5-trisphosphate 5-phosphatase	INPP5B
mun-novel45-3p	insulin-induced gene 1 protein	INSIG1
mun-novel45-3p	inositol 1,4,5-trisphosphate receptor type 1	ITPR1
mun-novel45-3p	potassium voltage-gated channel subfamily S member 2	KCNS2
mun-novel45-3p	BTB/POZ domain-containing protein KCTD8	KCTD8
mun-novel45-3p	lysine-specific demethylase 6A	KDM6A
mun-novel45-3p	KIF1-binding protein	KIF1BP
mun-novel45-3p	kinesin-associated protein 3	KIFAP3
mun-novel45-3p	kelch-like protein 29	KLHL29
mun-novel45-3p	kelch-like protein 3	KLHL3
mun-novel45-3p	protein LAP2	LAP2
mun-novel45-3p	LIM/homeobox protein Lhx6	LHX6
mun-novel45-3p	protein lin-7 A	LIN7A
mun-novel45-3p	LYR motif-containing protein 2	LYRM2
mun-novel45-3p	microtubule-associated proteins 1A/1B light chain 3B	MAP1LC3B
mun-novel45-3p	muscleblind-like protein 2	MBNL2
mun-novel45-3p	mediator of RNA polymerase II transcription subunit 13	MED13
mun-novel45-3p	methionine aminopeptidase 1	METAP1
mun-novel45-3p	myotubularin-related protein 2	MTMR2
mun-novel45-3p	methionine synthase reductase	MTRR
mun-novel45-3p	neuron navigator 2	NAV2
mun-novel45-3p	bifunctional protein NCOAT	NCOAT
mun-novel45-3p	nuclear receptor corepressor 1	NCOR1
mun-novel45-3p	nuclear transcription factor Y subunit gamma	NFYC
mun-novel45-3p	nuclear receptor subfamily 4 group A member 3	NR4A3
mun-novel45-3p	neuropilin-1	NRP1
mun-novel45-3p	cytosolic Fe-S cluster assembly factor NUBP2	NUBP2
mun-novel45-3p	noelin-3	OLFM3
mun-novel45-3p	propionyl-CoA carboxylase alpha chain, mitochondrial	PCCA
mun-novel45-3p	cone cGMP-specific 3',5'-cyclic phosphodiesterase subunit alpha'	PDE6C
mun-novel45-3p	platelet-derived growth factor receptor alpha	PDGFRA
mun-novel45-3p	peroxisomal trans-2-enoyl-CoA reductase	PECR
mun-novel45-3p	PHD finger protein 21A	PHF21A
mun-novel45-3p	phospholipase A1 member A	PLA1A
mun-novel45-3p	procollagen-lysine,2-oxoglutarate 5-dioxygenase 2	PLOD1
mun-novel45-3p	DNA polymerase alpha catalytic subunit	POLA1
mun-novel45-3p	ribonuclease P/MRP protein subunit POP5	POP5
mun-novel45-3p	serine/threonine-protein phosphatase 2B catalytic subunit beta isoform	PPP3CB
mun-novel45-3p	cAMP-dependent protein kinase catalytic subunit beta	PRKACB
mun-novel45-3p	pre-mRNA-splicing factor 38B	PRPF38B
mun-novel45-3p	26S proteasome non-ATPase regulatory subunit 12	PSMD12
mun-novel45-3p	tyrosine-protein phosphatase non-receptor type 1	PTPN1
mun-novel45-3p	receptor-type tyrosine-protein phosphatase mu	PTPRM
mun-novel45-3p	6-pyruvoyl tetrahydrobiopterin synthase	PTS
mun-novel45-3p	PX domain-containing protein 1	PXDC1
mun-novel45-3p	ras-related protein Rab-35	RAB35
mun-novel45-3p	RNA-binding Raly-like protein	RALYL
mun-novel45-3p	rap guanine nucleotide exchange factor 2	RAPGEF2
mun-novel45-3p	probable arginine--tRNA ligase, mitochondrial	RARS2
mun-novel45-3p	ras guanyl-releasing protein 3	RASGRP3
mun-novel45-3p	RNA-binding protein 12	RBM12
mun-novel45-3p	RNA-binding protein 25	RBM25
mun-novel45-3p	E3 ubiquitin-protein ligase RING2	RING2
mun-novel45-3p	ras-responsive element-binding protein 1	RREB1
mun-novel45-3p	RUN domain-containing protein 3B	RUNDC3B
mun-novel45-3p	sterile alpha motif domain-containing protein 12	SAMD12
mun-novel45-3p	semaphorin-3A	SEMA3A
mun-novel45-3p	sentrin-specific protease 6	SENP6
mun-novel45-3p	neuronal-specific septin-3	SEPT3
mun-novel45-3p	septin-6	SEPT6
mun-novel45-3p	solute carrier family 12 member 4	SLC12A4
mun-novel45-3p	zinc transporter 9	SLC30A9
mun-novel45-3p	putative sodium-coupled neutral amino acid transporter 9	SLC38A9
mun-novel45-3p	protein SMG7	SMG7
mun-novel45-3p	zinc finger protein SNAI2	SNAI2
mun-novel45-3p	sorting nexin-10	SNX10
mun-novel45-3p	suppressor of cytokine signaling 5	SOCS5
mun-novel45-3p	suppressor of cytokine signaling 6	SOCS6
mun-novel45-3p	SPARC	SPARC
mun-novel45-3p	transcription elongation factor SPT4	SPT4
mun-novel45-3p	signal recognition particle 54 kDa protein	SRP54
mun-novel45-3p	lupus La protein	SSB
mun-novel45-3p	cohesin subunit SA-1	STAG1
mun-novel45-3p	striatin	STRN
mun-novel45-3p	brachyury protein	T Gene
mun-novel45-3p	transcription initiation factor TFIID subunit 4	TAF4
mun-novel45-3p	transcription initiation factor TFIID subunit 5	TAF5
mun-novel45-3p	threonine aspartase 1	TASP1
mun-novel45-3p	methylcytosine dioxygenase TET2	TET2
mun-novel45-3p	TGF-beta receptor type-2	TGFBR2
mun-novel45-3p	thrombospondin type-1 domain-containing protein 4	THSD4
mun-novel45-3p	thrombospondin type-1 domain-containing protein 7B	THSD7B
mun-novel45-3p	transmembrane and coiled-coil domains protein 1	TMCC1
mun-novel45-3p	transmembrane protein 233	TMEM233
mun-novel45-3p	lamina-associated polypeptide 2, isoforms beta/delta/epsilon/gamma	TMPO
mun-novel45-3p	traf2 and NCK-interacting protein kinase	TNIK
mun-novel45-3p	metalloprotease TIKI2	TRABD2B
mun-novel45-3p	tRNA methyltransferase 10 A	TRMT10A
mun-novel45-3p	tetratricopeptide repeat protein 9A	TTC9A
mun-novel45-3p	tubulin--tyrosine ligase	TTL
mun-novel45-3p	SUMO-activating enzyme subunit 2	UBA2
mun-novel45-3p	polyubiquitin-B	UBB
mun-novel45-3p	polyubiquitin-B	UBB
mun-novel45-3p	ubiquitin-conjugating enzyme E2 G1	UBE2G1
mun-novel45-3p	serine/threonine-protein kinase ULK2	ULK2
mun-novel45-3p	ubiquitin carboxyl-terminal hydrolase 25	USP25
mun-novel45-3p	rRNA-processing protein UTP23	UTP23
mun-novel45-3p	vacuolar protein sorting-associated protein 18	VPS18
mun-novel45-3p	protein N-terminal glutamine amidohydrolase	WDYHV1
mun-novel45-3p	WW domain-containing oxidoreductase	WWOX
mun-novel45-3p	zinc finger and BTB domain-containing protein 2	ZBTB2
mun-novel45-3p	probable palmitoyltransferase ZDHHC20	ZDHHC20
mun-novel45-3p	zinc finger protein 319	ZNF391
mun-novel46-3p	EGF, latrophilin and seven transmembrane domain-containing protein 1	ADGRL4
mun-novel46-3p	AFG3-like protein 2	AFG3L2
mun-novel46-3p	APC membrane recruitment protein 2	AMER2
mun-novel46-3p	AP-2 complex subunit mu	AP2M1
mun-novel46-3p	E3 ubiquitin-protein ligase ARIH2	ARIH2
mun-novel46-3p	actin-related protein 3B	ARP3B
mun-novel46-3p	copper transport protein ATOX1	ATOX1
mun-novel46-3p	sarcoplasmic/endoplasmic reticulum calcium ATPase 2	ATP2A2
mun-novel46-3p	autism susceptibility gene 2 protein	AUTS2
mun-novel46-3p	voltage-dependent L-type calcium channel subunit beta-2	CACNB2
mun-novel46-3p	calmodulin	CaM
mun-novel46-3p	adapter molecule crk	CRK
mun-novel46-3p	stromal cell-derived factor 1	CXCL12
mun-novel46-3p	dihydrolipoyl dehydrogenase, mitochondrial	DLD
mun-novel46-3p	delta-like protein 4	DLL4
mun-novel46-3p	zinc finger protein DPF3	DPF3
mun-novel46-3p	dual specificity protein phosphatase 19	DUSP19
mun-novel46-3p	ER membrane protein complex subunit 1	EMC1
mun-novel46-3p	ephrin type-A receptor 5	EPHA5
mun-novel46-3p	estrogen-related receptor gamma	ESRRG
mun-novel46-3p	F-box/LRR-repeat protein 2	FBXL2
mun-novel46-3p	fragile X mental retardation protein 1 B	FMR1
mun-novel46-3p	ras GTPase-activating protein-binding protein 1	G3BP1
mun-novel46-3p	N-acetylgalactosaminyltransferase 7	GALNT7
mun-novel46-3p	GPI mannosyltransferase 3	GPI10
mun-novel46-3p	grpE protein 1, mitochondrial	GRPEL1
mun-novel46-3p	hypoxia-inducible factor 1-alpha inhibitor	HIF1AN
mun-novel46-3p	heterogeneous nuclear ribonucleoprotein K	HNRNPK
mun-novel46-3p	cysteine-rich protein 2-binding protein	KAT14
mun-novel46-3p	kelch repeat and BTB domain-containing protein 11	KBTBD11
mun-novel46-3p	BTB/POZ domain-containing protein KCTD7	KCTD7
mun-novel46-3p	lysine-specific demethylase 3B	KDM3B
mun-novel46-3p	KH domain-containing, RNA-binding, signal transduction-associated protein 3	KHDRBS3
mun-novel46-3p	kelch domain-containing protein 2	KLHDC2
mun-novel46-3p	kelch-like protein 13	KLHL13
mun-novel46-3p	lysosome-associated membrane glycoprotein 1	LAMP1
mun-novel46-3p	la-related protein 7	LARP7
mun-novel46-3p	leucine-rich repeat transmembrane neuronal protein 2	LRRTM2
mun-novel46-3p	mitogen-activated protein kinase kinase kinase kinase 3	MAP4K3
mun-novel46-3p	mitogen-activated protein kinase 11	MAPK11
mun-novel46-3p	c-Jun-amino-terminal kinase-interacting protein 4	MAPK8IP4
mun-novel46-3p	E3 ubiquitin-protein ligase MARCH11	MARCH11
mun-novel46-3p	muscleblind-like protein 1	MBNL1
mun-novel46-3p	myelin basic protein	MBP
mun-novel46-3p	homeobox protein Meis2	MEIS2
mun-novel46-3p	protein-methionine sulfoxide oxidase MICAL3	MICAL3
mun-novel46-3p	39S ribosomal protein L15, mitochondrial	MRPL15
mun-novel46-3p	39S ribosomal protein L32, mitochondrial	MRPL32
mun-novel46-3p	serine/threonine-protein kinase NLK	NLK
mun-novel46-3p	mineralocorticoid receptor	NR3C2
mun-novel46-3p	NMDA receptor synaptonuclear signaling and neuronal migration factor	NSMF
mun-novel46-3p	obg-like ATPase 1	OLA1
mun-novel46-3p	protocadherin-20	PCDH20
mun-novel46-3p	PERQ amino acid-rich with GYF domain-containing protein 2	PERQ2
mun-novel46-3p	serine/threonine-protein phosphatase 2A regulatory subunit B'' subunit beta	PPP2R3B
mun-novel46-3p	ras-related protein Rab-5C	RAB5C
mun-novel46-3p	cell cycle checkpoint protein RAD1	RAD1
mun-novel46-3p	ras-related protein Ral-A	RALA
mun-novel46-3p	RNA-binding Raly-like protein	RALYL
mun-novel46-3p	semaphorin-6D	SEMA6D
mun-novel46-3p	protein SET	SET
mun-novel46-3p	large neutral amino acids transporter small subunit 4	SLC43A2
mun-novel46-3p	serine palmitoyltransferase 2	SPTLC2
mun-novel46-3p	serine/arginine-rich splicing factor 10	SRSF10
mun-novel46-3p	serine/threonine-protein kinase 24	STK24
mun-novel46-3p	stathmin-2	STMN2
mun-novel46-3p	mitochondrial translocator assembly and maintenance protein 41	TAMM41
mun-novel46-3p	threonine aspartase 1	TASP1
mun-novel46-3p	TBC1 domain family member 8	TBC1D8
mun-novel46-3p	transmembrane protein 41A	TMEM41A
mun-novel46-3p	trophoblast glycoprotein	TPBG
mun-novel46-3p	gamma-tubulin complex component 3	TUBGCP3
mun-novel46-3p	thioredoxin, mitochondrial	TXN2
mun-novel46-3p	netrin receptor UNC5C	UNC5C
mun-novel46-3p	uroporphyrinogen-III synthase	UROS
mun-novel46-3p	WD and tetratricopeptide repeats protein 1	WDTC1
mun-novel46-3p	protein WWC2	WWC2
mun-novel46-3p	palmitoyltransferase ZDHHC13	ZDHHC13
mun-novel66-3p	adenosine receptor A2a	ADORA2A
mun-novel66-3p	ankyrin repeat domain-containing protein 17	ANKRD17
mun-novel66-3p	ADP-ribosylation factor 1	ARF1
mun-novel66-3p	E3 ubiquitin-protein ligase ARIH2	ARIH2
mun-novel66-3p	ADP-ribosylation factor-like protein 5A	ARL5A
mun-novel66-3p	PRA1 family protein 3	ARL6IP5
mun-novel66-3p	actin-related protein 2	ARP2
mun-novel66-3p	B9 domain-containing protein 1	B9D1
mun-novel66-3p	bone morphogenetic protein receptor type-1B	BMPR1B
mun-novel66-3p	nucleosome-remodeling factor subunit BPTF	BPTF
mun-novel66-3p	bromodomain-containing protein 7	BRD7
mun-novel66-3p	bystin	BYSL
mun-novel66-3p	UPF0183 protein C16orf70	C16orf70
mun-novel66-3p	calcium-binding protein 1	CABP1
mun-novel66-3p	core-binding factor subunit beta	CBFB
mun-novel66-3p	cadherin-11	CDH11
mun-novel66-3p	cadherin-6	CDH6
mun-novel66-3p	chordin-like protein 1	CHRDL1
mun-novel66-3p	CCR4-NOT transcription complex subunit 11	CNOT11
mun-novel66-3p	conserved oligomeric Golgi complex subunit 6	COG6
mun-novel66-3p	COP9 signalosome complex subunit 2	COPS2
mun-novel66-3p	casein kinase II subunit alpha'	CSNK2A2
mun-novel66-3p	cleavage stimulation factor subunit 1	CSTF1
mun-novel66-3p	cullin-3	CUL3
mun-novel66-3p	discoidin, CUB and LCCL domain-containing protein 1	DCBLD1
mun-novel66-3p	ATP-dependent RNA helicase DDX3X	DDX3X
mun-novel66-3p	disco-interacting protein 2 B	DIP2B
mun-novel66-3p	putative tyrosine-protein phosphatase auxilin	DNAJC6
mun-novel66-3p	endothelial differentiation-related factor 1	EDF1
mun-novel66-3p	translation initiation factor eIF-2B subunit beta	EIF2B2
mun-novel66-3p	eukaryotic peptide chain release factor subunit 1	ETF1
mun-novel66-3p	transcription factor ETV6	ETV6
mun-novel66-3p	protein FAM173B	FAM173B
mun-novel66-3p	protein FAM19A1	FAM19A1
mun-novel66-3p	UAP56-interacting factor	FYTTD1
mun-novel66-3p	gamma-aminobutyric acid receptor subunit alpha-1	GABRA1
mun-novel66-3p	polypeptide N-acetylgalactosaminyltransferase 1	GALNT1
mun-novel66-3p	putative oxidoreductase GLYR1	GLYR1
mun-novel66-3p	guanine nucleotide-binding protein G(k) subunit alpha	GNAI3
mun-novel66-3p	glycosyltransferase-like domain-containing protein 1	GTDC1
mun-novel66-3p	histone deacetylase 8	HDAC8
mun-novel66-3p	heterogeneous nuclear ribonucleoproteins A2/B1	HNRNPA2B1
mun-novel66-3p	homeobox protein Hox-B5	HOXB5
mun-novel66-3p	stress-70 protein, mitochondrial	HSPA9
mun-novel66-3p	DNA-binding protein inhibitor ID-2	ID2
mun-novel66-3p	interleukin-18 receptor 1	IL18R1
mun-novel66-3p	ras GTPase-activating-like protein IQGAP2	IQGAP2
mun-novel66-3p	integral membrane protein 2A	ITM2A
mun-novel66-3p	KN motif and ankyrin repeat domain-containing protein 1	KANK1
mun-novel66-3p	Krueppel-like factor 6	KLF6
mun-novel66-3p	lissencephaly-1	LIS1
mun-novel66-3p	O-acetyl-ADP-ribose deacetylase MACROD2	MACROD2
mun-novel66-3p	mediator of RNA polymerase II transcription subunit 9	MED9
mun-novel66-3p	calcium uptake protein 3, mitochondrial	MICU3
mun-novel66-3p	matrix-remodeling-associated protein 5	MXRA5
mun-novel66-3p	N-alpha-acetyltransferase 15, NatA auxiliary subunit	NAA15
mun-novel66-3p	bifunctional protein NCOAT	NCOAT
mun-novel66-3p	polynucleotide 5'-hydroxyl-kinase NOL9	NOL9
mun-novel66-3p	nuclear receptor subfamily 4 group A member 3	NR4A3
mun-novel66-3p	opioid growth factor receptor	OGFR
mun-novel66-3p	ornithine carbamoyltransferase, mitochondrial	OTC
mun-novel66-3p	proteinase-activated receptor 3	PAR3
mun-novel66-3p	inaD-like protein	PATJ
mun-novel66-3p	protein-L-isoaspartate O-methyltransferase domain-containing protein 2	PCMTD2
mun-novel66-3p	high affinity cAMP-specific and IBMX-insensitive 3',5'-cyclic phosphodiesterase 8B	PDE8B
mun-novel66-3p	membrane-associated progesterone receptor component 2	PGRMC2
mun-novel66-3p	phosphatase and actin regulator 3	PHACTR3
mun-novel66-3p	5-phosphohydroxy-L-lysine phospho-lyase	PHYKPL
mun-novel66-3p	PTB-containing, cubilin and LRP1-interacting protein	PID1
mun-novel66-3p	cAMP-dependent protein kinase inhibitor alpha	PKIA
mun-novel66-3p	DNA-directed RNA polymerase II subunit RPB11-a	POLR2J
mun-novel66-3p	phosphoribosyl pyrophosphate synthase-associated protein 1	PRPSAP1
mun-novel66-3p	protein tyrosine phosphatase type IVA 2	PTP4A2
mun-novel66-3p	receptor-type tyrosine-protein phosphatase F	PTPRF
mun-novel66-3p	pumilio 1	PUM1
mun-novel66-3p	paxillin	PXN
mun-novel66-3p	ras-related protein Rab-12	RAB12
mun-novel66-3p	geranylgeranyl transferase type-2 subunit beta	RABGGTB
mun-novel66-3p	rap guanine nucleotide exchange factor 2	RAPGEF2
mun-novel66-3p	RNA-binding protein 12	RBM12
mun-novel66-3p	GTP-binding protein Rhes	RHEB
mun-novel66-3p	R-spondin-3	RSPO3
mun-novel66-3p	protein SCAF8	SCAF8
mun-novel66-3p	semaphorin-6D	SEMA6D
mun-novel66-3p	S-phase kinase-associated protein 1	SKP1
mun-novel66-3p	ADP/ATP translocase 3	SLC25A6
mun-novel66-3p	CMP-sialic acid transporter	SLC35A1
mun-novel66-3p	sodium- and chloride-dependent GABA transporter 2	SLC6A13
mun-novel66-3p	transcription factor SOX-10	SOX10
mun-novel66-3p	spermatogenesis-associated protein 7	SPATA7
mun-novel66-3p	lupus La protein	SSB
mun-novel66-3p	beta-galactoside alpha-2,6-sialyltransferase 2	ST6GAL1
mun-novel66-3p	double-stranded RNA-binding protein Staufen 2	STAU2
mun-novel66-3p	heterogeneous nuclear ribonucleoprotein Q	SYNCRIP
mun-novel66-3p	synaptogyrin-1	SYNGR1
mun-novel66-3p	TBC1 domain family member 9B	TBC1D9B
mun-novel66-3p	T-lymphoma invasion and metastasis-inducing protein 2	TIAM2
mun-novel66-3p	mitochondrial import inner membrane translocase subunit Tim23	TIMM23
mun-novel66-3p	trafficking protein particle complex subunit 11	TRAPPC11
mun-novel66-3p	tribbles 2	TRIB2
mun-novel66-3p	tetratricopeptide repeat protein 9A	TTC9A
mun-novel66-3p	thioredoxin domain-containing protein 12	TXNDC12
mun-novel66-3p	ubiquitin-conjugating enzyme E2 L3	UBE2L3
mun-novel66-3p	regulator of nonsense transcripts 2	UPF2
mun-novel66-3p	ubiquitin carboxyl-terminal hydrolase 34	USP34
mun-novel66-3p	WW domain-containing adapter protein with coiled-coil	WAC
mun-novel66-3p	WW domain-binding protein 2	WBP2
mun-novel66-3p	tRNA (guanine-N(7)-)-methyltransferase subunit WDR4	WDR4
mun-novel66-3p	YEATS domain-containing protein 4	YEATS4
mun-novel66-3p	protein YIPF6	YIPF6
mun-novel66-3p	YTH domain family protein 1	YTHDF1
mun-novel66-3p	probable palmitoyltransferase ZDHHC23	ZDHHC23
mun-novel66-3p	zinc finger FYVE domain-containing protein 19	ZFYVE19
mun-novel66-3p	zinc finger protein 462	ZNF462
mun-novel68-3p	double-stranded RNA-specific editase B2	ADARB2
mun-novel68-3p	1,2-dihydroxy-3-keto-5-methylthiopentene dioxygenase	ADI1
mun-novel68-3p	arf-GAP with GTPase, ANK repeat and PH domain-containing protein 1	AGAP1
mun-novel68-3p	protein argonaute-1	AGO1
mun-novel68-3p	probable C->EU-editing enzyme APOBEC-2	APOBEC2
mun-novel68-3p	armadillo repeat protein deleted in velo-cardio-facial syndrome	ARVCF
mun-novel68-3p	antizyme inhibitor 1	AZIN1
mun-novel68-3p	UDP-GalNAc:beta-1,3-N-acetylgalactosaminyltransferase 2	B3GALNT2
mun-novel68-3p	bone morphogenetic protein 7	BMP7
mun-novel68-3p	complement component 1 Q subcomponent-binding protein, mitochondrial	C1QBP
mun-novel68-3p	voltage-dependent L-type calcium channel subunit beta-2	CACNB2
mun-novel68-3p	voltage-dependent L-type calcium channel subunit beta-4	CACNB4
mun-novel68-3p	calcium-dependent secretion activator 1	CADPS
mun-novel68-3p	parafibromin	CDC73
mun-novel68-3p	cell differentiation protein RCD1	CNOT9
mun-novel68-3p	cleavage and polyadenylation specificity factor subunit 3	CPSF3
mun-novel68-3p	corticotropin-releasing factor-binding protein	CRF
mun-novel68-3p	casein kinase I isoform gamma-3	CSNK1G3
mun-novel68-3p	DCN1-like protein 2	DCUN1D2
mun-novel68-3p	desumoylating isopeptidase 1	DESI1
mun-novel68-3p	dual specificity protein phosphatase 1	DUSP1
mun-novel68-3p	dual specificity protein phosphatase 6	DUSP6
mun-novel68-3p	receptor-binding cancer antigen expressed on SiSo cells	EBAG9
mun-novel68-3p	transcription factor COE2	EBF2
mun-novel68-3p	translation initiation factor eIF-2B subunit delta	EIF2B2
mun-novel68-3p	eukaryotic translation initiation factor 5A-2	EIF5A2
mun-novel68-3p	ELAV-like protein 4	ELAVL2
mun-novel68-3p	glutamyl aminopeptidase	ENPEP
mun-novel68-3p	FAS-associated factor 2	FAF2
mun-novel68-3p	protein FAM132A	FAM132A
mun-novel68-3p	fibulin-5	FBLN5
mun-novel68-3p	F-box/SPRY domain-containing protein 1	FBXO45
mun-novel68-3p	fez family zinc finger protein 2	FEZF2
mun-novel68-3p	frizzled-8	FZD8
mun-novel68-3p	ADP-ribosylation factor-binding protein GGA3	GGA3
mun-novel68-3p	geranylgeranyl pyrophosphate synthase	GGPS1
mun-novel68-3p	guanine nucleotide-binding protein subunit beta-4	GNB4
mun-novel68-3p	vasculin-like protein 1	GPBP1L1
mun-novel68-3p	glutamate receptor 4	GRIA4
mun-novel68-3p	gastrin-releasing peptide	GRP
mun-novel68-3p	hypoxia-inducible factor 1-alpha	HIF1A
mun-novel68-3p	homeobox protein Hox-A3	HOXA3
mun-novel68-3p	homeobox protein Hox-A6	HOXA6
mun-novel68-3p	heparan-sulfate 6-O-sulfotransferase 2	HS6ST2
mun-novel68-3p	heat shock factor protein 2	HSF2
mun-novel68-3p	voltage-gated hydrogen channel 1	HVCN1
mun-novel68-3p	insulin-like growth factor 2 mRNA-binding protein 3	IGF2BP3
mun-novel68-3p	inhibitor of growth protein 4	ING4
mun-novel68-3p	KDEL motif-containing protein 2	KDELC2
mun-novel68-3p	ragulator complex protein LAMTOR3	LAMTOR3
mun-novel68-3p	ligand-dependent corepressor	LCOR
mun-novel68-3p	galectin-related protein	LGALSL
mun-novel68-3p	lipoma HMGIC fusion partner	LHFP
mun-novel68-3p	leucine-rich repeat and immunoglobulin-like domain-containing nogo receptor-interacting protein 1	LINGO1
mun-novel68-3p	protein LSM14 A	LSM14A
mun-novel68-3p	leucine zipper protein 2	LUZP2
mun-novel68-3p	matrilin-4	MATN4
mun-novel68-3p	monocarboxylate transporter 1	MCT1
mun-novel68-3p	MAM domain-containing glycosylphosphatidylinositol anchor protein 2	MDGA2
mun-novel68-3p	mediator of RNA polymerase II transcription subunit 1	MED1
mun-novel68-3p	mediator of RNA polymerase II transcription subunit 8	MED8
mun-novel68-3p	mitofusin-2	MFN2
mun-novel68-3p	protein-methionine sulfoxide oxidase MICAL3	MICAL3
mun-novel68-3p	mirror-image polydactyly gene 1 protein	MIPOL1
mun-novel68-3p	malectin	MLEC
mun-novel68-3p	39S ribosomal protein L46, mitochondrial	MRPL46
mun-novel68-3p	nucleosome assembly protein 1-like 4	NAP1L4
mun-novel68-3p	nuclear cap-binding protein subunit 2	NCBP2
mun-novel68-3p	norrin	NDP
mun-novel68-3p	neurofilament medium polypeptide	NEFM
mun-novel68-3p	nucleoredoxin	NXN
mun-novel68-3p	oxysterol-binding protein-related protein 6	OSBPL6
mun-novel68-3p	protein-L-isoaspartate(D-aspartate) O-methyltransferase	PCMT1
mun-novel68-3p	phosphoglycerate mutase 1	PGAM1
mun-novel68-3p	prohibitin-2	PHB2
mun-novel68-3p	arginine/serine-rich protein PNISR	PNISR
mun-novel68-3p	peptidyl-prolyl cis-trans isomerase-like 2	PPIL2
mun-novel68-3p	serine/threonine-protein phosphatase 2A 56 kDa regulatory subunit epsilon isoform	PPP2R5E
mun-novel68-3p	proteasome subunit beta type-2	PSMB2
mun-novel68-3p	paxillin	PXN
mun-novel68-3p	ral GTPase-activating protein subunit alpha-1	RALGAPA1
mun-novel68-3p	RB1-inducible coiled-coil protein 1	RB1CC1
mun-novel68-3p	RNA binding protein fox-1 1	RBFOX1
mun-novel68-3p	serologically defined colon cancer antigen 8	SDCCAG8
mun-novel68-3p	semaphorin-3D	SEMA3D
mun-novel68-3p	SH2 domain-containing adapter protein F	SHF
mun-novel68-3p	SLAIN motif-containing protein 2	SLAIN2
mun-novel68-3p	sodium-dependent noradrenaline transporter	SLC6A2
mun-novel68-3p	gamma-synuclein	SNCG
mun-novel68-3p	beta-1-syntrophin	SNTB1
mun-novel68-3p	transcription elongation factor SPT4	SPT4
mun-novel68-3p	SLIT-ROBO Rho GTPase-activating protein 1	SRGAP1
mun-novel68-3p	spermidine synthase	SRM
mun-novel68-3p	protein TFG	TFG
mun-novel68-3p	tight junction protein ZO-2	TJP2
mun-novel68-3p	tumor necrosis factor receptor superfamily member 11B	TNFRSF11B
mun-novel68-3p	heat shock protein 75 kDa, mitochondrial	TRAP1
mun-novel68-3p	tubby protein	TUB
mun-novel68-3p	YEATS domain-containing protein 4	YEATS4
mun-novel68-3p	zinc finger protein 281	ZNF281
mun-novel7-3p	actin-binding LIM protein 3	ABLIM3
mun-novel7-3p	alpha-actinin-1	ACTN1
mun-novel7-3p	activin receptor type-2A	ACVR2A
mun-novel7-3p	double-stranded RNA-specific editase B2	ADARB2
mun-novel7-3p	adenosine receptor A2a	ADORA2A
mun-novel7-3p	acylglycerol kinase, mitochondrial	AGK
mun-novel7-3p	protein argonaute-3	AGO3
mun-novel7-3p	alcohol dehydrogenase [NADP(+)]	AKR1A1
mun-novel7-3p	RAC-alpha serine/threonine-protein kinase	AKT1
mun-novel7-3p	amyloid beta A4 protein	APP
mun-novel7-3p	apoptosis-resistant E3 ubiquitin protein ligase 1	AREL1
mun-novel7-3p	arrestin domain-containing protein 1	ARRDC1
mun-novel7-3p	histone-lysine N-methyltransferase ASH1L	ASH1L
mun-novel7-3p	autophagy protein 5	ATG5
mun-novel7-3p	antithrombin-III	ATIII
mun-novel7-3p	atlastin-2	ATL2
mun-novel7-3p	V-type proton ATPase catalytic subunit A	ATP6V1A
mun-novel7-3p	ATP synthase mitochondrial F1 complex assembly factor 2	ATPAF2
mun-novel7-3p	5-azacytidine-induced protein 2	AZI2
mun-novel7-3p	BEN domain-containing protein 7	BEND7
mun-novel7-3p	bcl-2-modifying factor	BMF
mun-novel7-3p	bisphosphoglycerate mutase	BPGM
mun-novel7-3p	serine/threonine-protein kinase B-raf	BRAF
mun-novel7-3p	C6orf203	C6orf203
mun-novel7-3p	C7orf26	C7orf26
mun-novel7-3p	carbonic anhydrase 9	CA9
mun-novel7-3p	voltage-dependent L-type calcium channel subunit beta-2	CACNB2
mun-novel7-3p	calcium/calmodulin-dependent protein kinase type II subunit alpha	CAMK2A
mun-novel7-3p	calnexin	CANX
mun-novel7-3p	adenylyl cyclase-associated protein 1	CAP1
mun-novel7-3p	cerebellin-4	CBLN4
mun-novel7-3p	coiled-coil domain-containing protein 102A	CCDC102A
mun-novel7-3p	CD151 antigen	CD151
mun-novel7-3p	cell division control protein 42	CDC42ÃŠ
mun-novel7-3p	cyclin-dependent kinase 17	CDK17
mun-novel7-3p	CCAAT/enhancer-binding protein zeta	CEBPZ
mun-novel7-3p	CUGBP Elav-like family member 1	CELF1
mun-novel7-3p	CUGBP Elav-like family member 2	CELF1
mun-novel7-3p	chromodomain-helicase-DNA-binding protein 4	CHD4
mun-novel7-3p	chromodomain-helicase-DNA-binding protein 9	CHD9
mun-novel7-3p	anamorsin	CIAPIN1
mun-novel7-3p	CLIP-associating protein 2	CLASP2
mun-novel7-3p	C-type lectin domain family 3 member A	CLEC3A
mun-novel7-3p	calsyntenin-1	CLSTN1
mun-novel7-3p	clathrin light chain B	CLTB
mun-novel7-3p	cytosolic non-specific dipeptidase	CNDP2
mun-novel7-3p	CCR4-NOT transcription complex subunit 4	CNOT4
mun-novel7-3p	collagen alpha-1(IV) chain	COL4A1
mun-novel7-3p	COP9 signalosome complex subunit 4	COPS4
mun-novel7-3p	copine-2	CPNE2
mun-novel7-3p	cleavage and polyadenylation specificity factor subunit 4	CPSF4
mun-novel7-3p	casein kinase I isoform gamma-1	CSNK1G1
mun-novel7-3p	cathepsin D	CTSD
mun-novel7-3p	cortactin-binding protein 2	CTTNBP2
mun-novel7-3p	cytohesin-4	CYTH4
mun-novel7-3p	DDB1- and CUL4-associated factor 17	DCAF17
mun-novel7-3p	probable ATP-dependent RNA helicase DDX31	DDX31
mun-novel7-3p	ATP-dependent RNA helicase DDX3X	DDX3X
mun-novel7-3p	probable ATP-dependent RNA helicase DDX41	DDX41
mun-novel7-3p	density-regulated protein	DENR
mun-novel7-3p	dolichol phosphate-mannose biosynthesis regulatory protein	DPM2
mun-novel7-3p	dipeptidyl peptidase 8	DPP8
mun-novel7-3p	dihydropyrimidinase-related protein 2	DPYSL2
mun-novel7-3p	protein Dr1	DR1
mun-novel7-3p	dual specificity protein phosphatase 6	DUSP6
mun-novel7-3p	cytoplasmic dynein 1 light intermediate chain 1	DYNC1LI1
mun-novel7-3p	EGF-like repeat and discoidin I-like domain-containing protein 3	EDIL3
mun-novel7-3p	eukaryotic translation initiation factor 4H	EIF4H
mun-novel7-3p	ELMO domain-containing protein 2	ELMOD2
mun-novel7-3p	elongation of very long chain fatty acids protein 1	ELOVL1
mun-novel7-3p	ephrin type-A receptor 5	EPHA5
mun-novel7-3p	ephrin type-B receptor 1	EPHB1
mun-novel7-3p	exostosin-1	EXT1
mun-novel7-3p	protein FAM19A2	FAM19A2
mun-novel7-3p	glycosaminoglycan xylosylkinase	FAM20B
mun-novel7-3p	phenylalanine--tRNA ligase beta subunit	FARSB
mun-novel7-3p	fibulin-5	FBLN5
mun-novel7-3p	protein fem-1 C	FEM1C
mun-novel7-3p	filensin	FIGN
mun-novel7-3p	peptidyl-prolyl cis-trans isomerase FKBP4	FKBP4
mun-novel7-3p	fragile X mental retardation protein 1 B	FMR1
mun-novel7-3p	forkhead box protein P2	FOXP2
mun-novel7-3p	gamma-aminobutyric acid receptor subunit gamma-2	GABRG2
mun-novel7-3p	polypeptide N-acetylgalactosaminyltransferase 1	GALNT1
mun-novel7-3p	rab GDP dissociation inhibitor beta	GDI2
mun-novel7-3p	gamma-glutamylcyclotransferase	GGCT
mun-novel7-3p	glucocorticoid-induced transcript 1 protein	GLCCI1
mun-novel7-3p	glia maturation factor beta	GMFB
mun-novel7-3p	grpE protein 1, mitochondrial	GRPEL1
mun-novel7-3p	glycogenin-1	GYG1
mun-novel7-3p	histidine--tRNA ligase, cytoplasmic	HARS
mun-novel7-3p	histone deacetylase 8	HDAC8
mun-novel7-3p	probable E3 ubiquitin-protein ligase HERC4	HERC4
mun-novel7-3p	hypoxia-inducible factor 1-alpha inhibitor	HIF1AN
mun-novel7-3p	heterogeneous nuclear ribonucleoprotein A0	HNRNPA0
mun-novel7-3p	heterogeneous nuclear ribonucleoprotein K	HNRNPK
mun-novel7-3p	homologous-pairing protein 2	HOP2
mun-novel7-3p	DNA-binding protein inhibitor ID-4	ID4
mun-novel7-3p	intermediate filament family orphan 1	IFFO1
mun-novel7-3p	insulin-like growth factor-binding protein 5	IGFBP5
mun-novel7-3p	DNA helicase INO80	INO80
mun-novel7-3p	phosphatidylinositol 4,5-bisphosphate 5-phosphatase A	INPP5J
mun-novel7-3p	iron-sulfur cluster assembly enzyme ISCU, mitochondrial	ISCU
mun-novel7-3p	bifunctional arginine demethylase and lysyl-hydroxylase JMJD6	JMJD6
mun-novel7-3p	potassium channel subfamily K member 2	KCNK2
mun-novel7-3p	potassium voltage-gated channel subfamily C member 1	KCNQ1
mun-novel7-3p	BTB/POZ domain-containing protein KCTD7	KCTD7
mun-novel7-3p	lysine-specific demethylase 7	KDM7
mun-novel7-3p	KIAA0930	KIAA0930
mun-novel7-3p	UPF0606 protein KIAA1549	KIAA1549
mun-novel7-3p	kinesin-like protein KIF3B	KIF3B
mun-novel7-3p	kelch-like protein 13	KLHL13
mun-novel7-3p	kinetochore-associated protein 1	KNTC1
mun-novel7-3p	ragulator complex protein LAMTOR3	LAMTOR3
mun-novel7-3p	la-related protein 4B	LARP4B
mun-novel7-3p	probable leucine--tRNA ligase, mitochondrial	LARS2
mun-novel7-3p	ligand of Numb protein X 2	LNX2
mun-novel7-3p	leucine-rich repeat and transmembrane domain-containing protein 2	LRIT2
mun-novel7-3p	leucine-rich repeat transmembrane neuronal protein 1	LRRTM1
mun-novel7-3p	leucine zipper transcription factor-like protein 1	LZTFL1
mun-novel7-3p	microtubule-associated protein RP/EB family member 2	MAPRE2
mun-novel7-3p	membrane-bound transcription factor site-1 protease	MBTPS1
mun-novel7-3p	mitochondrial calcium uniporter regulator 1	MCUR1
mun-novel7-3p	MAM domain-containing glycosylphosphatidylinositol anchor protein 1	MDGA1
mun-novel7-3p	mediator of RNA polymerase II transcription subunit 31	MED31
mun-novel7-3p	MICAL-like protein 1	MICALL1
mun-novel7-3p	malectin	MLEC
mun-novel7-3p	matrix metalloproteinase-16	MMP16
mun-novel7-3p	max-binding protein MNT	MNT
mun-novel7-3p	55 kDa erythrocyte membrane protein	MPP1
mun-novel7-3p	ribosomal protein 63, mitochondrial	MRPL63
mun-novel7-3p	myotubularin-related protein 2	MTMR2
mun-novel7-3p	max-interacting protein 1	MXI1
mun-novel7-3p	transcriptional activator Myb	MYB
mun-novel7-3p	unconventional myosin-VI	MYO6
mun-novel7-3p	nuclear prelamin A recognition factor	NARF
mun-novel7-3p	serine/threonine-protein kinase Nek9	NEK9
mun-novel7-3p	nuclear factor 1 A-type	NFIA
mun-novel7-3p	nuclear transcription factor Y subunit alpha	NFYA
mun-novel7-3p	putative ribosomal RNA methyltransferase NOP2	NOP2
mun-novel7-3p	vesicle-fusing ATPase	NSF
mun-novel7-3p	neurotrophin-3	NTF3
mun-novel7-3p	netrin-G1	NTNG1
mun-novel7-3p	nuclear migration protein nudC	NUDC
mun-novel7-3p	outer dense fiber protein 2	ODF2
mun-novel7-3p	PAB-dependent poly(A)-specific ribonuclease subunit 3	PAN3
mun-novel7-3p	high affinity cAMP-specific 3',5'-cyclic phosphodiesterase 7A	PDE7A
mun-novel7-3p	E3 ubiquitin-protein ligase pellino 2	PELI2
mun-novel7-3p	PERQ amino acid-rich with GYF domain-containing protein 2	PERQ2
mun-novel7-3p	phosphoglycerate mutase 1	PGAM1
mun-novel7-3p	membrane-associated progesterone receptor component 2	PGRMC2
mun-novel7-3p	phosphatase and actin regulator 3	PHACTR3
mun-novel7-3p	phosphatidylinositol N-acetylglucosaminyltransferase subunit C	PIGC
mun-novel7-3p	PITH domain-containing protein 1	PITHD1
mun-novel7-3p	phosphatidylinositol transfer protein beta isoform	PITPNB
mun-novel7-3p	pleckstriny domain-containing family A member 5	PLEKHA5
mun-novel7-3p	pleckstriny domain-containing family F member 2	PLEKHF2
mun-novel7-3p	procollagen-lysine,2-oxoglutarate 5-dioxygenase 1	PLOD1
mun-novel7-3p	periplakin	PPL
mun-novel7-3p	periodic tryptophan protein 1	PWP1
mun-novel7-3p	R3H domain-containing protein 2	R3HDM2
mun-novel7-3p	ras-related protein Rab-12	RAB12
mun-novel7-3p	ras-related protein Rab-21	RAB21
mun-novel7-3p	ral GTPase-activating protein subunit alpha-1	RALGAPA1
mun-novel7-3p	ras-related protein Rap-2c	RAP2C
mun-novel7-3p	rap guanine nucleotide exchange factor 2	RAPGEF2
mun-novel7-3p	oligoribonuclease, mitochondrial	REXO2
mun-novel7-3p	regulator of G-protein signaling 5	RGS5
mun-novel7-3p	regulator of G-protein signaling 7	RGS7
mun-novel7-3p	transforming protein RhoA	RHOA
mun-novel7-3p	rho-related GTP-binding protein RhoC	RHOC
mun-novel7-3p	E3 ubiquitin-protein ligase RNF185	RNF185
mun-novel7-3p	60S ribosomal protein L37a	RPL37A
mun-novel7-3p	60S ribosomal protein L39	RPL39
mun-novel7-3p	ribonuclease P protein subunit p38	RPP38
mun-novel7-3p	ribonucleoside-diphosphate reductase subunit M2 B	RRM2B
mun-novel7-3p	neuroendocrine protein 7B2	SCG5
mun-novel7-3p	schwannomin-interacting protein 1	SCHIP1
mun-novel7-3p	serologically defined colon cancer antigen 8	SDCCAG8
mun-novel7-3p	succinate dehydrogenase [ubiquinone] cytochrome b small subunit, mitochondrial	SDHD
mun-novel7-3p	small EDRK-rich factor 1	SERF1A
mun-novel7-3p	SH3 domain-binding glutamic acid-rich-like protein 3	SH3BGRL3
mun-novel7-3p	leucine-rich repeat protein SHOC-2	SHOC2
mun-novel7-3p	protein Shroom3	SHROOM3
mun-novel7-3p	S-phase kinase-associated protein 1	SKP1
mun-novel7-3p	excitatory amino acid transporter 1	SLC1A3
mun-novel7-3p	sodium/potassium/calcium exchanger 1	SLC24A1
mun-novel7-3p	mitoferrin-2	SLC25A28
mun-novel7-3p	prestin	SLC26A5
mun-novel7-3p	zinc transporter ZIP13	SLC39A13
mun-novel7-3p	large neutral amino acids transporter small subunit 4	SLC43A2
mun-novel7-3p	stromal membrane-associated protein 2	SMAP2
mun-novel7-3p	serine/threonine-protein kinase SMG1	SMG1
mun-novel7-3p	small integral membrane protein 13	SMIM13
mun-novel7-3p	small integral membrane protein 4	SMIM4
mun-novel7-3p	beta-synuclein	SNCB
mun-novel7-3p	sorting nexin-33	SNX33
mun-novel7-3p	sorting nexin-7	SNX7
mun-novel7-3p	sprouty-related, EVH1 domain-containing protein 2	SPRED2
mun-novel7-3p	transcription elongation factor SPT4	SPT4
mun-novel7-3p	serum response factor	SRF
mun-novel7-3p	spermidine synthase	SRM
mun-novel7-3p	stathmin-4	STMN4
mun-novel7-3p	serine/threonine/tyrosine-interacting protein	STYX
mun-novel7-3p	small ubiquitin-related modifier 2	SUMO2
mun-novel7-3p	transcription initiation factor TFIID subunit 2	TAF2
mun-novel7-3p	TAR DNA-binding protein 43	TARDBP
mun-novel7-3p	angiopoietin-1 receptor	TEK
mun-novel7-3p	tight junction protein ZO-1	TJP1
mun-novel7-3p	tolloid-like protein 2	TLL2
mun-novel7-3p	transmembrane protein 175	TMEM175
mun-novel7-3p	transmembrane protein 206	TMEM206
mun-novel7-3p	transmembrane protein 229B	TMEM229B
mun-novel7-3p	thymosin beta-4	TMSB4
mun-novel7-3p	tumor necrosis factor receptor superfamily member 21	TNFRSF21
mun-novel7-3p	transportin-1	TNPO1
mun-novel7-3p	torsin-1A	TOR1A
mun-novel7-3p	trafficking protein particle complex subunit 11	TRAPPC11
mun-novel7-3p	tumor susceptibility gene 101 protein	TSG101
mun-novel7-3p	tetratricopeptide repeat protein 17	TTC17
mun-novel7-3p	thioredoxin, mitochondrial	TXN2
mun-novel7-3p	thioredoxin domain-containing protein 12	TXNDC12
mun-novel7-3p	ubiquitin carboxyl-terminal hydrolase 14	USP14
mun-novel7-3p	ubiquitin carboxyl-terminal hydrolase 15	USP15
mun-novel7-3p	guanine nucleotide exchange factor VAV3	VAV3
mun-novel7-3p	protein VPRBP	VPRBP
mun-novel7-3p	WD repeat and SOCS box-containing protein 2	WSB2
mun-novel7-3p	WSC domain-containing protein 2	WSCD2
mun-novel7-3p	zinc finger SWIM domain-containing protein 8	ZSWIM8
mun-novel72-3p	abhydrolase domain-containing protein 2	ABHD2
mun-novel72-3p	abl interactor 1	ABI1
mun-novel72-3p	abl interactor 1	ABI1
mun-novel72-3p	alkaline ceramidase 2	ACER2
mun-novel72-3p	acyl-coenzyme A thioesterase 13	ACOT13
mun-novel72-3p	axin interactor, dorsalization-associated protein	AIDA
mun-novel72-3p	adenylate kinase 8	AK8
mun-novel72-3p	retinal dehydrogenase 2	ALDH1A2
mun-novel72-3p	anaphase-promoting complex subunit 4	ANAPC4
mun-novel72-3p	AP-1 complex subunit gamma-1	AP1G1
mun-novel72-3p	AP-1 complex subunit mu-1	AP1M1
mun-novel72-3p	AP-1 complex subunit sigma-2	AP1S2
mun-novel72-3p	apoptosis inhibitor 5	API5
mun-novel72-3p	NAD(P)H-hydrate epimerase	APOA1BP
mun-novel72-3p	PRA1 family protein 3	ARL6IP5
mun-novel72-3p	actin-related protein 3B	ARP3B
mun-novel72-3p	V-type proton ATPase subunit G 1	ATP6V1G1
mun-novel72-3p	late secretory pathway protein AVL9	AVL9
mun-novel72-3p	beta-1,3-galactosyltransferase 1	B3GALT1
mun-novel72-3p	UDP-GlcNAc:betaGal beta-1,3-N-acetylglucosaminyltransferase 7	B3GNT7
mun-novel72-3p	BAG family molecular chaperone regulator 3	BAG3
mun-novel72-3p	brain-specific angiogenesis inhibitor 1-associated protein 2	BAIAP2
mun-novel72-3p	B-cell CLL/lymphoma 9 protein	BCL9
mun-novel72-3p	betaine--homocysteine S-methyltransferase 1	BHMT
mun-novel72-3p	bone morphogenetic protein 2	BMP2
mun-novel72-3p	bone morphogenetic protein 3B	BMP3B
mun-novel72-3p	serine/threonine-protein kinase BRSK2	BRSK2
mun-novel72-3p	TATA-binding protein-associated factor 172	BTAF1
mun-novel72-3p	biotinidase	BTD
mun-novel72-3p	UPF0587 protein C1orf123	C1orf123
mun-novel72-3p	voltage-dependent L-type calcium channel subunit beta-2	CACNB2
mun-novel72-3p	protein CASC4	CASC4
mun-novel72-3p	CAS1 domain-containing protein 1	CASD1
mun-novel72-3p	coiled-coil domain-containing protein 80	CCDC80
mun-novel72-3p	coiled-coil domain-containing protein 93	CCDC93
mun-novel72-3p	T-complex protein 1 subunit delta	CCT4
mun-novel72-3p	sialomucin core protein 24	CD164
mun-novel72-3p	cadherin-related family member 1	CDHR1
mun-novel72-3p	chromodomain-helicase-DNA-binding protein 7	CHD7
mun-novel72-3p	choline kinase alpha	CHKA
mun-novel72-3p	charged multivesicular body protein 2b	CHMP2B
mun-novel72-3p	N-chimaerin	CHN1
mun-novel72-3p	carbohydrate sulfotransferase 10	CHST10
mun-novel72-3p	carbohydrate sulfotransferase 9	CHST9
mun-novel72-3p	UPF0444 transmembrane protein C12orf23	CL023
mun-novel72-3p	CLIP-associating protein 2	CLASP2
mun-novel72-3p	calmin	CLMN
mun-novel72-3p	CCR4-NOT transcription complex subunit 7	CNOT7
mun-novel72-3p	cannabinoid receptor 1	CNR1
mun-novel72-3p	cyclic AMP-responsive element-binding protein 1	CREB1
mun-novel72-3p	corticotropin-releasing factor receptor 2	CRHR2
mun-novel72-3p	beta-catenin-interacting protein 1	CTNNBIP1
mun-novel72-3p	cullin-3	CUL3
mun-novel72-3p	probable ATP-dependent RNA helicase DHX35	DHX35
mun-novel72-3p	disks large-associated protein 2	DLGAP2
mun-novel72-3p	dual specificity protein phosphatase 6	DUSP6
mun-novel72-3p	receptor-binding cancer antigen expressed on SiSo cells	EBAG9
mun-novel72-3p	EH domain-containing protein 3	EHD3
mun-novel72-3p	eukaryotic translation initiation factor 3 subunit A	EIF2SA
mun-novel72-3p	ephrin type-A receptor 5	EPHA5
mun-novel72-3p	ERBB receptor feedback inhibitor 1	ERRFI1
mun-novel72-3p	estrogen-related receptor gamma	ESRRG
mun-novel72-3p	eukaryotic peptide chain release factor subunit 1	ETF1
mun-novel72-3p	exocyst complex component 1	EXOC1
mun-novel72-3p	histone-lysine N-methyltransferase EZH2	EZH2
mun-novel72-3p	FAS-associated factor 1	FAF1
mun-novel72-3p	protein FAM207A	FAM207A
mun-novel72-3p	F-box/SPRY domain-containing protein 1	FBXO45
mun-novel72-3p	F-box/WD repeat-containing protein 11	FBXW11
mun-novel72-3p	protein fem-1 A	FEM1A
mun-novel72-3p	peptidyl-prolyl cis-trans isomerase FKBP4	FKBP4
mun-novel72-3p	polypeptide N-acetylgalactosaminyltransferase-like 6	GALNTL6
mun-novel72-3p	transcription factor GATA-4	GATA4
mun-novel72-3p	gametogenetin-binding protein 2	GGNBP2
mun-novel72-3p	gap junction beta-1 protein	GJB1
mun-novel72-3p	G kinase-anchoring protein 1	GKAP1
mun-novel72-3p	glucocorticoid-induced transcript 1 protein	GLCCI1
mun-novel72-3p	glutamate dehydrogenase 1, mitochondrial	GLUD1
mun-novel72-3p	aspartate aminotransferase, cytoplasmic	GOT1
mun-novel72-3p	protein GPR107	GPR107
mun-novel72-3p	probable G-protein coupled receptor 34	GPR34
mun-novel72-3p	growth factor receptor-bound protein 2	GRB2
mun-novel72-3p	gremlin-1	GREM1
mun-novel72-3p	glutathione S-transferase omega-1	GSTO1
mun-novel72-3p	hypoxia-inducible factor 1-alpha inhibitor	HIF1AN
mun-novel72-3p	high mobility group protein B1	HMGB1
mun-novel72-3p	hematological and neurological expressed 1 protein	HN1
mun-novel72-3p	heterogeneous nuclear ribonucleoproteins A2/B1	HNRNPA2B1
mun-novel72-3p	heterogeneous nuclear ribonucleoprotein H	HNRNPH1
mun-novel72-3p	protein Hook 1	HOOK1
mun-novel72-3p	protein Hook 3	HOOK3
mun-novel72-3p	heparan sulfate glucosamine 3-O-sulfotransferase 5	HS3ST5
mun-novel72-3p	HIV Tat-specific factor 1	HTATSF1
mun-novel72-3p	type I inositol 1,4,5-trisphosphate 5-phosphatase	INPP5A
mun-novel72-3p	iron-sulfur cluster assembly 1, mitochondrial	ISU1
mun-novel72-3p	integrin beta-5	ITGB5
mun-novel72-3p	histone acetyltransferase KAT7	KAT7
mun-novel72-3p	kelch repeat and BTB domain-containing protein 2	KBTBD2
mun-novel72-3p	voltage-gated potassium channel subunit beta-1	KCNAB1
mun-novel72-3p	KIAA0247	KIAA0247
mun-novel72-3p	kinesin-like protein KIF26A	KIF26A
mun-novel72-3p	kit ligand	KITLG
mun-novel72-3p	importin subunit alpha-4	KPNA3
mun-novel72-3p	lanC-like protein 2	LANCL2
mun-novel72-3p	serine/threonine-protein kinase LATS2	LATS2
mun-novel72-3p	LIM/homeobox protein Lhx9	LHX9
mun-novel72-3p	protein lin-7 A	LIN7A
mun-novel72-3p	leucine-rich repeat and immunoglobulin-like domain-containing nogo receptor-interacting protein 1	LINGO1
mun-novel72-3p	phosphatidate phosphatase LPIN2	LPIN2
mun-novel72-3p	leucine-rich PPR motif-containing protein, mitochondrial	LRPPRC
mun-novel72-3p	leucine-rich repeat transmembrane neuronal protein 1	LRRTM1
mun-novel72-3p	U6 snRNA-associated Sm-like protein LSm5	LSM5
mun-novel72-3p	lysM and putative peptidoglycan-binding domain-containing protein 2	LYSMD2
mun-novel72-3p	mastermind-like protein 1	MAML1
mun-novel72-3p	mitogen-activated protein kinase 14	MAPK14
mun-novel72-3p	target of rapamycin complex 2 subunit MAPKAP1	MAPKAP1
mun-novel72-3p	MAM domain-containing glycosylphosphatidylinositol anchor protein 2	MDGA2
mun-novel72-3p	mediator of RNA polymerase II transcription subunit 8	MED8
mun-novel72-3p	microfibrillar-associated protein 5	MFAP5
mun-novel72-3p	mirror-image polydactyly gene 1 protein	MIPOL1
mun-novel72-3p	E3 ubiquitin-protein ligase makorin-1	MKRN1
mun-novel72-3p	myelin expression factor 2	MYEF2
mun-novel72-3p	nucleosome assembly protein 1-like 4	NAP1L4
mun-novel72-3p	neuron navigator 3	NAV3
mun-novel72-3p	cytoplasmic protein NCK2	NCK2
mun-novel72-3p	serine/threonine-protein kinase Nek9	NEK9
mun-novel72-3p	protein NEL-like	NELL1
mun-novel72-3p	nuclear receptor subfamily 0 group B member 1	NR0B1
mun-novel72-3p	nuclear receptor-binding factor 2	NRBF2
mun-novel72-3p	noelin-3	OLFM3
mun-novel72-3p	oxidative stress-induced growth inhibitor 1	OSGIN1
mun-novel72-3p	oligosaccharyltransferase complex subunit OSTC	OSTC
mun-novel72-3p	protein disulfide-isomerase A6	PDIA6
mun-novel72-3p	xaa-Pro dipeptidase	PEPD
mun-novel72-3p	prefoldin subunit 3	PFDN3
mun-novel72-3p	PHD finger protein 20	PHF20
mun-novel72-3p	phosphatidylinositol 3-kinase regulatory subunit gamma	PIK3R3
mun-novel72-3p	DNA-directed RNA polymerase III subunit RPC6	POLR3F
mun-novel72-3p	protein phosphatase 1 regulatory inhibitor subunit 16B	PPP1R16B
mun-novel72-3p	serine/threonine-protein phosphatase 4 regulatory subunit 2	PPP4R2
mun-novel72-3p	prostaglandin E synthase 3-like	PTGES3L
mun-novel72-3p	receptor-type tyrosine-protein phosphatase F	PTPRF
mun-novel72-3p	receptor-type tyrosine-protein phosphatase kappa	PTPRK
mun-novel72-3p	receptor-type tyrosine-protein phosphatase S	PTPRS
mun-novel72-3p	glutamine-rich protein 1	QRICH1
mun-novel72-3p	ras-related protein Rab-18	RAB18
mun-novel72-3p	ras-related protein Rab-39A	RAB39A
mun-novel72-3p	ras-related protein Rap-2c	RAP2C
mun-novel72-3p	reticulocalbin-2	RCN2
mun-novel72-3p	retinol dehydrogenase 12	RDH12
mun-novel72-3p	regulator of G-protein signaling 10	RGS10
mun-novel72-3p	rho-related BTB domain-containing protein 1	RHOBTB1
mun-novel72-3p	E3 ubiquitin-protein ligase RING2	RING2
mun-novel72-3p	E3 ubiquitin-protein ligase RNF185	RNF185
mun-novel72-3p	E3 ubiquitin-protein ligase RNF19A	RNF19A
mun-novel72-3p	tyrosine-protein kinase transmembrane receptor ROR1	ROR1
mun-novel72-3p	replication protein A 70 kDa DNA-binding subunit	RPA1
mun-novel72-3p	ras-related protein R-Ras2	RRAS2
mun-novel72-3p	ribosomal RNA-processing protein 7 A	RRP7A
mun-novel72-3p	tyrosine-protein kinase RYK	RYK
mun-novel72-3p	sodium channel protein type 2 subunit alpha	SCN2A
mun-novel72-3p	secernin-1	SCRN1
mun-novel72-3p	syndecan-1	SDC1
mun-novel72-3p	histone-lysine N-methyltransferase setd3	SETD3
mun-novel72-3p	SH3 domain-binding glutamic acid-rich-like protein 3	SH3BGRL3
mun-novel72-3p	endophilin-B2	SH3GLB2
mun-novel72-3p	solute carrier family 13 member 5	SLC13A5
mun-novel72-3p	sodium/potassium/calcium exchanger 4	SLC24A4
mun-novel72-3p	pre-mRNA-splicing factor SLU7	SLU7
mun-novel72-3p	serine/threonine-protein kinase SMG1	SMG1
mun-novel72-3p	N-lysine methyltransferase SMYD2	SMYD2
mun-novel72-3p	SNF-related serine/threonine-protein kinase	SNRK
mun-novel72-3p	sorting nexin-16	SNX16
mun-novel72-3p	sorting nexin-4	SNX4
mun-novel72-3p	suppressor of cytokine signaling 6	SOCS6
mun-novel72-3p	signal peptide peptidase-like 3	SPPL3
mun-novel72-3p	serine palmitoyltransferase 2	SPTLC2
mun-novel72-3p	sperm-specific antigen 2	SSFA2
mun-novel72-3p	cohesin subunit SA-2	STAG2
mun-novel72-3p	supervillin	SVIL
mun-novel72-3p	transcription initiation factor TFIID subunit 11	TAF11
mun-novel72-3p	TBC1 domain family member 13	TBC1D13
mun-novel72-3p	transcription factor Dp-1	TFDP1
mun-novel72-3p	thyroid hormone receptor-associated protein 3	THRAP3
mun-novel72-3p	T-lymphoma invasion and metastasis-inducing protein 1	TIAM1
mun-novel72-3p	mitochondrial import inner membrane translocase subunit Tim22	TIMM22
mun-novel72-3p	transmembrane and coiled-coil domains protein 2	TMCC2
mun-novel72-3p	transmembrane protein 165	TMEM165
mun-novel72-3p	transmembrane protein 196	TMEM196
mun-novel72-3p	transmembrane protein 47	TMEM47
mun-novel72-3p	transmembrane protein 50B	TMEM50B
mun-novel72-3p	mitochondrial inner membrane protein	TMEM65
mun-novel72-3p	transmembrane protein 65	TMEM65
mun-novel72-3p	mitochondrial import receptor subunit TOM6	TOM6
mun-novel72-3p	tripeptidyl-peptidase 2	TPP2
mun-novel72-3p	thiosulfate sulfurtransferase/rhodanese-like domain-containing protein 3	TSTD3
mun-novel72-3p	tetratricopeptide repeat protein 21B	TTC21B
mun-novel72-3p	Golgi apparatus membrane protein TVP23 B	TVP23B
mun-novel72-3p	ubiquitin-conjugating enzyme E2 G1	UBE2G1
mun-novel72-3p	ubiquitin-conjugating enzyme E2 H	UBE2H
mun-novel72-3p	ubiquitin-conjugating enzyme E2 K	UBE2K
mun-novel72-3p	ubiquilin-1	UBQLN1
mun-novel72-3p	UBX domain-containing protein 4	UBXN4
mun-novel72-3p	uroporphyrinogen-III synthase	UROS
mun-novel72-3p	ubiquitin carboxyl-terminal hydrolase 25	USP25
mun-novel72-3p	ubiquitin carboxyl-terminal hydrolase 32	USP32
mun-novel72-3p	ubiquitin carboxyl-terminal hydrolase 47	USP47
mun-novel72-3p	vacuole membrane protein 1	VMP1
mun-novel72-3p	vacuolar protein sorting-associated protein 35	VPS35
mun-novel72-3p	V-set and transmembrane domain-containing protein 2A	VSTM2A
mun-novel72-3p	neural Wiskott-Aldrich syndrome protein	WASL
mun-novel72-3p	uncharacterized methyltransferase WBSCR22	WBSCR22
mun-novel72-3p	WD repeat-containing protein 20	WDR20
mun-novel72-3p	tRNA (guanine-N(7)-)-methyltransferase subunit WDR4	WDR4
mun-novel72-3p	methylosome protein 50	WDR77
mun-novel72-3p	WD repeat and SOCS box-containing protein 1	WSB1
mun-novel72-3p	zinc finger BED domain-containing protein 4	ZBED4
mun-novel72-3p	zinc finger and BTB domain-containing protein 10	ZBTB10
mun-novel72-3p	zinc finger and BTB domain-containing protein 26	ZBTB26
mun-novel72-3p	zinc finger SWIM domain-containing protein 6	ZSWIM6
mun-novel72-5p	alanine--tRNA ligase, mitochondrial	AARS2
mun-novel72-5p	active breakpoint cluster region-related protein	ABR
mun-novel72-5p	long-chain-fatty-acid--CoA ligase ACSBG1	ACSBG1
mun-novel72-5p	glycogen debranching enzyme	AGL
mun-novel72-5p	A-kinase anchor protein 9	AKAP9
mun-novel72-5p	retinal dehydrogenase 2	ALDH1A2
mun-novel72-5p	anaphase-promoting complex subunit 2	ANAPC2
mun-novel72-5p	aquaporin-4	AQP4
mun-novel72-5p	apoptosis-resistant E3 ubiquitin protein ligase 1	AREL1
mun-novel72-5p	actin-related protein 2	ARP2
mun-novel72-5p	atlastin-2	ATL2
mun-novel72-5p	ATP synthase mitochondrial F1 complex assembly factor 2	ATPAF2
mun-novel72-5p	C3a anaphylatoxin chemotactic receptor	C3AR1
mun-novel72-5p	protein CBFA2T1	CBFA2T1
mun-novel72-5p	E3 ubiquitin-protein ligase CBL	CBL
mun-novel72-5p	G1/S-specific cyclin-D2	CCND2
mun-novel72-5p	choline kinase alpha	CHKA
mun-novel72-5p	muscarinic acetylcholine receptor M2	CHRM2
mun-novel72-5p	COP9 signalosome complex subunit 7a	COPS7A
mun-novel72-5p	cytotoxic T-lymphocyte protein 4	CTLA4
mun-novel72-5p	dynactin subunit 3	DCTN3
mun-novel72-5p	disco-interacting protein 2 A	DIP2A
mun-novel72-5p	dnaJ subfamily C member 8	DNAJC8
mun-novel72-5p	probable E3 ubiquitin-protein ligase DTX2	DTX2
mun-novel72-5p	cytoplasmic dynein 1 light intermediate chain 2	DYNC1LI2
mun-novel72-5p	dynein light chain 2, cytoplasmic	DYNLL2
mun-novel72-5p	ELAV-like protein 4	ELAVL2
mun-novel72-5p	elongation of very long chain fatty acids protein 1	ELOVL1
mun-novel72-5p	protein FAM131B	FAM131B
mun-novel72-5p	membrane protein FAM159A	FAM159A
mun-novel72-5p	fibulin-5	FBLN5
mun-novel72-5p	F-box/LRR-repeat protein 14	FBXL14
mun-novel72-5p	protein fem-1 A	FEM1A
mun-novel72-5p	fibroblast growth factor 9	FGF9
mun-novel72-5p	FH1/FH2 domain-containing protein 1	FHOD1
mun-novel72-5p	fos-related antigen 2	FOSL2
mun-novel72-5p	GATS-like protein 1	GATSL1
mun-novel72-5p	gap junction beta-7 protein	GJB7
mun-novel72-5p	guanine nucleotide-binding protein G(z) subunit alpha	GNAZ
mun-novel72-5p	gephyrin	GPHN
mun-novel72-5p	hepatocyte nuclear factor 1-alpha	HNF1A
mun-novel72-5p	heterogeneous nuclear ribonucleoprotein A0	HNRNPA0
mun-novel72-5p	hippocalcin-like protein 1	HPCAL1
mun-novel72-5p	immunoglobulin superfamily member 21	IGSF21
mun-novel72-5p	inhibitor of growth protein 4	ING4
mun-novel72-5p	DNA helicase INO80	INO80
mun-novel72-5p	integrin alpha-8	ITGA8
mun-novel72-5p	integrin alpha-V	ITGAV
mun-novel72-5p	janus kinase and microtubule-interacting protein 2	JAKMIP1
mun-novel72-5p	histone acetyltransferase KAT7	KAT7
mun-novel72-5p	kinesin-like protein KIF3B	KIF3B
mun-novel72-5p	rhombotin-2	LMO2
mun-novel72-5p	E3 ubiquitin-protein ligase LNX	LNX
mun-novel72-5p	lysophospholipid acyltransferase 5	LPCAT3
mun-novel72-5p	mitotic spindle assembly checkpoint protein MAD2B	MAD2L2
mun-novel72-5p	mastermind-like protein 1	MAML1
mun-novel72-5p	mitogen-activated protein kinase kinase kinase 2	MAP3K2
mun-novel72-5p	mitogen-activated protein kinase kinase kinase 3	MAP3K3
mun-novel72-5p	c-Jun-amino-terminal kinase-interacting protein 3	MAPK8IP3
mun-novel72-5p	mannan-binding lectin serine protease 1	MASP1
mun-novel72-5p	monocarboxylate transporter 4	MCT4
mun-novel72-5p	chromatin modification-related protein MEAF6	MEAF6
mun-novel72-5p	homeobox protein MOX-2	MEOX2
mun-novel72-5p	E3 ubiquitin-protein ligase MIB2	MIB2
mun-novel72-5p	malectin	MLEC
mun-novel72-5p	myeloid leukemia factor 2	MLF2
mun-novel72-5p	MAGUK p55 subfamily member 6	MPP6
mun-novel72-5p	N(6)-adenine-specific DNA methyltransferase 2	N6AMT2
mun-novel72-5p	serine/threonine-protein kinase Nek9	NEK9
mun-novel72-5p	nuclear factor NF-kappa-B p105 subunit	NFKB1
mun-novel72-5p	H/ACA ribonucleoprotein complex subunit 2	NHP2
mun-novel72-5p	nucleotide-binding oligomerization domain-containing protein 1	NOD1
mun-novel72-5p	non-POU domain-containing octamer-binding protein	NONO
mun-novel72-5p	bile acid receptor	NR1H4
mun-novel72-5p	nuclear receptor subfamily 2 group E member 1	NR2E1
mun-novel72-5p	nuclear receptor subfamily 4 group A member 3	NR4A3
mun-novel72-5p	NT-3 growth factor receptor	NTRK3
mun-novel72-5p	nuclear migration protein nudC	NUDC
mun-novel72-5p	neurexophilin-1	NXPH1
mun-novel72-5p	oxysterol-binding protein-related protein 2	OSBPL2
mun-novel72-5p	pappalysin-1	PAPPA
mun-novel72-5p	paired box protein Pax-7	PAX7
mun-novel72-5p	platelet-derived growth factor C	PDGFC
mun-novel72-5p	protein disulfide-isomerase A3	PDIA3
mun-novel72-5p	prefoldin subunit 1	PFDN1
mun-novel72-5p	CDP-diacylglycerol--glycerol-3-phosphate 3-phosphatidyltransferase, mitochondrial	PGS1
mun-novel72-5p	phosphorylase b kinase regulatory subunit alpha, liver isoform	PHKA2
mun-novel72-5p	GPI transamidase component PIG-T	PIGT
mun-novel72-5p	plasmolipin	PLLP
mun-novel72-5p	PQ-loop repeat-containing protein 1	PQLC1
mun-novel72-5p	cAMP-dependent protein kinase type I-beta regulatory subunit	PRKAR1B
mun-novel72-5p	protein kinase C beta type	PRKCB
mun-novel72-5p	protein kinase C eta type	PRKCH
mun-novel72-5p	ribose-phosphate pyrophosphokinase 1	PRPS1
mun-novel72-5p	serine/threonine-protein phosphatase 2A activator	PTPA
mun-novel72-5p	tyrosine-protein phosphatase non-receptor type 1	PTPN1
mun-novel72-5p	receptor-type tyrosine-protein phosphatase F	PTPRF
mun-novel72-5p	putative peptidyl-tRNA hydrolase PTRHD1	PTRHD1
mun-novel72-5p	ras-related C3 botulinum toxin substrate 3	RAC3
mun-novel72-5p	RAF proto-oncogene serine/threonine-protein kinase	RAF1
mun-novel72-5p	probable RNA-binding protein 18	RBM18
mun-novel72-5p	DNA-binding protein RFXANK	RFXANK
mun-novel72-5p	rho-related BTB domain-containing protein 1	RHOBTB1
mun-novel72-5p	RING finger protein 126	RNF126
mun-novel72-5p	ras-responsive element-binding protein 1	RREB1
mun-novel72-5p	probable ribosome biogenesis protein RLP24	RSL24D1
mun-novel72-5p	tyrosine-protein kinase RYK	RYK
mun-novel72-5p	protein S100-A1	S100A1
mun-novel72-5p	signal peptide, CUB and EGF-like domain-containing protein 2	SCUBE2
mun-novel72-5p	long-chain fatty acid transport protein 4	SLC27A4
mun-novel72-5p	adenosine 3'-phospho 5'-phosphosulfate transporter 2	SLC35B3
mun-novel72-5p	solute carrier family 35 member E1	SLC35E1
mun-novel72-5p	large neutral amino acids transporter small subunit 4	SLC43A2
mun-novel72-5p	transcription elongation factor SPT4	SPT4
mun-novel72-5p	stathmin-4	STMN4
mun-novel72-5p	synaptotagmin-1	SYT1
mun-novel72-5p	serine/threonine-protein kinase TAO3	TAOK3
mun-novel72-5p	tubulin-specific chaperone E	TBCE
mun-novel72-5p	F-box-like/WD repeat-containing protein TBL1X	TBL1X
mun-novel72-5p	tudor domain-containing protein 3	TDRD3
mun-novel72-5p	TM2 domain-containing protein 1	TM2D1
mun-novel72-5p	transmembrane 6 superfamily member 1	TM6SF1
mun-novel72-5p	transmembrane protein 180	TMEM180
mun-novel72-5p	transmembrane protein 222	TMEM222
mun-novel72-5p	transmembrane protein 243	TMEM243
mun-novel72-5p	thymosin beta-15A	TMSB15A
mun-novel72-5p	ubiquitin-conjugating enzyme E2 variant 2	UBE2V2
mun-novel72-5p	serine/threonine-protein kinase ULK2	ULK2
mun-novel72-5p	CAAX prenyl protease 1	ZMPSTE24
mun-novel8-3p	acetoacetyl-CoA synthetase	AACS
mun-novel8-3p	activin receptor type-1	ACVR1
mun-novel8-3p	adenylosuccinate synthetase isozyme 2	ADSS
mun-novel8-3p	zinc finger protein AEBP2	AEBP2
mun-novel8-3p	ankyrin-3	ANK3
mun-novel8-3p	annexin A5	ANXA5
mun-novel8-3p	ADP-ribosylation factor 4	ARF4
mun-novel8-3p	rho guanine nucleotide exchange factor 3	ARHGEF3
mun-novel8-3p	AT-rich interactive domain-containing protein 2	ARID2
mun-novel8-3p	ADP-ribosylation factor-like protein 3	ARL3
mun-novel8-3p	actin-related protein 2	ARP2
mun-novel8-3p	actin-related protein 8	ARP8
mun-novel8-3p	ubiquitin-like protein ATG12	ATG12
mun-novel8-3p	mitochondrial inner membrane protease ATP23	ATP23
mun-novel8-3p	UDP-GalNAc:beta-1,3-N-acetylgalactosaminyltransferase 2	B3GALNT2
mun-novel8-3p	BRCA1-associated protein	BAP1
mun-novel8-3p	B-cell lymphoma/leukemia 11A	BCL11A
mun-novel8-3p	basic immunoglobulin-like variable motif-containing protein	BIVM
mun-novel8-3p	bleomycin hydrolase	BLMH
mun-novel8-3p	bone morphogenetic protein receptor type-1B	BMPR1B
mun-novel8-3p	nucleosome-remodeling factor subunit BPTF	BPTF
mun-novel8-3p	voltage-dependent calcium channel gamma-3 subunit	CACNG3
mun-novel8-3p	calmodulin	CaM
mun-novel8-3p	calcium/calmodulin-dependent protein kinase type IV	CAMK4
mun-novel8-3p	CAS1 domain-containing protein 1	CASD1
mun-novel8-3p	peripheral plasma membrane protein CASK	CASK
mun-novel8-3p	coiled-coil domain-containing protein 111	CCDC111
mun-novel8-3p	cyclin-C	CCNC
mun-novel8-3p	platelet glycoprotein 4	CD36
mun-novel8-3p	cell division cycle-associated protein 4	CDCA4
mun-novel8-3p	cadherin-2	CDH2
mun-novel8-3p	cat eye syndrome critical region protein 2	CECR2
mun-novel8-3p	chromodomain-helicase-DNA-binding protein 4	CHD4
mun-novel8-3p	cirhin	CIRH1A
mun-novel8-3p	cellular nucleic acid-binding protein	CNBP
mun-novel8-3p	nuclear envelope phosphatase-regulatory subunit 1	CNEP1R1
[truncated: 145 more rows]

## Sheet: sort_by_gene_symbol
Supplemental Table S6. The list of predicted multiple miRNAs target genes.
miRNA name	Description	Gene symbol
mun-novel8-3p	acetoacetyl-CoA synthetase	AACS
mun-miR-215-5p	thioredoxin-like protein AAED1	AAED1
mun-novel72-5p	alanine--tRNA ligase, mitochondrial	AARS2
mun-miR-2954-3p	alpha/beta hydrolase domain-containing protein 17B	ABHD17B
mun-miR-194-5p	alpha/beta hydrolase domain-containing protein 17C	ABHD17C
mun-novel45-3p	alpha/beta hydrolase domain-containing protein 17C	ABHD17C
mun-novel31-3p	abhydrolase domain-containing protein 2	ABHD2
mun-novel72-3p	abhydrolase domain-containing protein 2	ABHD2
mun-novel72-3p	abl interactor 1	ABI1
mun-novel72-3p	abl interactor 1	ABI1
mun-miR-194-5p	actin-binding LIM protein 1	ABLIM1
mun-novel7-3p	actin-binding LIM protein 3	ABLIM3
mun-novel72-5p	active breakpoint cluster region-related protein	ABR
mun-miR-2954-3p	BRISC complex subunit Abro1	ABRAXAS2
mun-novel102-3p	BRISC complex subunit Abro1	ABRAXAS2
mun-novel45-3p	ankyrin repeat and BTB/POZ domain-containing protein 1	ABTB1
mun-miR-194-5p	acyl-CoA-binding domain-containing protein 5	ACBD5
mun-novel102-3p	acyl-CoA-binding domain-containing protein 5	ACBD5
mun-novel72-3p	alkaline ceramidase 2	ACER2
mun-miR-2954-3p	cytoplasmic aconitate hydratase	ACO1
mun-miR-2954-3p	acyl-coenzyme A thioesterase 13	ACOT13
mun-novel72-3p	acyl-coenzyme A thioesterase 13	ACOT13
mun-novel72-5p	long-chain-fatty-acid--CoA ligase ACSBG1	ACSBG1
mun-novel7-3p	alpha-actinin-1	ACTN1
mun-novel8-3p	activin receptor type-1	ACVR1
mun-novel7-3p	activin receptor type-2A	ACVR2A
mun-novel102-3p	A disintegrin and metalloproteinase with thrombospondin motifs 1	ADAMTS1
mun-novel45-3p	A disintegrin and metalloproteinase with thrombospondin motifs 17	ADAMTS17
mun-novel68-3p	double-stranded RNA-specific editase B2	ADARB2
mun-novel7-3p	double-stranded RNA-specific editase B2	ADARB2
mun-miR-194-5p	uncharacterized aarF domain-containing protein kinase 1	ADCK1
mun-miR-2954-3p	latrophilin-2	ADGRL2
mun-novel46-3p	EGF, latrophilin and seven transmembrane domain-containing protein 1	ADGRL4
mun-novel102-3p	hydroxyacid-oxoacid transhydrogenase, mitochondrial	ADHFE1
mun-novel68-3p	1,2-dihydroxy-3-keto-5-methylthiopentene dioxygenase	ADI1
mun-miR-2954-3p	adiponectin receptor protein 2	ADIPOR2
mun-novel45-3p	adenosine kinase	ADK
mun-miR-215-5p	activity-dependent neuroprotector homeobox protein	ADNP
mun-novel29-3p	activity-dependent neuroprotector homeobox protein	ADNP
mun-novel66-3p	adenosine receptor A2a	ADORA2A
mun-novel7-3p	adenosine receptor A2a	ADORA2A
mun-miR-203-5p	[Protein ADP-ribosylarginine] hydrolase-like protein 1	ADPRHL1
mun-miR-2954-3p	[Protein ADP-ribosylarginine] hydrolase-like protein 1	ADPRHL1
mun-novel8-3p	adenylosuccinate synthetase isozyme 2	ADSS
mun-novel8-3p	zinc finger protein AEBP2	AEBP2
mun-novel46-3p	AFG3-like protein 2	AFG3L2
mun-novel45-3p	aftiphilin	AFTPH
mun-novel68-3p	arf-GAP with GTPase, ANK repeat and PH domain-containing protein 1	AGAP1
mun-miR-2954-3p	acylglycerol kinase, mitochondrial	AGK
mun-novel7-3p	acylglycerol kinase, mitochondrial	AGK
mun-novel72-5p	glycogen debranching enzyme	AGL
mun-novel68-3p	protein argonaute-1	AGO1
mun-novel7-3p	protein argonaute-3	AGO3
mun-novel102-3p	anterior gradient protein 2	AGR2
mun-novel45-3p	axin interactor, dorsalization-associated protein	AIDA
mun-novel72-3p	axin interactor, dorsalization-associated protein	AIDA
mun-novel72-3p	adenylate kinase 8	AK8
mun-miR-2954-3p	A-kinase anchor protein 13	AKAP13
mun-novel72-5p	A-kinase anchor protein 9	AKAP9
mun-novel7-3p	alcohol dehydrogenase [NADP(+)]	AKR1A1
mun-novel7-3p	RAC-alpha serine/threonine-protein kinase	AKT1
mun-miR-2954-3p	AKT-interacting protein	AKTIP
mun-novel102-3p	retinal dehydrogenase 2	ALDH1A2
mun-novel72-3p	retinal dehydrogenase 2	ALDH1A2
mun-novel72-5p	retinal dehydrogenase 2	ALDH1A2
mun-novel31-3p	alpha-1,2-mannosyltransferase ALG9	ALG9
mun-miR-2954-3p	THO complex subunit 4	ALYREF
mun-novel31-3p	APC membrane recruitment protein 2	AMER2
mun-novel46-3p	APC membrane recruitment protein 2	AMER2
mun-novel72-5p	anaphase-promoting complex subunit 2	ANAPC2
mun-novel72-3p	anaphase-promoting complex subunit 4	ANAPC4
mun-novel45-3p	anaphase-promoting complex subunit 7	ANAPC7
mun-novel8-3p	ankyrin-3	ANK3
mun-miR-194-5p	ankyrin repeat domain-containing protein 10	ANKRD10
mun-novel29-3p	ankyrin repeat domain-containing protein 10	ANKRD10
mun-novel66-3p	ankyrin repeat domain-containing protein 17	ANKRD17
mun-novel31-3p	ankyrin repeat domain-containing protein 37	ANKRD37
mun-miR-194-5p	anoctamin-10	ANO10
mun-novel102-3p	anoctamin-10	ANO10
mun-novel102-3p	annexin A5	ANXA5
mun-novel8-3p	annexin A5	ANXA5
mun-novel102-3p	AP-1 complex subunit gamma-1	AP1G1
mun-novel72-3p	AP-1 complex subunit gamma-1	AP1G1
mun-miR-194-5p	AP-1 complex subunit mu-1	AP1M1
mun-novel72-3p	AP-1 complex subunit mu-1	AP1M1
mun-novel72-3p	AP-1 complex subunit sigma-2	AP1S2
mun-miR-194-5p	AP-2 complex subunit mu	AP2M1
mun-novel46-3p	AP-2 complex subunit mu	AP2M1
mun-novel31-3p	AP-3 complex subunit beta-1	AP3B1
mun-novel102-3p	AP-3 complex subunit mu-1	AP3M1
mun-miR-2954-3p	AP-3 complex subunit sigma-1	AP3S1
mun-novel72-3p	apoptosis inhibitor 5	API5
mun-novel72-3p	NAD(P)H-hydrate epimerase	APOA1BP
mun-novel68-3p	probable C->EU-editing enzyme APOBEC-2	APOBEC2
mun-novel24-5p	amyloid beta A4 protein	APP
mun-novel7-3p	amyloid beta A4 protein	APP
mun-miR-203-5p	amyloid protein-binding protein 2	APPBP2
mun-miR-194-5p	aquaporin-4	AQP4
mun-novel72-5p	aquaporin-4	AQP4
mun-novel7-3p	apoptosis-resistant E3 ubiquitin protein ligase 1	AREL1
mun-novel72-5p	apoptosis-resistant E3 ubiquitin protein ligase 1	AREL1
mun-novel66-3p	ADP-ribosylation factor 1	ARF1
mun-novel8-3p	ADP-ribosylation factor 4	ARF4
mun-miR-2954-3p	ADP-ribosylation factor 6	ARF6
mun-miR-215-5p	brefeldin A-inhibited guanine nucleotide-exchange protein 1	ARFGEF1
mun-miR-2954-3p	brefeldin A-inhibited guanine nucleotide-exchange protein 1	ARFGEF1
mun-novel102-3p	rho GTPase-activating protein 42	ARHGAP42
mun-novel8-3p	rho guanine nucleotide exchange factor 3	ARHGEF3
mun-novel8-3p	AT-rich interactive domain-containing protein 2	ARID2
mun-miR-194-5p	E3 ubiquitin-protein ligase ARIH1	ARIH1
mun-novel46-3p	E3 ubiquitin-protein ligase ARIH2	ARIH2
mun-novel66-3p	E3 ubiquitin-protein ligase ARIH2	ARIH2
mun-novel8-3p	ADP-ribosylation factor-like protein 3	ARL3
mun-novel66-3p	ADP-ribosylation factor-like protein 5A	ARL5A
mun-novel66-3p	PRA1 family protein 3	ARL6IP5
mun-novel72-3p	PRA1 family protein 3	ARL6IP5
mun-novel29-3p	actin-related protein 2	ARP2
mun-novel66-3p	actin-related protein 2	ARP2
mun-novel72-5p	actin-related protein 2	ARP2
mun-novel8-3p	actin-related protein 2	ARP2
mun-novel102-3p	actin-related protein 3B	ARP3B
mun-novel46-3p	actin-related protein 3B	ARP3B
mun-novel72-3p	actin-related protein 3B	ARP3B
mun-novel45-3p	actin-related protein 8	ARP8
mun-novel8-3p	actin-related protein 8	ARP8
mun-novel45-3p	actin-related protein 2/3 complex subunit 3	ARPC3
mun-novel7-3p	arrestin domain-containing protein 1	ARRDC1
mun-novel31-3p	armadillo repeat protein deleted in velo-cardio-facial syndrome	ARVCF
mun-novel68-3p	armadillo repeat protein deleted in velo-cardio-facial syndrome	ARVCF
mun-miR-194-5p	arf-GAP with SH3 domain, ANK repeat and PH domain-containing protein 1	ASAP1
mun-novel7-3p	histone-lysine N-methyltransferase ASH1L	ASH1L
mun-novel31-3p	asparagine synthetase [glutamine-hydrolyzing]	ASNS
mun-novel102-3p	argininosuccinate synthase	ASS1
mun-novel29-3p	ATPase family AAA domain-containing protein 1	ATAD1
mun-novel45-3p	ubiquitin-like protein ATG12	ATG12
mun-novel8-3p	ubiquitin-like protein ATG12	ATG12
mun-novel29-3p	autophagy-related protein 16-1	ATG16L1
mun-miR-194-5p	cysteine protease ATG4A	ATG4A
mun-novel7-3p	autophagy protein 5	ATG5
mun-miR-194-5p	antithrombin-III	ATIII
mun-novel7-3p	antithrombin-III	ATIII
mun-novel29-3p	atlastin-2	ATL2
mun-novel7-3p	atlastin-2	ATL2
mun-novel72-5p	atlastin-2	ATL2
mun-novel46-3p	copper transport protein ATOX1	ATOX1
mun-miR-2954-3p	sodium/potassium-transporting ATPase subunit alpha-1	ATP1A1
mun-novel8-3p	mitochondrial inner membrane protease ATP23	ATP23
mun-novel46-3p	sarcoplasmic/endoplasmic reticulum calcium ATPase 2	ATP2A2
mun-novel29-3p	calcium-transporting ATPase type 2C member 1	ATP2C1
mun-novel7-3p	V-type proton ATPase catalytic subunit A	ATP6V1A
mun-novel45-3p	V-type proton ATPase subunit C 1	ATP6V1C1
mun-novel45-3p	V-type proton ATPase subunit D	ATP6V1D
mun-novel29-3p	V-type proton ATPase subunit E 1	ATP6V1E1
mun-novel45-3p	V-type proton ATPase subunit G 1	ATP6V1G1
mun-novel72-3p	V-type proton ATPase subunit G 1	ATP6V1G1
mun-novel31-3p	V-type proton ATPase subunit H	ATP6V1H
mun-novel36-3p	probable phospholipid-transporting ATPase IA	ATP8A1
mun-novel7-3p	ATP synthase mitochondrial F1 complex assembly factor 2	ATPAF2
mun-novel72-5p	ATP synthase mitochondrial F1 complex assembly factor 2	ATPAF2
mun-novel45-3p	ataxin-7-like protein 1	ATXN7L1
mun-miR-2954-3p	autism susceptibility gene 2 protein	AUTS2
mun-novel46-3p	autism susceptibility gene 2 protein	AUTS2
mun-novel29-3p	late secretory pathway protein AVL9	AVL9
mun-novel72-3p	late secretory pathway protein AVL9	AVL9
mun-novel7-3p	5-azacytidine-induced protein 2	AZI2
mun-novel68-3p	antizyme inhibitor 1	AZIN1
mun-novel68-3p	UDP-GalNAc:beta-1,3-N-acetylgalactosaminyltransferase 2	B3GALNT2
mun-novel8-3p	UDP-GalNAc:beta-1,3-N-acetylgalactosaminyltransferase 2	B3GALNT2
mun-novel72-3p	beta-1,3-galactosyltransferase 1	B3GALT1
mun-novel102-3p	UDP-GlcNAc:betaGal beta-1,3-N-acetylglucosaminyltransferase 7	B3GNT7
mun-novel72-3p	UDP-GlcNAc:betaGal beta-1,3-N-acetylglucosaminyltransferase 7	B3GNT7
mun-novel29-3p	B9 domain-containing protein 1	B9D1
mun-novel66-3p	B9 domain-containing protein 1	B9D1
mun-novel72-3p	BAG family molecular chaperone regulator 3	BAG3
mun-novel72-3p	brain-specific angiogenesis inhibitor 1-associated protein 2	BAIAP2
mun-novel102-3p	protein BANP	BANP
mun-miR-2954-3p	BRCA1-associated protein	BAP1
mun-novel8-3p	BRCA1-associated protein	BAP1
mun-novel102-3p	2-oxoisovalerate dehydrogenase subunit beta, mitochondrial	BCKDHB
mun-novel8-3p	B-cell lymphoma/leukemia 11A	BCL11A
mun-miR-194-5p	B-cell CLL/lymphoma 9 protein	BCL9
mun-novel72-3p	B-cell CLL/lymphoma 9 protein	BCL9
mun-novel45-3p	BEN domain-containing protein 4	BEND4
mun-novel7-3p	BEN domain-containing protein 7	BEND7
mun-novel72-3p	betaine--homocysteine S-methyltransferase 1	BHMT
mun-miR-203-5p	baculoviral IAP repeat-containing protein 6	BIRC6
mun-novel45-3p	basic immunoglobulin-like variable motif-containing protein	BIVM
mun-novel8-3p	basic immunoglobulin-like variable motif-containing protein	BIVM
mun-novel8-3p	bleomycin hydrolase	BLMH
mun-novel7-3p	bcl-2-modifying factor	BMF
mun-novel102-3p	bone morphogenetic protein 2	BMP2
mun-novel72-3p	bone morphogenetic protein 2	BMP2
mun-novel72-3p	bone morphogenetic protein 3B	BMP3B
mun-novel68-3p	bone morphogenetic protein 7	BMP7
mun-novel66-3p	bone morphogenetic protein receptor type-1B	BMPR1B
mun-novel8-3p	bone morphogenetic protein receptor type-1B	BMPR1B
mun-miR-194-5p	biorientation of chromosomes in cell division protein 1	BOD1
mun-novel7-3p	bisphosphoglycerate mutase	BPGM
mun-novel29-3p	nucleosome-remodeling factor subunit BPTF	BPTF
mun-novel66-3p	nucleosome-remodeling factor subunit BPTF	BPTF
mun-novel8-3p	nucleosome-remodeling factor subunit BPTF	BPTF
mun-novel7-3p	serine/threonine-protein kinase B-raf	BRAF
mun-novel102-3p	lys-63-specific deubiquitinase BRCC36	BRCC3
mun-novel45-3p	bromodomain-containing protein 7	BRD7
mun-novel66-3p	bromodomain-containing protein 7	BRD7
mun-novel102-3p	serine/threonine-protein kinase BRSK2	BRSK2
mun-novel72-3p	serine/threonine-protein kinase BRSK2	BRSK2
mun-novel72-3p	TATA-binding protein-associated factor 172	BTAF1
mun-novel45-3p	BTB/POZ domain-containing protein 2	BTBD2
mun-novel72-3p	biotinidase	BTD
mun-novel66-3p	bystin	BYSL
mun-miR-194-5p	basic leucine zipper and W2 domain-containing protein 1	BZW1
mun-miR-2954-3p	UPF0668 protein C10orf76	C10orf76
mun-miR-2954-3p	UPF0454 protein C12orf49	C12orf49
mun-novel45-3p	UPF0536 protein C12orf66	C12orf66
mun-novel102-3p	C12orf73	C12orf73
mun-miR-194-5p	C15orf41	C15orf41
mun-novel45-3p	UPF0183 protein C16orf70	C16orf70
mun-novel66-3p	UPF0183 protein C16orf70	C16orf70
mun-miR-194-5p	UPF0468 protein C16orf80	C16orf80
mun-novel72-3p	UPF0587 protein C1orf123	C1orf123
mun-novel68-3p	complement component 1 Q subcomponent-binding protein, mitochondrial	C1QBP
mun-novel72-5p	C3a anaphylatoxin chemotactic receptor	C3AR1
mun-novel31-3p	C3orf26	C3orf26
mun-novel36-3p	C3orf26	C3orf26
mun-novel7-3p	C6orf203	C6orf203
mun-novel7-3p	C7orf26	C7orf26
mun-miR-194-5p	UPF0532 protein C7orf60	C7orf60
mun-miR-2954-3p	C7orf63	C7orf63
mun-novel31-3p	C7orf73	C7orf73
mun-miR-203-5p	C9orf171	C9orf171
mun-miR-2954-3p	C9orf84	C9orf84
mun-novel7-3p	carbonic anhydrase 9	CA9
mun-novel45-3p	CDK5 and ABL1 enzyme substrate 1	CABLES1
mun-novel29-3p	CDK5 and ABL1 enzyme substrate 2	CABLES2
mun-novel66-3p	calcium-binding protein 1	CABP1
mun-novel45-3p	voltage-dependent L-type calcium channel subunit alpha-1D	CACNA1D
mun-novel46-3p	voltage-dependent L-type calcium channel subunit beta-2	CACNB2
mun-novel68-3p	voltage-dependent L-type calcium channel subunit beta-2	CACNB2
mun-novel7-3p	voltage-dependent L-type calcium channel subunit beta-2	CACNB2
mun-novel72-3p	voltage-dependent L-type calcium channel subunit beta-2	CACNB2
mun-novel68-3p	voltage-dependent L-type calcium channel subunit beta-4	CACNB4
mun-novel8-3p	voltage-dependent calcium channel gamma-3 subunit	CACNG3
mun-novel101-3p	CDK2-associated and cullin domain-containing protein 1	CACUL1
mun-novel45-3p	cell adhesion molecule 2	CADM2
mun-novel10-3p	calcium-dependent secretion activator 1	CADPS
mun-novel15-3p	calcium-dependent secretion activator 1	CADPS
mun-novel68-3p	calcium-dependent secretion activator 1	CADPS
mun-miR-194-5p	calmodulin	CaM
mun-novel102-3p	calmodulin	CaM
mun-novel29-3p	calmodulin	CaM
mun-novel46-3p	calmodulin	CaM
mun-novel8-3p	calmodulin	CaM
mun-novel45-3p	calcium/calmodulin-dependent protein kinase type 1D	CAMK1D
mun-novel7-3p	calcium/calmodulin-dependent protein kinase type II subunit alpha	CAMK2A
mun-miR-2954-3p	calcium/calmodulin-dependent protein kinase type IV	CAMK4
mun-novel8-3p	calcium/calmodulin-dependent protein kinase type IV	CAMK4
mun-novel45-3p	calcium/calmodulin-dependent protein kinase kinase 2	CAMKK2
mun-miR-194-5p	calmodulin-regulated spectrin-associated protein 1	CAMSAP1
mun-novel102-3p	calmodulin-regulated spectrin-associated protein 2	CAMSAP2
mun-miR-2954-3p	cullin-associated NEDD8-dissociated protein 1	CAND1
mun-novel36-3p	calnexin	CANX
mun-novel7-3p	calnexin	CANX
mun-novel7-3p	adenylyl cyclase-associated protein 1	CAP1
mun-novel29-3p	F-actin-capping protein subunit alpha-1	CAPZA1
mun-miR-2954-3p	caspase recruitment domain-containing protein 11	CARD11
mun-novel29-3p	cancer susceptibility candidate protein 1	CASC1
mun-novel72-3p	protein CASC4	CASC4
mun-novel72-3p	CAS1 domain-containing protein 1	CASD1
mun-novel8-3p	CAS1 domain-containing protein 1	CASD1
mun-miR-203-5p	peripheral plasma membrane protein CASK	CASK
mun-novel31-3p	peripheral plasma membrane protein CASK	CASK
mun-novel36-3p	peripheral plasma membrane protein CASK	CASK
mun-novel8-3p	peripheral plasma membrane protein CASK	CASK
mun-novel102-3p	caveolin-1	CAV1
mun-novel36-3p	caveolin-1	CAV1
mun-novel31-3p	protein CBFA2T1	CBFA2T1
mun-novel72-5p	protein CBFA2T1	CBFA2T1
mun-novel66-3p	core-binding factor subunit beta	CBFB
mun-novel72-5p	E3 ubiquitin-protein ligase CBL	CBL
mun-novel29-3p	E3 ubiquitin-protein ligase Hakai	CBLL1
mun-novel7-3p	cerebellin-4	CBLN4
mun-miR-375-3p	protein chibby 1	CBY1
mun-novel7-3p	coiled-coil domain-containing protein 102A	CCDC102A
mun-novel8-3p	coiled-coil domain-containing protein 111	CCDC111
mun-novel36-3p	coiled-coil domain-containing protein 39	CCDC39
mun-novel31-3p	coiled-coil domain-containing protein 43	CCDC43
mun-miR-194-5p	coiled-coil domain-containing protein 6	CCDC6
mun-novel31-3p	coiled-coil domain-containing protein 80	CCDC80
mun-novel72-3p	coiled-coil domain-containing protein 80	CCDC80
mun-miR-2954-3p	coiled-coil domain-containing protein 93	CCDC93
mun-novel72-3p	coiled-coil domain-containing protein 93	CCDC93
mun-miR-215-5p	cyclin-C	CCNC
mun-novel102-3p	cyclin-C	CCNC
mun-novel29-3p	cyclin-C	CCNC
mun-novel8-3p	cyclin-C	CCNC
mun-novel29-3p	G1/S-specific cyclin-D2	CCND2
mun-novel72-5p	G1/S-specific cyclin-D2	CCND2
mun-miR-2954-3p	G1/S-specific cyclin-E1	CCNE1
mun-novel72-3p	T-complex protein 1 subunit delta	CCT4
mun-miR-194-5p	CD151 antigen	CD151
mun-novel7-3p	CD151 antigen	CD151
mun-novel102-3p	sialomucin core protein 24	CD164
mun-novel72-3p	sialomucin core protein 24	CD164
mun-novel8-3p	platelet glycoprotein 4	CD36
mun-miR-375-3p	pre-mRNA-processing factor 17	CDC40
mun-novel45-3p	pre-mRNA-processing factor 17	CDC40
mun-miR-194-5p	cell division control protein 42	CDC42ÃŠ
mun-novel7-3p	cell division control protein 42	CDC42ÃŠ
mun-novel29-3p	serine/threonine-protein kinase MRCK beta	CDC42BPB
mun-novel45-3p	parafibromin	CDC73
mun-novel68-3p	parafibromin	CDC73
mun-novel8-3p	cell division cycle-associated protein 4	CDCA4
mun-novel29-3p	cadherin-11	CDH11
mun-novel66-3p	cadherin-11	CDH11
mun-miR-2954-3p	cadherin-12	CDH12
mun-novel8-3p	cadherin-2	CDH2
mun-novel66-3p	cadherin-6	CDH6
mun-novel102-3p	cadherin-related family member 1	CDHR1
mun-novel29-3p	cadherin-related family member 1	CDHR1
mun-novel72-3p	cadherin-related family member 1	CDHR1
mun-novel29-3p	cyclin-dependent kinase 17	CDK17
mun-novel7-3p	cyclin-dependent kinase 17	CDK17
mun-novel45-3p	CDKN2A-interacting protein	CDKN2AIP
mun-novel102-3p	protein CDV3	CDV3
mun-novel36-3p	protein CDV3	CDV3
mun-novel102-3p	CCAAT/enhancer-binding protein zeta	CEBPZ
mun-novel7-3p	CCAAT/enhancer-binding protein zeta	CEBPZ
mun-novel8-3p	cat eye syndrome critical region protein 2	CECR2
mun-novel7-3p	CUGBP Elav-like family member 1	CELF1
mun-novel7-3p	CUGBP Elav-like family member 2	CELF1
mun-novel29-3p	centrosomal protein of 170 kDa	CEP170
mun-miR-194-5p	cofilin-2	CFL2
mun-novel29-3p	cofilin-2	CFL2
mun-novel29-3p	coiled-coil-helix-coiled-coil-helix domain-containing protein 2, mitochondrial	CHCHD2
mun-novel102-3p	mitochondrial intermembrane space import and assembly protein 40	CHCHD4
mun-novel45-3p	mitochondrial intermembrane space import and assembly protein 40	CHCHD4
mun-miR-194-5p	chromodomain-helicase-DNA-binding protein 4	CHD4
mun-novel7-3p	chromodomain-helicase-DNA-binding protein 4	CHD4
mun-novel8-3p	chromodomain-helicase-DNA-binding protein 4	CHD4
mun-novel72-3p	chromodomain-helicase-DNA-binding protein 7	CHD7
mun-novel29-3p	chromodomain-helicase-DNA-binding protein 9	CHD9
mun-novel7-3p	chromodomain-helicase-DNA-binding protein 9	CHD9
mun-novel45-3p	E3 ubiquitin-protein ligase CHFR	CHFR
mun-novel29-3p	choline kinase alpha	CHKA
mun-novel72-3p	choline kinase alpha	CHKA
mun-novel72-5p	choline kinase alpha	CHKA
mun-novel72-3p	charged multivesicular body protein 2b	CHMP2B
mun-miR-2954-3p	charged multivesicular body protein 6	CHMP6
mun-novel72-3p	N-chimaerin	CHN1
mun-miR-194-5p	cholinephosphotransferase 1	CHPT1
mun-novel102-3p	chordin-like protein 1	CHRDL1
mun-novel66-3p	chordin-like protein 1	CHRDL1
mun-novel72-5p	muscarinic acetylcholine receptor M2	CHRM2
mun-novel45-3p	carbohydrate sulfotransferase 1	CHST1
mun-novel102-3p	carbohydrate sulfotransferase 10	CHST10
mun-novel72-3p	carbohydrate sulfotransferase 10	CHST10
mun-miR-2954-3p	carbohydrate sulfotransferase 15	CHST15
mun-novel102-3p	carbohydrate sulfotransferase 15	CHST15
mun-novel72-3p	carbohydrate sulfotransferase 9	CHST9
mun-miR-2954-3p	chondroitin sulfate synthase 3	CHSY3
mun-novel29-3p	chromatin target of PRMT1 protein	CHTOP
mun-novel7-3p	anamorsin	CIAPIN1
mun-novel31-3p	cold-inducible RNA-binding protein	CIRBP
mun-novel8-3p	cirhin	CIRH1A
mun-novel29-3p	cytoskeleton-associated protein 5	CKAP5
mun-novel45-3p	cytoskeleton-associated protein 5	CKAP5
mun-miR-194-5p	chemokine-like factor	CKLF
mun-miR-194-5p	creatine kinase U-type, mitochondrial	CKMT1A
mun-novel72-3p	UPF0444 transmembrane protein C12orf23	CL023
mun-novel7-3p	CLIP-associating protein 2	CLASP2
mun-novel72-3p	CLIP-associating protein 2	CLASP2
mun-novel7-3p	C-type lectin domain family 3 member A	CLEC3A
mun-miR-194-5p	dual specificity protein kinase CLK4	CLK4
mun-novel102-3p	calmin	CLMN
mun-novel72-3p	calmin	CLMN
mun-novel29-3p	methylosome subunit pICln	CLNS1A
mun-miR-203-5p	calsyntenin-1	CLSTN1
mun-novel102-3p	calsyntenin-1	CLSTN1
mun-novel7-3p	calsyntenin-1	CLSTN1
mun-novel7-3p	clathrin light chain B	CLTB
mun-novel29-3p	clathrin heavy chain 1	CLTC
mun-novel29-3p	clustered mitochondria protein	CLUH
mun-novel45-3p	N-acylneuraminate cytidylyltransferase	CMAS
mun-novel29-3p	UMP-CMP kinase	CMPK1
mun-novel8-3p	cellular nucleic acid-binding protein	CNBP
mun-novel7-3p	cytosolic non-specific dipeptidase	CNDP2
mun-miR-215-5p	nuclear envelope phosphatase-regulatory subunit 1	CNEP1R1
mun-novel102-3p	nuclear envelope phosphatase-regulatory subunit 1	CNEP1R1
mun-novel8-3p	nuclear envelope phosphatase-regulatory subunit 1	CNEP1R1
mun-miR-194-5p	connector enhancer of kinase suppressor of ras 3	CNKSR3
mun-novel29-3p	metal transporter CNNM2	CNNM2
mun-novel66-3p	CCR4-NOT transcription complex subunit 11	CNOT11
mun-novel7-3p	CCR4-NOT transcription complex subunit 4	CNOT4
mun-novel24-5p	CCR4-NOT transcription complex subunit 6	CNOT6
mun-novel102-3p	CCR4-NOT transcription complex subunit 7	CNOT7
mun-novel72-3p	CCR4-NOT transcription complex subunit 7	CNOT7
mun-novel68-3p	cell differentiation protein RCD1	CNOT9
mun-novel72-3p	cannabinoid receptor 1	CNR1
mun-novel10-3p	contactin-2	CNTN2
mun-novel15-3p	contactin-2	CNTN2
mun-novel45-3p	conserved oligomeric Golgi complex subunit 6	COG6
mun-novel66-3p	conserved oligomeric Golgi complex subunit 6	COG6
mun-novel102-3p	collagen alpha-1(X) chain	COL10A1
mun-miR-2954-3p	collagen alpha-1(XII) chain	COL12A1
mun-novel29-3p	collagen alpha-2(I) chain	COL2A1
mun-novel31-3p	collagen alpha-1(III) chain	COL3A1
mun-novel7-3p	collagen alpha-1(IV) chain	COL4A1
mun-novel8-3p	coatomer subunit alpha	COPA
mun-novel66-3p	COP9 signalosome complex subunit 2	COPS2
mun-novel7-3p	COP9 signalosome complex subunit 4	COPS4
mun-novel72-5p	COP9 signalosome complex subunit 7a	COPS7A
mun-novel102-3p	COP9 signalosome complex subunit 7b	COPS7B
mun-novel8-3p	COP9 signalosome complex subunit 7b	COPS7B
mun-novel36-3p	4-hydroxybenzoate polyprenyltransferase, mitochondrial	COQ2
mun-novel7-3p	copine-2	CPNE2
mun-miR-2954-3p	copine-7	CPNE7
mun-novel45-3p	copine-7	CPNE7
mun-novel68-3p	cleavage and polyadenylation specificity factor subunit 3	CPSF3
mun-novel7-3p	cleavage and polyadenylation specificity factor subunit 4	CPSF4
mun-novel29-3p	carnitine O-palmitoyltransferase 1, liver isoform	CPT1A
mun-novel29-3p	death domain-containing protein CRADD	CRADD
mun-novel8-3p	death domain-containing protein CRADD	CRADD
mun-novel72-3p	cyclic AMP-responsive element-binding protein 1	CREB1
mun-novel8-3p	CREB-binding protein	CREBBP
mun-miR-194-5p	cAMP-responsive element-binding protein-like 2	CREBL2
mun-novel102-3p	cAMP-responsive element-binding protein-like 2	CREBL2
mun-novel68-3p	corticotropin-releasing factor-binding protein	CRF
mun-novel102-3p	corticotropin-releasing factor receptor 2	CRHR2
mun-novel72-3p	corticotropin-releasing factor receptor 2	CRHR2
mun-novel102-3p	adapter molecule crk	CRK
mun-novel31-3p	adapter molecule crk	CRK
mun-novel46-3p	adapter molecule crk	CRK
mun-miR-203-5p	cold shock domain-containing protein E1	CSDE1
mun-novel102-3p	cold shock domain-containing protein E1	CSDE1
mun-novel45-3p	CUB and sushi domain-containing protein 3	CSMD3
mun-miR-203-5p	casein kinase I isoform gamma-1	CSNK1G1
mun-novel7-3p	casein kinase I isoform gamma-1	CSNK1G1
mun-novel68-3p	casein kinase I isoform gamma-3	CSNK1G3
mun-novel29-3p	casein kinase II subunit alpha'	CSNK2A2
mun-novel66-3p	casein kinase II subunit alpha'	CSNK2A2
mun-novel102-3p	cleavage stimulation factor subunit 1	CSTF1
mun-novel66-3p	cleavage stimulation factor subunit 1	CSTF1
mun-novel36-3p	C-terminal-binding protein 1	CTBP1
mun-novel31-3p	CTD small phosphatase-like protein 2	CTDSPL2
mun-novel29-3p	connective tissue growth factor	CTGF
mun-novel72-5p	cytotoxic T-lymphocyte protein 4	CTLA4
mun-novel72-3p	beta-catenin-interacting protein 1	CTNNBIP1
mun-novel29-3p	catenin delta-2	CTNND2
mun-novel7-3p	cathepsin D	CTSD
mun-novel7-3p	cortactin-binding protein 2	CTTNBP2
mun-novel66-3p	cullin-3	CUL3
mun-novel72-3p	cullin-3	CUL3
mun-miR-194-5p	stromal cell-derived factor 1	CXCL12
mun-novel31-3p	stromal cell-derived factor 1	CXCL12
mun-novel46-3p	stromal cell-derived factor 1	CXCL12
mun-novel29-3p	c-X-C motif chemokine 14	CXCL14
mun-novel45-3p	cytoglobin	CYGB
mun-novel7-3p	cytohesin-4	CYTH4
mun-miR-203-5p	dachshund 1	DACH1
mun-novel29-3p	dachshund 1	DACH1
mun-novel102-3p	dachshund 2	DACH2
mun-miR-194-5p	lipoamide acyltransferase component of branched-chain alpha-keto acid dehydrogenase complex, mitochondrial	DBT
mun-novel7-3p	DDB1- and CUL4-associated factor 17	DCAF17
mun-novel66-3p	discoidin, CUB and LCCL domain-containing protein 1	DCBLD1
mun-novel72-5p	dynactin subunit 3	DCTN3
mun-novel68-3p	DCN1-like protein 2	DCUN1D2
mun-miR-194-5p	DCN1-like protein 4	DCUN1D4
mun-novel29-3p	ATP-dependent RNA helicase DDX18	DDX18
mun-novel36-3p	ATP-dependent RNA helicase DDX18	DDX18
mun-novel7-3p	probable ATP-dependent RNA helicase DDX31	DDX31
mun-novel29-3p	ATP-dependent RNA helicase DDX3X	DDX3X
mun-novel66-3p	ATP-dependent RNA helicase DDX3X	DDX3X
mun-novel7-3p	ATP-dependent RNA helicase DDX3X	DDX3X
mun-novel7-3p	probable ATP-dependent RNA helicase DDX41	DDX41
mun-novel29-3p	probable ATP-dependent RNA helicase DDX46	DDX46
mun-novel8-3p	probable ATP-dependent RNA helicase DDX47	DDX47
mun-miR-203-5p	DENN domain-containing protein 2A	DENND2A
mun-novel102-3p	DENN domain-containing protein 5A	DENND2A
mun-novel102-3p	C-myc promoter-binding protein	DENND4A
mun-novel45-3p	C-myc promoter-binding protein	DENND4A
mun-novel7-3p	density-regulated protein	DENR
mun-novel29-3p	DEP domain-containing protein 5	DEPDC5
mun-novel31-3p	DEP domain-containing protein 5	DEPDC5
mun-novel36-3p	derlin-2	DERL2
mun-novel68-3p	desumoylating isopeptidase 1	DESI1
mun-miR-194-5p	desumoylating isopeptidase 2	DESI2
mun-novel8-3p	desumoylating isopeptidase 2	DESI2
mun-novel24-5p	protein DGCR14	DGCR14
mun-miR-194-5p	probable 2-oxoglutarate dehydrogenase E1 component DHKTD1, mitochondrial	DHTKD1
mun-novel102-3p	probable ATP-dependent RNA helicase DHX35	DHX35
mun-novel72-3p	probable ATP-dependent RNA helicase DHX35	DHX35
mun-miR-2954-3p	probable ATP-dependent RNA helicase DHX40	DHX40
mun-novel72-5p	disco-interacting protein 2 A	DIP2A
mun-novel66-3p	disco-interacting protein 2 B	DIP2B
mun-novel102-3p	disco-interacting protein 2 C	DIP2C
mun-novel29-3p	disco-interacting protein 2 C	DIP2C
mun-novel45-3p	disco-interacting protein 2 C	DIP2C
mun-novel8-3p	GTP-binding protein Di-Ras2	DIRAS2
mun-novel46-3p	dihydrolipoyl dehydrogenase, mitochondrial	DLD
mun-novel31-3p	disks large 1	DLG1
mun-novel31-3p	disks large 2	DLG1
mun-novel72-3p	disks large-associated protein 2	DLGAP2
mun-novel8-3p	disks large-associated protein 2	DLGAP2
mun-novel46-3p	delta-like protein 4	DLL4
mun-novel8-3p	delta-like protein 4	DLL4
mun-miR-2954-3p	dihydrolipoyllysine-residue succinyltransferase component of 2-oxoglutarate dehydrogenase complex, mitochondrial	DLST
mun-miR-194-5p	dnaJ subfamily C member 18	DNAJC18
mun-miR-215-5p	putative tyrosine-protein phosphatase auxilin	DNAJC6
mun-novel45-3p	putative tyrosine-protein phosphatase auxilin	DNAJC6
mun-novel66-3p	putative tyrosine-protein phosphatase auxilin	DNAJC6
mun-novel31-3p	dnaJ subfamily C member 7	DNAJC7
mun-novel72-5p	dnaJ subfamily C member 8	DNAJC8
mun-novel45-3p	dynamin-1	DNM1
mun-novel102-3p	dedicator of cytokinesis protein 4	DOCK4
mun-novel10-3p	zinc finger protein DPF3	DPF3
mun-novel15-3p	zinc finger protein DPF3	DPF3
mun-novel46-3p	zinc finger protein DPF3	DPF3
mun-novel7-3p	dolichol phosphate-mannose biosynthesis regulatory protein	DPM2
mun-novel31-3p	inactive dipeptidyl peptidase 10	DPP10
mun-novel8-3p	inactive dipeptidyl peptidase 10	DPP10
mun-novel7-3p	dipeptidyl peptidase 8	DPP8
mun-novel102-3p	probable C-mannosyltransferase DPY19L1	DPY19L1
mun-novel7-3p	dihydropyrimidinase-related protein 2	DPYSL2
mun-novel7-3p	protein Dr1	DR1
mun-novel29-3p	dual serine/threonine and tyrosine protein kinase	DSTYK
mun-novel45-3p	D-tyrosyl-tRNA(Tyr) deacylase 1	DTD1
mun-miR-194-5p	dystrobrevin alpha	DTNA
mun-miR-215-5p	dystrobrevin beta	DTNB
mun-novel72-5p	probable E3 ubiquitin-protein ligase DTX2	DTX2
mun-novel68-3p	dual specificity protein phosphatase 1	DUSP1
mun-novel29-3p	dual specificity protein phosphatase 10	DUSP10
mun-novel46-3p	dual specificity protein phosphatase 19	DUSP19
mun-novel68-3p	dual specificity protein phosphatase 6	DUSP6
mun-novel7-3p	dual specificity protein phosphatase 6	DUSP6
mun-novel72-3p	dual specificity protein phosphatase 6	DUSP6
mun-miR-215-5p	cytoplasmic dynein 1 heavy chain 1	DYNC1H1
mun-novel8-3p	cytoplasmic dynein 1 intermediate chain 1	DYNC1I1
mun-novel102-3p	cytoplasmic dynein 1 light intermediate chain 1	DYNC1LI1
mun-novel7-3p	cytoplasmic dynein 1 light intermediate chain 1	DYNC1LI1
mun-miR-194-5p	cytoplasmic dynein 1 light intermediate chain 2	DYNC1LI2
mun-novel72-5p	cytoplasmic dynein 1 light intermediate chain 2	DYNC1LI2
mun-novel72-5p	dynein light chain 2, cytoplasmic	DYNLL2
mun-miR-194-5p	dynein light chain Tctex-type 1	DYNLT1
mun-novel36-3p	transcription factor E2F5	E2F5
mun-miR-194-5p	ELL-associated factor 1	EAF1
mun-novel31-3p	ELL-associated factor 1	EAF1
mun-novel68-3p	receptor-binding cancer antigen expressed on SiSo cells	EBAG9
mun-novel72-3p	receptor-binding cancer antigen expressed on SiSo cells	EBAG9
mun-miR-194-5p	transcription factor COE1	EBF1
mun-novel68-3p	transcription factor COE2	EBF2
mun-novel102-3p	ectodysplasin-A receptor-associated adapter protein	EDARADD
mun-novel102-3p	endothelial differentiation-related factor 1	EDF1
mun-novel66-3p	endothelial differentiation-related factor 1	EDF1
mun-miR-2954-3p	EGF-like repeat and discoidin I-like domain-containing protein 3	EDIL3
mun-novel7-3p	EGF-like repeat and discoidin I-like domain-containing protein 3	EDIL3
mun-novel29-3p	elongation factor 1-alpha 1	EEF1A1
mun-novel31-3p	eukaryotic translation elongation factor 1 epsilon-1	EEF1E1
mun-novel31-3p	EF-hand calcium-binding domain-containing protein 14	EFCAB14
mun-novel36-3p	EF-hand calcium-binding domain-containing protein 14	EFCAB14
mun-novel29-3p	116 kDa U5 small nuclear ribonucleoprotein component	EFTUD2
mun-novel29-3p	delta and Notch-like epidermal growth factor-related receptor	EGF
mun-novel45-3p	delta and Notch-like epidermal growth factor-related receptor	EGF
mun-novel72-3p	EH domain-containing protein 3	EHD3
mun-novel66-3p	translation initiation factor eIF-2B subunit beta	EIF2B2
mun-novel68-3p	translation initiation factor eIF-2B subunit delta	EIF2B2
mun-novel8-3p	eukaryotic translation initiation factor 2 subunit 3	EIF2S3
mun-novel72-3p	eukaryotic translation initiation factor 3 subunit A	EIF2SA
mun-novel7-3p	eukaryotic translation initiation factor 4H	EIF4H
mun-novel68-3p	eukaryotic translation initiation factor 5A-2	EIF5A2
mun-miR-194-5p	zinc phosphodiesterase ELAC protein 1	ELAC1
mun-miR-2954-3p	ELAV-like protein 2	ELAVL2
mun-novel68-3p	ELAV-like protein 4	ELAVL2
mun-novel72-5p	ELAV-like protein 4	ELAVL2
mun-novel45-3p	ETS-related transcription factor Elf-1	ELF1
mun-miR-194-5p	ETS-related transcription factor Elf-2	ELF2
mun-miR-2954-3p	ELMO domain-containing protein 1	ELMOD1
mun-novel36-3p	ELMO domain-containing protein 1	ELMOD1
mun-novel7-3p	ELMO domain-containing protein 2	ELMOD2
mun-novel102-3p	transcription elongation factor B polypeptide 1	ELOC
mun-novel31-3p	elongation of very long chain fatty acids protein 1	ELOVL1
mun-novel7-3p	elongation of very long chain fatty acids protein 1	ELOVL1
mun-novel72-5p	elongation of very long chain fatty acids protein 1	ELOVL1
mun-miR-2954-3p	elongator complex protein 3	ELP3
mun-miR-203-5p	ER membrane protein complex subunit 6	EMC1
mun-novel102-3p	ER membrane protein complex subunit 8	EMC1
mun-novel46-3p	ER membrane protein complex subunit 1	EMC1
mun-novel68-3p	glutamyl aminopeptidase	ENPEP
mun-novel8-3p	ectonucleotide pyrophosphatase/phosphodiesterase family member 2	ENPP2
mun-novel8-3p	E1A-binding protein p400	EP400
mun-novel24-5p	band 4.1-like protein 2	EPB41L2
mun-novel45-3p	band 4.1-like protein 2	EPB41L2
mun-miR-2954-3p	enhancer of polycomb 1	EPC1
mun-novel36-3p	enhancer of polycomb 1	EPC1
mun-miR-194-5p	ephrin type-A receptor 5	EPHA5
mun-novel102-3p	ephrin type-A receptor 5	EPHA5
mun-novel46-3p	ephrin type-A receptor 5	EPHA5
mun-novel7-3p	ephrin type-A receptor 5	EPHA5
mun-novel72-3p	ephrin type-A receptor 5	EPHA5
mun-novel8-3p	ephrin type-A receptor 5	EPHA5
mun-novel7-3p	ephrin type-B receptor 1	EPHB1
mun-novel36-3p	epidermal growth factor receptor substrate 15	EPS15
mun-miR-215-5p	proepiregulin	EREG
mun-novel29-3p	endoplasmic reticulum-Golgi intermediate compartment protein 1	ERGIC1
mun-miR-194-5p	protein ERGIC-53	ERGIC53
mun-novel10-3p	ERI1 exoribonuclease 3	ERI3
mun-novel15-3p	ERI1 exoribonuclease 3	ERI3
mun-novel72-3p	ERBB receptor feedback inhibitor 1	ERRFI1
mun-novel45-3p	estrogen-related receptor gamma	ESRRG
mun-novel46-3p	estrogen-related receptor gamma	ESRRG
mun-novel72-3p	estrogen-related receptor gamma	ESRRG
mun-novel102-3p	eukaryotic peptide chain release factor subunit 1	ETF1
mun-novel36-3p	eukaryotic peptide chain release factor subunit 1	ETF1
mun-novel66-3p	eukaryotic peptide chain release factor subunit 1	ETF1
mun-novel72-3p	eukaryotic peptide chain release factor subunit 1	ETF1
mun-novel8-3p	eukaryotic peptide chain release factor subunit 1	ETF1
mun-novel8-3p	protein C-ets-2	ETS2
mun-novel66-3p	transcription factor ETV6	ETV6
mun-novel102-3p	exocyst complex component 1	EXOC1
mun-novel29-3p	exocyst complex component 1	EXOC1
mun-novel72-3p	exocyst complex component 1	EXOC1
mun-novel8-3p	exocyst complex component 7	EXOC7
mun-novel102-3p	exosome complex component RRP45	EXOSC9
mun-novel10-3p	exostosin-1	EXT1
mun-novel15-3p	exostosin-1	EXT1
mun-novel7-3p	exostosin-1	EXT1
mun-novel72-3p	histone-lysine N-methyltransferase EZH2	EZH2
mun-novel72-3p	FAS-associated factor 1	FAF1
mun-novel8-3p	FAS-associated factor 1	FAF1
mun-novel68-3p	FAS-associated factor 2	FAF2
mun-novel8-3p	FAS-associated factor 2	FAF2
mun-novel102-3p	protein FAM107B	FAM107B
mun-miR-194-5p	protein FAM110B	FAM110B
mun-novel72-5p	protein FAM131B	FAM131B
mun-novel68-3p	protein FAM132A	FAM132A
mun-miR-194-5p	membrane protein FAM159A	FAM159A
mun-novel72-5p	membrane protein FAM159A	FAM159A
mun-novel102-3p	protein FAM171A1	FAM171A1
mun-novel66-3p	protein FAM173B	FAM173B
mun-novel66-3p	protein FAM19A1	FAM19A1
mun-miR-194-5p	protein FAM19A2	FAM19A2
mun-novel45-3p	protein FAM19A2	FAM19A2
mun-novel7-3p	protein FAM19A2	FAM19A2
mun-novel72-3p	protein FAM207A	FAM207A
mun-novel102-3p	protein FAM20A	FAM20A
mun-novel7-3p	glycosaminoglycan xylosylkinase	FAM20B
mun-novel102-3p	protein FAM53A	FAM53A
mun-novel45-3p	seprase	FAP
mun-novel7-3p	phenylalanine--tRNA ligase beta subunit	FARSB
mun-novel8-3p	protocadherin Fat 1	FAT1
mun-novel31-3p	protocadherin Fat 2	FAT2
mun-novel68-3p	fibulin-5	FBLN5
mun-novel7-3p	fibulin-5	FBLN5
mun-novel72-5p	fibulin-5	FBLN5
mun-miR-203-5p	fibrillin-2	FBN2
mun-novel72-5p	F-box/LRR-repeat protein 14	FBXL14
mun-novel46-3p	F-box/LRR-repeat protein 2	FBXL2
mun-novel29-3p	F-box only protein 25	FBXO25
mun-novel68-3p	F-box/SPRY domain-containing protein 1	FBXO45
mun-novel72-3p	F-box/SPRY domain-containing protein 1	FBXO45
mun-novel102-3p	F-box only protein 7	FBXO7
mun-novel8-3p	F-box only protein 8	FBXO8
mun-novel45-3p	F-box/WD repeat-containing protein 11	FBXW11
mun-novel72-3p	F-box/WD repeat-containing protein 11	FBXW11
mun-novel72-3p	protein fem-1 A	FEM1A
mun-novel72-5p	protein fem-1 A	FEM1A
mun-miR-194-5p	protein fem-1 C	FEM1C
mun-novel7-3p	protein fem-1 C	FEM1C
mun-novel45-3p	protein FEV	FEV
mun-novel68-3p	fez family zinc finger protein 2	FEZF2
mun-miR-215-5p	fibroblast growth factor 13	FGF13
mun-novel8-3p	fibroblast growth factor 14	FGF14
mun-miR-2954-3p	fibroblast growth factor 16	FGF16
mun-novel72-5p	fibroblast growth factor 9	FGF9
mun-miR-2954-3p	FH1/FH2 domain-containing protein 1	FHOD1
mun-novel72-5p	FH1/FH2 domain-containing protein 1	FHOD1
mun-miR-215-5p	polyphosphoinositide phosphatase	FIG4
mun-novel36-3p	fidgetin	FIGN
mun-novel7-3p	filensin	FIGN
mun-novel31-3p	peptidyl-prolyl cis-trans isomerase FKBP1B	FKBP1B
mun-novel7-3p	peptidyl-prolyl cis-trans isomerase FKBP4	FKBP4
mun-novel72-3p	peptidyl-prolyl cis-trans isomerase FKBP4	FKBP4
mun-novel45-3p	leucine-rich repeat transmembrane protein FLRT2	FLRT2
mun-miR-2954-3p	leucine-rich repeat transmembrane protein FLRT3	FLRT3
mun-novel102-3p	fragile X mental retardation protein 1 B	FMR1
mun-novel46-3p	fragile X mental retardation protein 1 B	FMR1
mun-novel7-3p	fragile X mental retardation protein 1 B	FMR1
mun-novel72-5p	fos-related antigen 2	FOSL2
mun-novel102-3p	forkhead box protein G1	FOXG1
mun-miR-2954-3p	forkhead box protein P1	FOXP1
mun-novel102-3p	forkhead box protein P1	FOXP1
mun-novel45-3p	forkhead box protein P1	FOXP1
mun-miR-203-5p	forkhead box protein P2	FOXP2
mun-novel102-3p	forkhead box protein P2	FOXP2
mun-novel36-3p	forkhead box protein P2	FOXP2
mun-novel7-3p	forkhead box protein P2	FOXP2
mun-novel8-3p	fucose-1-phosphate guanylyltransferase	FPGT
mun-novel102-3p	follistatin-related protein 4	FSTL4
mun-miR-194-5p	putative ribosomal RNA methyltransferase 2	FTSJ2
mun-novel8-3p	FUN14 domain-containing protein 1	FUNDC1
mun-novel102-3p	tyrosine-protein kinase Fyn	FYN
mun-novel66-3p	UAP56-interacting factor	FYTTD1
mun-novel68-3p	frizzled-8	FZD8
mun-novel29-3p	ras GTPase-activating protein-binding protein 1	G3BP1
mun-novel46-3p	ras GTPase-activating protein-binding protein 1	G3BP1
mun-miR-203-5p	GRB2-associated-binding protein 1	GAB1
mun-novel66-3p	gamma-aminobutyric acid receptor subunit alpha-1	GABRA1
mun-novel24-5p	gamma-aminobutyric acid receptor subunit alpha-2	GABRA2
mun-novel7-3p	gamma-aminobutyric acid receptor subunit gamma-2	GABRG2
mun-novel8-3p	growth arrest and DNA damage-inducible protein GADD45 gamma	GADD45G
mun-novel66-3p	polypeptide N-acetylgalactosaminyltransferase 1	GALNT1
mun-novel7-3p	polypeptide N-acetylgalactosaminyltransferase 1	GALNT1
mun-novel102-3p	polypeptide N-acetylgalactosaminyltransferase 11	GALNT11
mun-miR-215-5p	polypeptide N-acetylgalactosaminyltransferase 3	GALNT3
mun-novel46-3p	N-acetylgalactosaminyltransferase 7	GALNT7
mun-novel102-3p	polypeptide N-acetylgalactosaminyltransferase-like 6	GALNTL6
mun-novel36-3p	polypeptide N-acetylgalactosaminyltransferase-like 6	GALNTL6
mun-novel72-3p	polypeptide N-acetylgalactosaminyltransferase-like 6	GALNTL6
mun-miR-194-5p	growth arrest-specific protein 7	GAS7
mun-novel72-3p	transcription factor GATA-4	GATA4
mun-novel102-3p	glutamyl-tRNA(Gln) amidotransferase subunit B, mitochondrial	GATB
mun-novel72-5p	GATS-like protein 1	GATSL1
mun-miR-194-5p	ganglioside-induced differentiation-associated protein 2	GDAP2
mun-novel7-3p	rab GDP dissociation inhibitor beta	GDI2
mun-novel102-3p	GTP-binding protein GEM	GEM
mun-novel29-3p	GTP-binding protein GEM	GEM
mun-novel8-3p	GTP-binding protein GEM	GEM
mun-novel8-3p	zinc finger protein Gfi-1b	GFI1B
mun-novel68-3p	ADP-ribosylation factor-binding protein GGA3	GGA3
mun-novel7-3p	gamma-glutamylcyclotransferase	GGCT
mun-novel72-3p	gametogenetin-binding protein 2	GGNBP2
mun-novel68-3p	geranylgeranyl pyrophosphate synthase	GGPS1
mun-novel45-3p	glucose-induced degradation protein 4	GID4
mun-novel29-3p	glucose-induced degradation protein 8	GID8
mun-novel45-3p	glucose-induced degradation protein 8	GID8
mun-novel102-3p	gap junction beta-1 protein	GJB1
mun-novel72-3p	gap junction beta-1 protein	GJB1
mun-novel72-5p	gap junction beta-7 protein	GJB7
mun-novel8-3p	gap junction beta-7 protein	GJB7
mun-novel45-3p	gap junction gamma-1 protein	GJC1
mun-novel72-3p	G kinase-anchoring protein 1	GKAP1
mun-miR-2954-3p	glucocorticoid-induced transcript 1 protein	GLCCI1
mun-novel102-3p	glucocorticoid-induced transcript 1 protein	GLCCI1
mun-novel7-3p	glucocorticoid-induced transcript 1 protein	GLCCI1
mun-novel72-3p	glucocorticoid-induced transcript 1 protein	GLCCI1
mun-miR-375-3p	lactoylglutathione lyase	GLO1
mun-novel101-3p	lactoylglutathione lyase	GLO1
mun-novel102-3p	lactoylglutathione lyase	GLO1
mun-novel45-3p	lactoylglutathione lyase	GLO1
mun-novel102-3p	glyoxalase domain-containing protein 4	GLOD4
mun-novel45-3p	glycine receptor subunit alpha-2	GLRA2L
mun-miR-194-5p	glutaminase kidney isoform, mitochondrial	GLS
mun-novel72-3p	glutamate dehydrogenase 1, mitochondrial	GLUD1
mun-novel66-3p	putative oxidoreductase GLYR1	GLYR1
mun-novel7-3p	glia maturation factor beta	GMFB
mun-miR-2954-3p	GMP synthase [glutamine-hydrolyzing]	GMPS
mun-novel66-3p	guanine nucleotide-binding protein G(k) subunit alpha	GNAI3
mun-novel36-3p	guanine nucleotide-binding protein G(olf) subunit alpha	GNAL
mun-novel72-5p	guanine nucleotide-binding protein G(z) subunit alpha	GNAZ
mun-novel68-3p	guanine nucleotide-binding protein subunit beta-4	GNB4
mun-miR-194-5p	guanine nucleotide-binding protein G(I)/G(S)/G(O) subunit gamma-10	GNG10
mun-miR-194-5p	glucosamine-6-phosphate isomerase 2	GNPDA2
mun-novel8-3p	glucosamine 6-phosphate N-acetyltransferase	GNPNAT1
mun-novel29-3p	golgin subfamily A member 7	GOLGA7
mun-novel45-3p	Golgi phosphoprotein 3	GOLPH3
mun-novel8-3p	vesicle transport protein GOT1B	GOLT1B
mun-miR-2954-3p	Golgi reassembly-stacking protein 2	GORASP2
mun-novel72-3p	aspartate aminotransferase, cytoplasmic	GOT1
mun-novel68-3p	vasculin-like protein 1	GPBP1L1
mun-novel72-5p	gephyrin	GPHN
mun-novel29-3p	glucose-6-phosphate isomerase	GPI
mun-novel46-3p	GPI mannosyltransferase 3	GPI10
mun-novel31-3p	neuronal membrane glycoprotein M6-a	GPM6A
mun-novel45-3p	neuronal membrane glycoprotein M6-b	GPM6B
mun-novel72-3p	protein GPR107	GPR107
mun-novel29-3p	probable G-protein coupled receptor 112	GPR112
mun-novel29-3p	probable G-protein coupled receptor 125	GPR125
mun-novel31-3p	probable G-protein coupled receptor 158	GPR158
mun-novel72-3p	probable G-protein coupled receptor 34	GPR34
mun-novel29-3p	probable G-protein coupled receptor 85	GPR85
mun-miR-194-5p	alanine aminotransferase 2	GPT2
mun-novel72-3p	growth factor receptor-bound protein 2	GRB2
mun-novel102-3p	gremlin-1	GREM1
mun-novel72-3p	gremlin-1	GREM1
mun-miR-203-5p	glutamate receptor 1	GRIA1
mun-novel45-3p	glutamate receptor 2	GRIA2
mun-miR-194-5p	glutamate receptor 4	GRIA4
mun-novel68-3p	glutamate receptor 4	GRIA4
mun-novel29-3p	glutamate receptor ionotropic, kainate 2	GRIK2
mun-novel45-3p	glutamate receptor ionotropic, kainate 2	GRIK2
mun-miR-2954-3p	glutamate receptor ionotropic, NMDA 1	GRIN1
mun-novel8-3p	glutamate receptor ionotropic, NMDA 1	GRIN1
mun-novel36-3p	metabotropic glutamate receptor 8	GRM8
mun-novel68-3p	gastrin-releasing peptide	GRP
mun-novel46-3p	grpE protein 1, mitochondrial	GRPEL1
mun-novel7-3p	grpE protein 1, mitochondrial	GRPEL1
mun-novel72-3p	glutathione S-transferase omega-1	GSTO1
mun-novel66-3p	glycosyltransferase-like domain-containing protein 1	GTDC1
mun-miR-2954-3p	general transcription factor IIE subunit 1	GTF2E1
mun-novel29-3p	general transcription factor 3C polypeptide 3	GTF3C3
mun-novel102-3p	putative GTP-binding protein 6	GTPBP6
mun-novel8-3p	putative GTP-binding protein 6	GTPBP6
mun-novel45-3p	heat-stable enterotoxin receptor	GUCY2C
mun-novel7-3p	glycogenin-1	GYG1
mun-novel102-3p	E3 ubiquitin-protein ligase HACE1	HACE1
mun-novel29-3p	trifunctional enzyme subunit beta, mitochondrial	HADHB
mun-novel7-3p	histidine--tRNA ligase, cytoplasmic	HARS
mun-novel66-3p	histone deacetylase 8	HDAC8
mun-novel7-3p	histone deacetylase 8	HDAC8
mun-novel29-3p	histone deacetylase 9	HDAC9
mun-miR-194-5p	HEAT repeat-containing protein 1	HEATR1
mun-novel31-3p	E3 ubiquitin-protein ligase HECTD1	HECTD1
mun-novel7-3p	probable E3 ubiquitin-protein ligase HERC4	HERC4
mun-novel101-3p	hedgehog-interacting protein	HHIP
mun-miR-194-5p	3-hydroxyisobutyrate dehydrogenase, mitochondrial	HIBADH
mun-novel45-3p	hypoxia-inducible factor 1-alpha	HIF1A
mun-novel68-3p	hypoxia-inducible factor 1-alpha	HIF1A
mun-novel46-3p	hypoxia-inducible factor 1-alpha inhibitor	HIF1AN
mun-novel7-3p	hypoxia-inducible factor 1-alpha inhibitor	HIF1AN
mun-novel72-3p	hypoxia-inducible factor 1-alpha inhibitor	HIF1AN
mun-novel102-3p	zinc finger protein 40	HIVEP1
mun-novel45-3p	homeobox-containing protein 1	HMBOX1
mun-miR-2954-3p	high mobility group protein B1	HMGB1
mun-novel72-3p	high mobility group protein B1	HMGB1
mun-novel8-3p	high mobility group protein B3	HMGB3
mun-miR-2954-3p	3-hydroxy-3-methylglutaryl-coenzyme A reductase	HMGCR
mun-novel31-3p	hematological and neurological expressed 1 protein	HN1
mun-novel72-3p	hematological and neurological expressed 1 protein	HN1
mun-novel72-5p	hepatocyte nuclear factor 1-alpha	HNF1A
mun-miR-375-3p	hepatocyte nuclear factor 4-alpha	HNF4A
mun-novel7-3p	heterogeneous nuclear ribonucleoprotein A0	HNRNPA0
mun-novel72-5p	heterogeneous nuclear ribonucleoprotein A0	HNRNPA0
mun-novel66-3p	heterogeneous nuclear ribonucleoproteins A2/B1	HNRNPA2B1
mun-novel72-3p	heterogeneous nuclear ribonucleoproteins A2/B1	HNRNPA2B1
mun-novel45-3p	heterogeneous nuclear ribonucleoprotein A3	HNRNPA3
mun-novel102-3p	heterogeneous nuclear ribonucleoprotein H	HNRNPH1
mun-novel72-3p	heterogeneous nuclear ribonucleoprotein H	HNRNPH1
mun-novel46-3p	heterogeneous nuclear ribonucleoprotein K	HNRNPK
mun-novel7-3p	heterogeneous nuclear ribonucleoprotein K	HNRNPK
mun-novel72-3p	protein Hook 1	HOOK1
mun-novel72-3p	protein Hook 3	HOOK3
mun-novel7-3p	homologous-pairing protein 2	HOP2
mun-novel68-3p	homeobox protein Hox-A3	HOXA3
mun-novel68-3p	homeobox protein Hox-A6	HOXA6
mun-novel66-3p	homeobox protein Hox-B5	HOXB5
mun-miR-194-5p	homeobox protein Hox-D10	HOXD10
mun-miR-194-5p	heterochromatin protein 1-binding protein 3	HP1BP3
mun-novel102-3p	heterochromatin protein 1-binding protein 3	HP1BP3
mun-novel72-5p	hippocalcin-like protein 1	HPCAL1
mun-novel8-3p	heparan sulfate 2-O-sulfotransferase 1	HS2ST1
mun-novel72-3p	heparan sulfate glucosamine 3-O-sulfotransferase 5	HS3ST5
mun-novel68-3p	heparan-sulfate 6-O-sulfotransferase 2	HS6ST2
mun-novel68-3p	heat shock factor protein 2	HSF2
mun-novel66-3p	stress-70 protein, mitochondrial	HSPA9
mun-novel10-3p	heat shock protein beta-7	HSPB7
mun-novel15-3p	heat shock protein beta-7	HSPB7
mun-miR-2954-3p	60 kDa heat shock protein, mitochondrial	HSPD1
mun-novel72-3p	HIV Tat-specific factor 1	HTATSF1
mun-miR-194-5p	serine protease HTRA1	HTRA1
mun-novel68-3p	voltage-gated hydrogen channel 1	HVCN1
mun-novel8-3p	islet cell autoantigen 1	ICA1
mun-novel66-3p	DNA-binding protein inhibitor ID-2	ID2
mun-novel36-3p	DNA-binding protein inhibitor ID-4	ID4
mun-novel7-3p	DNA-binding protein inhibitor ID-4	ID4
mun-miR-2954-3p	immediate early response 3-interacting protein 1	IER3IP1
mun-miR-375-3p	intermediate filament family orphan 1	IFFO1
mun-novel7-3p	intermediate filament family orphan 1	IFFO1
mun-novel45-3p	intraflagellar transport protein 52	IFT52
mun-novel8-3p	intraflagellar transport protein 74	IFT74
mun-novel68-3p	insulin-like growth factor 2 mRNA-binding protein 3	IGF2BP3
mun-novel45-3p	cation-independent mannose-6-phosphate receptor	IGF2R
mun-novel7-3p	insulin-like growth factor-binding protein 5	IGFBP5
mun-novel72-5p	immunoglobulin superfamily member 21	IGSF21
mun-novel66-3p	interleukin-18 receptor 1	IL18R1
mun-novel102-3p	inhibitor of growth protein 4	ING4
mun-novel68-3p	inhibitor of growth protein 4	ING4
mun-novel72-5p	inhibitor of growth protein 4	ING4
mun-novel31-3p	SOSS complex subunit C	INIP
mun-novel45-3p	DNA helicase INO80	INO80
mun-novel7-3p	DNA helicase INO80	INO80
mun-novel72-5p	DNA helicase INO80	INO80
mun-novel72-3p	type I inositol 1,4,5-trisphosphate 5-phosphatase	INPP5A
mun-novel45-3p	type II inositol 1,4,5-trisphosphate 5-phosphatase	INPP5B
mun-novel7-3p	phosphatidylinositol 4,5-bisphosphate 5-phosphatase A	INPP5J
mun-novel45-3p	insulin-induced gene 1 protein	INSIG1
mun-novel29-3p	integrator complex subunit 10	INTS10
mun-novel8-3p	integrator complex subunit 4	INTS4
mun-novel29-3p	ras GTPase-activating-like protein IQGAP2	IQGAP2
mun-novel66-3p	ras GTPase-activating-like protein IQGAP2	IQGAP2
mun-miR-194-5p	IQ motif and SEC7 domain-containing protein 1	IQSEC1
mun-novel29-3p	iron-responsive element-binding protein 2	IREB2
mun-novel29-3p	interferon regulatory factor 2	IRF2
mun-novel7-3p	iron-sulfur cluster assembly enzyme ISCU, mitochondrial	ISCU
mun-novel72-3p	iron-sulfur cluster assembly 1, mitochondrial	ISU1
mun-novel72-5p	integrin alpha-8	ITGA8
mun-miR-194-5p	integrin alpha-9	ITGA9
mun-novel72-5p	integrin alpha-V	ITGAV
mun-novel72-3p	integrin beta-5	ITGB5
mun-novel66-3p	integral membrane protein 2A	ITM2A
mun-novel45-3p	inositol 1,4,5-trisphosphate receptor type 1	ITPR1
mun-novel102-3p	tyrosine-protein kinase JAK2	JAK2
mun-novel72-5p	janus kinase and microtubule-interacting protein 2	JAKMIP1
mun-novel10-3p	junctional adhesion molecule C	JAM3
mun-novel15-3p	junctional adhesion molecule C	JAM3
mun-novel24-5p	juxtaposed with another zinc finger protein 1	JAZF1
mun-novel7-3p	bifunctional arginine demethylase and lysyl-hydroxylase JMJD6	JMJD6
mun-novel8-3p	jmjC domain-containing protein 7	JMJD7
mun-novel101-3p	junctophilin-1	JPH1
mun-novel102-3p	transcription factor AP-1	JUN
mun-miR-2954-3p	KN motif and ankyrin repeat domain-containing protein 1	KANK1
mun-novel66-3p	KN motif and ankyrin repeat domain-containing protein 1	KANK1
mun-novel46-3p	cysteine-rich protein 2-binding protein	KAT14
mun-novel102-3p	histone acetyltransferase KAT7	KAT7
mun-novel72-3p	histone acetyltransferase KAT7	KAT7
mun-novel72-5p	histone acetyltransferase KAT7	KAT7
mun-novel46-3p	kelch repeat and BTB domain-containing protein 11	KBTBD11
mun-novel72-3p	kelch repeat and BTB domain-containing protein 2	KBTBD2
mun-novel72-3p	voltage-gated potassium channel subunit beta-1	KCNAB1
mun-novel36-3p	potassium voltage-gated channel subfamily F member 1	KCNF1
mun-miR-375-3p	G protein-activated inward rectifier potassium channel 1	KCNJ3
mun-novel7-3p	potassium channel subfamily K member 2	KCNK2
mun-novel7-3p	potassium voltage-gated channel subfamily C member 1	KCNQ1
mun-novel8-3p	potassium voltage-gated channel subfamily C member 1	KCNQ1
mun-novel101-3p	potassium voltage-gated channel subfamily S member 2	KCNS2
mun-novel45-3p	potassium voltage-gated channel subfamily S member 2	KCNS2
mun-novel31-3p	keratinocyte-associated transmembrane protein 2	KCT2
mun-novel8-3p	keratinocyte-associated transmembrane protein 2	KCT2
mun-miR-2954-3p	BTB/POZ domain-containing protein kctd15	KCTD15
mun-novel8-3p	BTB/POZ domain-containing protein KCTD6	KCTD6
mun-novel46-3p	BTB/POZ domain-containing protein KCTD7	KCTD7
mun-novel7-3p	BTB/POZ domain-containing protein KCTD7	KCTD7
mun-novel45-3p	BTB/POZ domain-containing protein KCTD8	KCTD8
mun-novel68-3p	KDEL motif-containing protein 2	KDELC2
mun-miR-194-5p	lysine-specific demethylase 2B	KDM2B
mun-novel46-3p	lysine-specific demethylase 3B	KDM3B
mun-novel8-3p	lysine-specific demethylase 3B	KDM3B
mun-novel102-3p	lysine-specific demethylase 4B	KDM4B
mun-miR-194-5p	lysine-specific demethylase 6A	KDM6A
mun-miR-2954-3p	lysine-specific demethylase 6A	KDM6A
mun-novel102-3p	lysine-specific demethylase 6A	KDM6A
mun-novel45-3p	lysine-specific demethylase 6A	KDM6A
mun-novel7-3p	lysine-specific demethylase 7	KDM7
mun-novel102-3p	KH domain-containing, RNA-binding, signal transduction-associated protein 1	KHDRBS1
mun-novel31-3p	KH domain-containing, RNA-binding, signal transduction-associated protein 1	KHDRBS1
mun-miR-194-5p	KH domain-containing, RNA-binding, signal transduction-associated protein 2	KHDRBS2
mun-novel46-3p	KH domain-containing, RNA-binding, signal transduction-associated protein 3	KHDRBS3
mun-novel102-3p	KIAA0247	KIAA0247
mun-novel72-3p	KIAA0247	KIAA0247
mun-novel7-3p	KIAA0930	KIAA0930
mun-novel31-3p	UPF0606 protein KIAA1549	KIAA1549
mun-novel36-3p	UPF0606 protein KIAA1549	KIAA1549
mun-novel7-3p	UPF0606 protein KIAA1549	KIAA1549
mun-novel8-3p	UPF0606 protein KIAA1549	KIAA1549
mun-novel8-3p	kinase D-interacting substrate of 220 kDa	KIDINS220
mun-novel8-3p	kinesin-like protein KIF1A	KIF1A
mun-novel102-3p	kinesin-like protein KIF1B	KIF1B
mun-novel45-3p	KIF1-binding protein	KIF1BP
mun-novel102-3p	kinesin-like protein KIF26A	KIF26A
mun-novel72-3p	kinesin-like protein KIF26A	KIF26A
mun-novel8-3p	kinesin-like protein KIF26B	KIF26B
mun-novel7-3p	kinesin-like protein KIF3B	KIF3B
mun-novel72-5p	kinesin-like protein KIF3B	KIF3B
mun-novel102-3p	kinesin heavy chain isoform 5C	KIF5C
mun-novel45-3p	kinesin-associated protein 3	KIFAP3
mun-miR-194-5p	mast/stem cell growth factor receptor Kit	KIT
mun-miR-2954-3p	kit ligand	KITLG
mun-novel72-3p	kit ligand	KITLG
mun-miR-2954-3p	Krueppel-like factor 3	KLF3
mun-novel66-3p	Krueppel-like factor 6	KLF6
mun-novel46-3p	kelch domain-containing protein 2	KLHDC2
mun-novel46-3p	kelch-like protein 13	KLHL13
mun-novel7-3p	kelch-like protein 13	KLHL13
mun-novel36-3p	kelch-like protein 14	KLHL14
mun-novel45-3p	kelch-like protein 29	KLHL29
mun-novel45-3p	kelch-like protein 3	KLHL3
mun-novel7-3p	kinetochore-associated protein 1	KNTC1
mun-novel102-3p	importin subunit alpha-4	KPNA3
mun-novel72-3p	importin subunit alpha-4	KPNA3
mun-novel36-3p	KRR1 small subunit processome component	KRR1
mun-miR-194-5p	lysosome-associated membrane glycoprotein 1	LAMP1
mun-novel46-3p	lysosome-associated membrane glycoprotein 1	LAMP1
mun-novel68-3p	ragulator complex protein LAMTOR3	LAMTOR3
mun-novel7-3p	ragulator complex protein LAMTOR3	LAMTOR3
mun-novel72-3p	lanC-like protein 2	LANCL2
mun-miR-2954-3p	protein LAP2	LAP2
mun-novel45-3p	protein LAP2	LAP2
mun-novel29-3p	lysosomal-associated transmembrane protein 4A	LAPTM4A
mun-miR-194-5p	glycosyltransferase-like protein LARGE1	LARGE1
mun-novel102-3p	glycosyltransferase-like protein LARGE1	LARGE1
mun-novel29-3p	la-related protein 4B	LARP4B
mun-novel7-3p	la-related protein 4B	LARP4B
mun-novel46-3p	la-related protein 7	LARP7
mun-novel7-3p	probable leucine--tRNA ligase, mitochondrial	LARS2
mun-novel72-3p	serine/threonine-protein kinase LATS2	LATS2
mun-novel102-3p	ligand-dependent corepressor	LCOR
mun-novel68-3p	ligand-dependent corepressor	LCOR
mun-novel68-3p	galectin-related protein	LGALSL
mun-novel8-3p	galectin-related protein	LGALSL
mun-novel68-3p	lipoma HMGIC fusion partner	LHFP
mun-novel45-3p	LIM/homeobox protein Lhx6	LHX6
mun-novel72-3p	LIM/homeobox protein Lhx9	LHX9
mun-novel8-3p	LIM/homeobox protein Lhx9	LHX9
mun-novel36-3p	protein lin-28 B	LIN28B
mun-novel45-3p	protein lin-7 A	LIN7A
mun-novel72-3p	protein lin-7 A	LIN7A
mun-miR-2954-3p	protein lin-7 C	LIN7C
mun-novel68-3p	leucine-rich repeat and immunoglobulin-like domain-containing nogo receptor-interacting protein 1	LINGO1
mun-novel72-3p	leucine-rich repeat and immunoglobulin-like domain-containing nogo receptor-interacting protein 1	LINGO1
mun-miR-2954-3p	leucine-rich repeat and immunoglobulin-like domain-containing nogo receptor-interacting protein 2	LINGO2
mun-novel66-3p	lissencephaly-1	LIS1
mun-novel72-5p	rhombotin-2	LMO2
mun-novel72-5p	E3 ubiquitin-protein ligase LNX	LNX
mun-novel7-3p	ligand of Numb protein X 2	LNX2
mun-miR-2954-3p	LON peptidase N-terminal domain and RING finger protein 1	LONRF1
mun-miR-2954-3p	lysophosphatidylcholine acyltransferase 1	LPCAT1
mun-novel10-3p	lysophospholipid acyltransferase 5	LPCAT3
mun-novel15-3p	lysophospholipid acyltransferase 5	LPCAT3
mun-novel72-5p	lysophospholipid acyltransferase 5	LPCAT3
mun-novel72-3p	phosphatidate phosphatase LPIN2	LPIN2
mun-miR-375-3p	leucine-rich repeat and transmembrane domain-containing protein 2	LRIT2
mun-novel7-3p	leucine-rich repeat and transmembrane domain-containing protein 2	LRIT2
mun-miR-194-5p	low-density lipoprotein receptor-related protein 12	LRP12
mun-novel31-3p	low-density lipoprotein receptor-related protein 12	LRP12
mun-novel29-3p	low-density lipoprotein receptor-related protein 8	LRP8
mun-novel72-3p	leucine-rich PPR motif-containing protein, mitochondrial	LRPPRC
mun-novel102-3p	leucine-rich repeat transmembrane neuronal protein 1	LRRTM1
mun-novel7-3p	leucine-rich repeat transmembrane neuronal protein 1	LRRTM1
mun-novel72-3p	leucine-rich repeat transmembrane neuronal protein 1	LRRTM1
mun-novel46-3p	leucine-rich repeat transmembrane neuronal protein 2	LRRTM2
mun-novel68-3p	protein LSM14 A	LSM14A
mun-novel72-3p	U6 snRNA-associated Sm-like protein LSm5	LSM5
mun-novel29-3p	U6 snRNA-associated Sm-like protein LSm7	LSM7
mun-novel8-3p	U6 snRNA-associated Sm-like protein LSm7	LSM7
mun-novel8-3p	leukotriene A-4 hydrolase	LTA4H
mun-novel68-3p	leucine zipper protein 2	LUZP2
mun-miR-375-3p	LYR motif-containing protein 2	LYRM2
mun-novel45-3p	LYR motif-containing protein 2	LYRM2
mun-novel102-3p	LYR motif-containing protein 4	LYRM4
mun-novel29-3p	complex III assembly factor LYRM7	LYRM7
mun-novel102-3p	lysM and putative peptidoglycan-binding domain-containing protein 2	LYSMD2
mun-novel72-3p	lysM and putative peptidoglycan-binding domain-containing protein 2	LYSMD2
mun-novel7-3p	leucine zipper transcription factor-like protein 1	LZTFL1
mun-novel66-3p	O-acetyl-ADP-ribose deacetylase MACROD2	MACROD2
mun-novel72-5p	mitotic spindle assembly checkpoint protein MAD2B	MAD2L2
mun-novel102-3p	membrane-associated guanylate kinase, WW and PDZ domain-containing protein 3	MAGI3
mun-novel8-3p	magnesium transporter protein 1	MAGT1
mun-novel72-3p	mastermind-like protein 1	MAML1
mun-novel72-5p	mastermind-like protein 1	MAML1
mun-novel45-3p	microtubule-associated proteins 1A/1B light chain 3B	MAP1LC3B
mun-novel29-3p	mitogen-activated protein kinase kinase kinase 2	MAP3K2
mun-novel72-5p	mitogen-activated protein kinase kinase kinase 2	MAP3K2
mun-novel72-5p	mitogen-activated protein kinase kinase kinase 3	MAP3K3
mun-novel31-3p	mitogen-activated protein kinase kinase kinase 5	MAP3K5
mun-novel46-3p	mitogen-activated protein kinase kinase kinase kinase 3	MAP4K3
mun-novel102-3p	mitogen-activated protein kinase kinase kinase kinase 4	MAP4K4
mun-novel36-3p	ensconsin	MAP7
mun-novel29-3p	mitogen-activated protein kinase 1	MAPK1
mun-novel46-3p	mitogen-activated protein kinase 11	MAPK11
mun-novel102-3p	mitogen-activated protein kinase 14	MAPK14
mun-novel72-3p	mitogen-activated protein kinase 14	MAPK14
mun-novel29-3p	mitogen-activated protein kinase 8	MAPK8
mun-novel72-5p	c-Jun-amino-terminal kinase-interacting protein 3	MAPK8IP3
mun-novel46-3p	c-Jun-amino-terminal kinase-interacting protein 4	MAPK8IP4
mun-novel8-3p	c-Jun-amino-terminal kinase-interacting protein 4	MAPK8IP4
mun-miR-194-5p	target of rapamycin complex 2 subunit MAPKAP1	MAPKAP1
mun-novel72-3p	target of rapamycin complex 2 subunit MAPKAP1	MAPKAP1
mun-novel29-3p	microtubule-associated protein RP/EB family member 1	MAPRE1
mun-novel7-3p	microtubule-associated protein RP/EB family member 2	MAPRE2
mun-novel46-3p	E3 ubiquitin-protein ligase MARCH11	MARCH11
mun-novel10-3p	E3 ubiquitin-protein ligase MARCH5	MARCH5
mun-novel15-3p	E3 ubiquitin-protein ligase MARCH5	MARCH5
mun-novel29-3p	E3 ubiquitin-protein ligase MARCH5	MARCH5
mun-miR-2954-3p	E3 ubiquitin-protein ligase MARCH7	MARCH7
mun-novel102-3p	serine/threonine-protein kinase MARK1	MARK1
mun-novel72-5p	mannan-binding lectin serine protease 1	MASP1
mun-miR-194-5p	S-adenosylmethionine synthase isoform type-1	MAT1A
mun-novel68-3p	matrilin-4	MATN4
mun-novel31-3p	muscleblind-like protein 1	MBNL1
mun-novel46-3p	muscleblind-like protein 1	MBNL1
mun-miR-194-5p	muscleblind-like protein 2	MBNL2
mun-novel45-3p	muscleblind-like protein 2	MBNL2
mun-novel102-3p	myelin basic protein	MBP
mun-novel36-3p	myelin basic protein	MBP
mun-novel46-3p	myelin basic protein	MBP
mun-novel8-3p	myelin basic protein	MBP
mun-novel7-3p	membrane-bound transcription factor site-1 protease	MBTPS1
mun-miR-2954-3p	colorectal mutant cancer protein	MCC
mun-novel102-3p	methylcrotonoyl-CoA carboxylase beta chain, mitochondrial	MCCC2
mun-novel68-3p	monocarboxylate transporter 1	MCT1
mun-novel29-3p	monocarboxylate transporter 4	MCT4
mun-novel72-5p	monocarboxylate transporter 4	MCT4
mun-novel7-3p	mitochondrial calcium uniporter regulator 1	MCUR1
mun-novel7-3p	MAM domain-containing glycosylphosphatidylinositol anchor protein 1	MDGA1
mun-novel102-3p	MAM domain-containing glycosylphosphatidylinositol anchor protein 2	MDGA2
mun-novel68-3p	MAM domain-containing glycosylphosphatidylinositol anchor protein 2	MDGA2
mun-novel72-3p	MAM domain-containing glycosylphosphatidylinositol anchor protein 2	MDGA2
mun-novel8-3p	MAM domain-containing glycosylphosphatidylinositol anchor protein 2	MDGA2
mun-novel72-5p	chromatin modification-related protein MEAF6	MEAF6
mun-novel68-3p	mediator of RNA polymerase II transcription subunit 1	MED1
mun-novel29-3p	mediator of RNA polymerase II transcription subunit 12	MED12
mun-miR-2954-3p	mediator of RNA polymerase II transcription subunit 13	MED13
mun-novel45-3p	mediator of RNA polymerase II transcription subunit 13	MED13
mun-novel8-3p	mediator of RNA polymerase II transcription subunit 20	MED20
mun-miR-194-5p	mediator of RNA polymerase II transcription subunit 23	MED23
mun-novel102-3p	mediator of RNA polymerase II transcription subunit 31	MED31
mun-novel7-3p	mediator of RNA polymerase II transcription subunit 31	MED31
mun-novel68-3p	mediator of RNA polymerase II transcription subunit 8	MED8
mun-novel72-3p	mediator of RNA polymerase II transcription subunit 8	MED8
mun-novel66-3p	mediator of RNA polymerase II transcription subunit 9	MED9
mun-miR-194-5p	homeobox protein Meis2	MEIS2
mun-novel31-3p	homeobox protein Meis2	MEIS2
mun-novel46-3p	homeobox protein Meis2	MEIS2
mun-novel8-3p	homeobox protein Meis2	MEIS2
mun-novel72-5p	homeobox protein MOX-2	MEOX2
mun-novel45-3p	methionine aminopeptidase 1	METAP1
mun-novel72-3p	microfibrillar-associated protein 5	MFAP5
mun-novel102-3p	mitofusin-2	MFN2
mun-novel68-3p	mitofusin-2	MFN2
mun-miR-194-5p	hippocampus abundant transcript 1 protein	MFSD14A
mun-novel72-5p	E3 ubiquitin-protein ligase MIB2	MIB2
mun-novel46-3p	protein-methionine sulfoxide oxidase MICAL3	MICAL3
mun-novel68-3p	protein-methionine sulfoxide oxidase MICAL3	MICAL3
mun-novel8-3p	protein-methionine sulfoxide oxidase MICAL3	MICAL3
mun-novel7-3p	MICAL-like protein 1	MICALL1
mun-novel66-3p	calcium uptake protein 3, mitochondrial	MICU3
mun-novel29-3p	mirror-image polydactyly gene 1 protein	MIPOL1
mun-novel68-3p	mirror-image polydactyly gene 1 protein	MIPOL1
mun-novel72-3p	mirror-image polydactyly gene 1 protein	MIPOL1
mun-novel8-3p	muskelin	MKLN1
mun-miR-2954-3p	E3 ubiquitin-protein ligase makorin-1	MKRN1
mun-novel29-3p	E3 ubiquitin-protein ligase makorin-1	MKRN1
mun-novel72-3p	E3 ubiquitin-protein ligase makorin-1	MKRN1
mun-novel68-3p	malectin	MLEC
mun-novel7-3p	malectin	MLEC
mun-novel72-5p	malectin	MLEC
mun-novel72-5p	myeloid leukemia factor 2	MLF2
mun-novel31-3p	histone-lysine N-methyltransferase MLL	MLL
mun-miR-194-5p	histone-lysine N-methyltransferase MLL3	MLL3
mun-novel102-3p	MLX-interacting protein	MLXIP
mun-novel29-3p	MLX-interacting protein	MLXIP
mun-novel31-3p	collagenase 3	MMP13
mun-novel8-3p	collagenase 3	MMP13
mun-novel102-3p	matrix metalloproteinase-16	MMP16
mun-novel7-3p	matrix metalloproteinase-16	MMP16
mun-novel7-3p	max-binding protein MNT	MNT
mun-novel31-3p	MOB kinase activator 1A	MOB1A
mun-novel7-3p	55 kDa erythrocyte membrane protein	MPP1
mun-novel29-3p	MAGUK p55 subfamily member 6	MPP6
mun-novel72-5p	MAGUK p55 subfamily member 6	MPP6
mun-miR-194-5p	metallophosphoesterase domain-containing protein 1	MPPED1
mun-novel46-3p	39S ribosomal protein L15, mitochondrial	MRPL15
mun-novel29-3p	39S ribosomal protein L32, mitochondrial	MRPL32
mun-novel46-3p	39S ribosomal protein L32, mitochondrial	MRPL32
mun-novel68-3p	39S ribosomal protein L46, mitochondrial	MRPL46
mun-novel7-3p	ribosomal protein 63, mitochondrial	MRPL63
mun-novel31-3p	methionine-R-sulfoxide reductase B3, mitochondrial	MSRB3
mun-novel29-3p	metal regulatory transcription factor 1	MTF1
mun-novel45-3p	myotubularin-related protein 2	MTMR2
mun-novel7-3p	myotubularin-related protein 2	MTMR2
mun-novel45-3p	methionine synthase reductase	MTRR
mun-miR-2954-3p	microtubule-associated tumor suppressor candidate 2	MTUS2
mun-novel8-3p	max dimerization protein 4	MXD4
mun-novel7-3p	max-interacting protein 1	MXI1
mun-novel66-3p	matrix-remodeling-associated protein 5	MXRA5
mun-novel7-3p	transcriptional activator Myb	MYB
mun-miR-2954-3p	probable E3 ubiquitin-protein ligase MYCBP2	MYCBP2
mun-novel72-3p	myelin expression factor 2	MYEF2
mun-novel8-3p	myelin expression factor 2	MYEF2
mun-miR-194-5p	myosin-11	MYO10
mun-miR-215-5p	myosin-10	MYO10
mun-miR-2954-3p	unconventional myosin-X	MYO10
mun-miR-194-5p	unconventional myosin-Va	MYO5A
mun-novel8-3p	unconventional myosin-Va	MYO5A
mun-novel7-3p	unconventional myosin-VI	MYO6
mun-miR-2954-3p	myosin-9	MYO9
mun-novel72-5p	N(6)-adenine-specific DNA methyltransferase 2	N6AMT2
mun-novel66-3p	N-alpha-acetyltransferase 15, NatA auxiliary subunit	NAA15
mun-miR-2954-3p	NAD kinase domain-containing protein 1, mitochondrial	NADK1
mun-novel102-3p	nicotinamide phosphoribosyltransferase	NAMPT
mun-novel68-3p	nucleosome assembly protein 1-like 4	NAP1L4
mun-novel72-3p	nucleosome assembly protein 1-like 4	NAP1L4
mun-novel7-3p	nuclear prelamin A recognition factor	NARF
mun-novel45-3p	neuron navigator 2	NAV2
mun-novel102-3p	neuron navigator 3	NAV3
mun-novel72-3p	neuron navigator 3	NAV3
mun-novel29-3p	neurocalcin-delta	NCALD
mun-novel8-3p	neuronal cell adhesion molecule	NCAM1
mun-novel68-3p	nuclear cap-binding protein subunit 2	NCBP2
mun-novel29-3p	cytoplasmic protein NCK2	NCK2
mun-novel72-3p	cytoplasmic protein NCK2	NCK2
mun-novel24-5p	nicalin	NCLN
mun-miR-2954-3p	bifunctional protein NCOAT	NCOAT
mun-novel45-3p	bifunctional protein NCOAT	NCOAT
mun-novel66-3p	bifunctional protein NCOAT	NCOAT
mun-miR-194-5p	nuclear receptor corepressor 1	NCOR1
mun-novel45-3p	nuclear receptor corepressor 1	NCOR1
mun-novel68-3p	norrin	NDP
mun-miR-194-5p	protein NDRG1	NDRG1
mun-miR-194-5p	protein NDRG1	NDRG1
mun-novel102-3p	protein NDRG1	NDRG1
mun-novel102-3p	complex I intermediate-associated protein 30, mitochondrial	NDUFAF1
mun-novel29-3p	NADH dehydrogenase [ubiquinone] 1 beta subcomplex subunit 5, mitochondrial	NDUFB5
mun-miR-215-5p	neurofilament light polypeptide	NEFL
mun-novel68-3p	neurofilament medium polypeptide	NEFM
mun-miR-2954-3p	neuronal growth regulator 1	NEGR1
mun-novel29-3p	serine/threonine-protein kinase Nek9	NEK9
mun-novel7-3p	serine/threonine-protein kinase Nek9	NEK9
mun-novel72-3p	serine/threonine-protein kinase Nek9	NEK9
mun-novel72-5p	serine/threonine-protein kinase Nek9	NEK9
mun-novel102-3p	protein NEL-like	NELL1
mun-novel72-3p	protein NEL-like	NELL1
mun-miR-2954-3p	neurogenic differentiation factor 6	NEUROD6
mun-novel102-3p	nexilin	NEXN
mun-novel102-3p	nuclear factor 1 A-type	NFIA
mun-novel7-3p	nuclear factor 1 A-type	NFIA
mun-miR-2954-3p	nuclear factor 1 B-type	NFIB
mun-novel24-5p	nuclear factor NF-kappa-B p105 subunit	NFKB1
mun-novel72-5p	nuclear factor NF-kappa-B p105 subunit	NFKB1
mun-novel7-3p	nuclear transcription factor Y subunit alpha	NFYA
mun-novel31-3p	nuclear transcription factor Y subunit gamma	NFYC
mun-novel45-3p	nuclear transcription factor Y subunit gamma	NFYC
mun-novel72-5p	H/ACA ribonucleoprotein complex subunit 2	NHP2
mun-novel24-5p	homeobox protein Nkx-6.2	NKX6-2
mun-novel29-3p	neuroligin-1	NLGN1
mun-novel46-3p	serine/threonine-protein kinase NLK	NLK
mun-novel8-3p	nucleoside diphosphate kinase 5	NME5
mun-novel29-3p	glycylpeptide N-tetradecanoyltransferase 2	NMT2
mun-miR-203-5p	nucleolar complex protein 3	NOC3L
mun-novel72-5p	nucleotide-binding oligomerization domain-containing protein 1	NOD1
mun-miR-2954-3p	nucleolar protein 11	NOL11
mun-novel29-3p	nucleolar protein 16	NOL16
mun-novel66-3p	polynucleotide 5'-hydroxyl-kinase NOL9	NOL9
mun-novel31-3p	non-POU domain-containing octamer-binding protein	NONO
mun-novel72-5p	non-POU domain-containing octamer-binding protein	NONO
mun-novel7-3p	putative ribosomal RNA methyltransferase NOP2	NOP2
mun-novel102-3p	epididymal secretory protein E1	NPC2
mun-novel31-3p	epididymal secretory protein E1	NPC2
mun-novel72-3p	nuclear receptor subfamily 0 group B member 1	NR0B1
mun-miR-2954-3p	bile acid receptor	NR1H4
mun-novel72-5p	bile acid receptor	NR1H4
mun-novel102-3p	nuclear receptor subfamily 2 group E member 1	NR2E1
mun-novel72-5p	nuclear receptor subfamily 2 group E member 1	NR2E1
mun-novel46-3p	mineralocorticoid receptor	NR3C2
mun-miR-194-5p	nuclear receptor subfamily 4 group A member 3	NR4A3
mun-novel10-3p	nuclear receptor subfamily 4 group A member 3	NR4A3
mun-novel15-3p	nuclear receptor subfamily 4 group A member 3	NR4A3
mun-novel29-3p	nuclear receptor subfamily 4 group A member 3	NR4A3
mun-novel31-3p	nuclear receptor subfamily 4 group A member 3	NR4A3
mun-novel45-3p	nuclear receptor subfamily 4 group A member 3	NR4A3
mun-novel66-3p	nuclear receptor subfamily 4 group A member 3	NR4A3
mun-novel72-5p	nuclear receptor subfamily 4 group A member 3	NR4A3
mun-novel8-3p	nuclear receptor subfamily 5 group A member 2	NR5A2
mun-novel102-3p	nuclear receptor-binding factor 2	NRBF2
mun-novel72-3p	nuclear receptor-binding factor 2	NRBF2
mun-novel45-3p	neuropilin-1	NRP1
mun-novel29-3p	vesicle-fusing ATPase	NSF
mun-novel7-3p	vesicle-fusing ATPase	NSF
mun-novel46-3p	NMDA receptor synaptonuclear signaling and neuronal migration factor	NSMF
mun-novel8-3p	tRNA (cytosine(34)-C(5))-methyltransferase	NSUN2
mun-novel10-3p	5-methylcytosine rRNA methyltransferase NSUN4	NSUN4
mun-novel15-3p	5-methylcytosine rRNA methyltransferase NSUN4	NSUN4
mun-novel7-3p	neurotrophin-3	NTF3
mun-novel36-3p	netrin-G1	NTNG1
mun-novel7-3p	netrin-G1	NTNG1
mun-miR-194-5p	NT-3 growth factor receptor	NTRK3
mun-novel72-5p	NT-3 growth factor receptor	NTRK3
mun-novel45-3p	cytosolic Fe-S cluster assembly factor NUBP2	NUBP2
mun-novel31-3p	nuclear ubiquitous casein and cyclin-dependent kinase substrate 1	NUCKS1
mun-novel8-3p	nuclear ubiquitous casein and cyclin-dependent kinase substrate 1	NUCKS1
mun-novel7-3p	nuclear migration protein nudC	NUDC
mun-novel72-5p	nuclear migration protein nudC	NUDC
mun-novel29-3p	kinetochore protein Nuf2	NUF2
mun-novel24-5p	nuclear pore complex protein Nup155	NUP155
mun-novel68-3p	nucleoredoxin	NXN
mun-novel72-5p	neurexophilin-1	NXPH1
mun-novel102-3p	ornithine aminotransferase, mitochondrial	OAT
mun-novel7-3p	outer dense fiber protein 2	ODF2
mun-novel102-3p	2-oxoglutarate and iron-dependent oxygenase domain-containing protein 1	OGFOD1
mun-novel8-3p	2-oxoglutarate and iron-dependent oxygenase domain-containing protein 1	OGFOD1
mun-novel66-3p	opioid growth factor receptor	OGFR
mun-novel46-3p	obg-like ATPase 1	OLA1
mun-novel45-3p	noelin-3	OLFM3
mun-novel72-3p	noelin-3	OLFM3
mun-novel31-3p	oral cancer-overexpressed protein 1	ORAOV1
mun-miR-194-5p	origin recognition complex subunit 5	ORAOV5
mun-novel8-3p	origin recognition complex subunit 5	ORAOV5
mun-novel72-5p	oxysterol-binding protein-related protein 2	OSBPL2
mun-novel68-3p	oxysterol-binding protein-related protein 6	OSBPL6
mun-novel72-3p	oxidative stress-induced growth inhibitor 1	OSGIN1
mun-novel29-3p	protein odd-skipped-related 1	OSR1
mun-novel72-3p	oligosaccharyltransferase complex subunit OSTC	OSTC
mun-novel66-3p	ornithine carbamoyltransferase, mitochondrial	OTC
mun-novel8-3p	polyadenylate-binding protein 1	PABPC1
mun-novel102-3p	protein kinase C and casein kinase substrate in neurons protein 2	PACSIN2
mun-novel8-3p	multifunctional protein ADE2	PAICS
mun-miR-2954-3p	polyadenylate-binding protein-interacting protein 1	PAIP1
mun-miR-194-5p	polyadenylate-binding protein-interacting protein 2	PAIP2
mun-miR-203-5p	PAB-dependent poly(A)-specific ribonuclease subunit 3	PAN3
mun-novel24-5p	PAB-dependent poly(A)-specific ribonuclease subunit 3	PAN3
mun-novel7-3p	PAB-dependent poly(A)-specific ribonuclease subunit 3	PAN3
mun-novel72-5p	pappalysin-1	PAPPA
mun-novel8-3p	pappalysin-1	PAPPA
mun-miR-215-5p	bifunctional 3'-phosphoadenosine 5'-phosphosulfate synthase 2	PAPSS2
mun-novel66-3p	proteinase-activated receptor 3	PAR3
mun-miR-194-5p	partitioning defective 3	PARD3
mun-novel29-3p	partitioning defective 3	PARD3
mun-novel8-3p	partitioning defective 3	PARD3
mun-novel66-3p	inaD-like protein	PATJ
mun-novel72-5p	paired box protein Pax-7	PAX7
mun-novel8-3p	protein polybromo-1	PBRM1
mun-novel29-3p	pre-B-cell leukemia transcription factor 3	PBX3
mun-novel8-3p	pre-B-cell leukemia transcription factor 3	PBX3
mun-novel45-3p	propionyl-CoA carboxylase alpha chain, mitochondrial	PCCA
mun-novel46-3p	protocadherin-20	PCDH20
mun-novel29-3p	PCI domain-containing protein 2	PCID2
mun-novel68-3p	protein-L-isoaspartate(D-aspartate) O-methyltransferase	PCMT1
mun-novel66-3p	protein-L-isoaspartate O-methyltransferase domain-containing protein 2	PCMTD2
mun-miR-215-5p	cone cGMP-specific 3',5'-cyclic phosphodiesterase subunit alpha'	PDE6C
mun-novel45-3p	cone cGMP-specific 3',5'-cyclic phosphodiesterase subunit alpha'	PDE6C
mun-miR-203-5p	high affinity cAMP-specific 3',5'-cyclic phosphodiesterase 7A	PDE7A
mun-novel102-3p	high affinity cAMP-specific 3',5'-cyclic phosphodiesterase 7A	PDE7A
mun-novel7-3p	high affinity cAMP-specific 3',5'-cyclic phosphodiesterase 7A	PDE7A
mun-novel8-3p	cAMP-specific 3',5'-cyclic phosphodiesterase 7B	PDE7B
mun-novel29-3p	high affinity cAMP-specific and IBMX-insensitive 3',5'-cyclic phosphodiesterase 8B	PDE8B
mun-novel66-3p	high affinity cAMP-specific and IBMX-insensitive 3',5'-cyclic phosphodiesterase 8B	PDE8B
mun-novel72-5p	platelet-derived growth factor C	PDGFC
mun-novel31-3p	platelet-derived growth factor receptor alpha	PDGFRA
mun-novel45-3p	platelet-derived growth factor receptor alpha	PDGFRA
mun-novel8-3p	platelet-derived growth factor receptor-like protein	PDGFRL
mun-novel72-5p	protein disulfide-isomerase A3	PDIA3
mun-novel102-3p	protein disulfide-isomerase A4	PDIA4
mun-novel72-3p	protein disulfide-isomerase A6	PDIA6
mun-miR-194-5p	[Pyruvate dehydrogenase [acetyl-transferring]]-phosphatase 2, mitochondrial	PDP2
mun-miR-203-5p	[Pyruvate dehydrogenase [acetyl-transferring]]-phosphatase 2, mitochondrial	PDP2
mun-novel31-3p	3-phosphoinositide-dependent protein kinase 1	PDPK1
mun-miR-215-5p	sister chromatid cohesion protein PDS5 B	PDS5B
mun-novel45-3p	peroxisomal trans-2-enoyl-CoA reductase	PECR
mun-miR-2954-3p	E3 ubiquitin-protein ligase pellino 2	PELI2
mun-novel7-3p	E3 ubiquitin-protein ligase pellino 2	PELI2
mun-novel72-3p	xaa-Pro dipeptidase	PEPD
mun-novel102-3p	PERQ amino acid-rich with GYF domain-containing protein 2	PERQ2
mun-novel46-3p	PERQ amino acid-rich with GYF domain-containing protein 2	PERQ2
mun-novel7-3p	PERQ amino acid-rich with GYF domain-containing protein 2	PERQ2
mun-novel29-3p	peroxisomal membrane protein PEX16	PEX16
mun-novel72-5p	prefoldin subunit 1	PFDN1
mun-novel31-3p	prefoldin subunit 3	PFDN3
mun-novel72-3p	prefoldin subunit 3	PFDN3
mun-novel68-3p	phosphoglycerate mutase 1	PGAM1
mun-novel7-3p	phosphoglycerate mutase 1	PGAM1
mun-novel66-3p	membrane-associated progesterone receptor component 2	PGRMC2
mun-novel7-3p	membrane-associated progesterone receptor component 2	PGRMC2
mun-novel102-3p	CDP-diacylglycerol--glycerol-3-phosphate 3-phosphatidyltransferase, mitochondrial	PGS1
mun-novel72-5p	CDP-diacylglycerol--glycerol-3-phosphate 3-phosphatidyltransferase, mitochondrial	PGS1
mun-novel66-3p	phosphatase and actin regulator 3	PHACTR3
mun-novel7-3p	phosphatase and actin regulator 3	PHACTR3
mun-miR-194-5p	prohibitin-2	PHB2
mun-novel68-3p	prohibitin-2	PHB2
mun-novel102-3p	PHD finger protein 12	PHF12
mun-miR-194-5p	PHD finger protein 20	PHF20
mun-novel72-3p	PHD finger protein 20	PHF20
mun-novel45-3p	PHD finger protein 21A	PHF21A
mun-novel72-5p	phosphorylase b kinase regulatory subunit alpha, liver isoform	PHKA2
mun-miR-194-5p	pyridoxal phosphate phosphatase PHOSPHO2	PHOSPHO2
mun-novel31-3p	phytanoyl-CoA dioxygenase, peroxisomal	PHYH
mun-novel66-3p	5-phosphohydroxy-L-lysine phospho-lyase	PHYKPL
mun-novel66-3p	PTB-containing, cubilin and LRP1-interacting protein	PID1
mun-novel7-3p	phosphatidylinositol N-acetylglucosaminyltransferase subunit C	PIGC
mun-novel72-5p	GPI transamidase component PIG-T	PIGT
mun-novel102-3p	phosphatidylinositol 3-kinase regulatory subunit gamma	PIK3R3
mun-novel72-3p	phosphatidylinositol 3-kinase regulatory subunit gamma	PIK3R3
mun-novel8-3p	phosphatidylinositol 3-kinase regulatory subunit gamma	PIK3R3
mun-novel102-3p	phosphatidylinositol 4-phosphate 5-kinase type-1 beta	PIP5K1B
mun-novel7-3p	PITH domain-containing protein 1	PITHD1
mun-novel7-3p	phosphatidylinositol transfer protein beta isoform	PITPNB
mun-novel102-3p	cAMP-dependent protein kinase inhibitor alpha	PKIA
mun-novel36-3p	cAMP-dependent protein kinase inhibitor alpha	PKIA
mun-novel66-3p	cAMP-dependent protein kinase inhibitor alpha	PKIA
mun-miR-215-5p	plakophilin-4	PKP4
mun-novel8-3p	plakophilin-4	PKP4
mun-novel45-3p	phospholipase A1 member A	PLA1A
mun-miR-2954-3p	phospholipase A-2-activating protein	PLAA
mun-novel8-3p	1-phosphatidylinositol 4,5-bisphosphate phosphodiesterase beta-4	PLCB4
mun-novel102-3p	1-phosphatidylinositol 4,5-bisphosphate phosphodiesterase eta-2	PLCH2
mun-novel102-3p	pleckstriny domain-containing family A member 5	PLEKHA5
mun-novel7-3p	pleckstriny domain-containing family A member 5	PLEKHA5
mun-novel7-3p	pleckstriny domain-containing family F member 2	PLEKHF2
mun-miR-2954-3p	serine/threonine-protein kinase PLK2	PLK2
mun-novel29-3p	serine/threonine-protein kinase PLK2	PLK2
mun-novel72-5p	plasmolipin	PLLP
mun-miR-2954-3p	procollagen-lysine,2-oxoglutarate 5-dioxygenase 2	PLOD1
mun-novel45-3p	procollagen-lysine,2-oxoglutarate 5-dioxygenase 2	PLOD1
mun-novel7-3p	procollagen-lysine,2-oxoglutarate 5-dioxygenase 1	PLOD1
mun-novel8-3p	plexin-A2	PLXNA2
mun-miR-2954-3p	polyamine-modulated factor 1	PMF1
mun-novel10-3p	polyamine-modulated factor 1	PMF1
mun-novel29-3p	polyamine-modulated factor 1	PMF1
mun-novel102-3p	mitochondrial-processing peptidase subunit beta	PMPCB
mun-novel29-3p	arginine/serine-rich protein PNISR	PNISR
mun-novel68-3p	arginine/serine-rich protein PNISR	PNISR
mun-novel36-3p	pinin	PNN
mun-miR-194-5p	podocan	PODN
mun-novel45-3p	DNA polymerase alpha catalytic subunit	POLA1
mun-novel66-3p	DNA-directed RNA polymerase II subunit RPB11-a	POLR2J
mun-novel31-3p	DNA-directed RNA polymerase III subunit RPC6	POLR3F
mun-novel72-3p	DNA-directed RNA polymerase III subunit RPC6	POLR3F
mun-novel8-3p	ribonuclease P protein subunit p29	POP4
mun-novel45-3p	ribonuclease P/MRP protein subunit POP5	POP5
mun-novel102-3p	peroxisome proliferator-activated receptor gamma coactivator 1-alpha	PPARGC1A
mun-miR-2954-3p	periphilin-1	PPHLN1
mun-novel24-5p	peptidyl-prolyl cis-trans isomerase F, mitochondrial	PPIF
mun-novel68-3p	peptidyl-prolyl cis-trans isomerase-like 2	PPIL2
mun-novel7-3p	periplakin	PPL
mun-miR-194-5p	protein phosphatase 1 regulatory subunit 12A	PPP1R12A
mun-novel102-3p	protein phosphatase 1 regulatory inhibitor subunit 16B	PPP1R16B
mun-novel72-3p	protein phosphatase 1 regulatory inhibitor subunit 16B	PPP1R16B
mun-novel102-3p	neurabin-1	PPP1R9A
mun-novel31-3p	neurabin-1	PPP1R9A
mun-novel102-3p	serine/threonine-protein phosphatase 2A 55 kDa regulatory subunit B alpha isoform	PPP2R2A
mun-novel46-3p	serine/threonine-protein phosphatase 2A regulatory subunit B'' subunit beta	PPP2R3B
mun-novel68-3p	serine/threonine-protein phosphatase 2A 56 kDa regulatory subunit epsilon isoform	PPP2R5E
mun-novel45-3p	serine/threonine-protein phosphatase 2B catalytic subunit beta isoform	PPP3CB
mun-novel102-3p	serine/threonine-protein phosphatase 4 regulatory subunit 2	PPP4R2
mun-novel72-3p	serine/threonine-protein phosphatase 4 regulatory subunit 2	PPP4R2
mun-novel72-5p	PQ-loop repeat-containing protein 1	PQLC1
mun-novel31-3p	peroxiredoxin-1	PRDX1
mun-novel8-3p	peroxiredoxin-1	PRDX1
mun-miR-215-5p	peroxiredoxin-4	PRDX4
mun-miR-194-5p	peroxiredoxin-6	PRDX6
mun-novel36-3p	prolyl endopeptidase	PREP
mun-miR-194-5p	prickle-like protein 1	PRICKLE1
mun-novel45-3p	cAMP-dependent protein kinase catalytic subunit beta	PRKACB
mun-novel72-5p	cAMP-dependent protein kinase type I-beta regulatory subunit	PRKAR1B
mun-novel72-5p	protein kinase C beta type	PRKCB
mun-novel72-5p	protein kinase C eta type	PRKCH
mun-miR-194-5p	serine/threonine-protein kinase D1	PRKD1
mun-novel102-3p	prospero homeobox protein 1	PROX1
mun-novel45-3p	pre-mRNA-splicing factor 38B	PRPF38B
mun-novel102-3p	pre-mRNA-processing-splicing factor 8	PRPF8
mun-novel72-5p	ribose-phosphate pyrophosphokinase 1	PRPS1
mun-novel102-3p	ribose-phosphate pyrophosphokinase 2	PRPS2
mun-novel66-3p	phosphoribosyl pyrophosphate synthase-associated protein 1	PRPSAP1
mun-miR-215-5p	proline-rich protein 5	PRR5
mun-miR-2954-3p	serine protease 23	PRSS23
mun-novel8-3p	protogenin	PRTG
mun-novel68-3p	proteasome subunit beta type-2	PSMB2
mun-miR-194-5p	26S protease regulatory subunit 4	PSMC1
mun-novel29-3p	26S protease regulatory subunit 6A	PSMC3
mun-novel29-3p	26S proteasome non-ATPase regulatory subunit 10	PSMD10
mun-novel45-3p	26S proteasome non-ATPase regulatory subunit 12	PSMD12
mun-novel101-3p	proteasome activator complex subunit 3	PSME3
mun-novel29-3p	polypyrimidine tract-binding protein 2	PTBP2
mun-novel8-3p	prostaglandin E2 receptor EP3 subtype	PTGER3
mun-novel72-3p	prostaglandin E synthase 3-like	PTGES3L
mun-novel66-3p	protein tyrosine phosphatase type IVA 2	PTP4A2
mun-novel72-5p	serine/threonine-protein phosphatase 2A activator	PTPA
mun-novel45-3p	tyrosine-protein phosphatase non-receptor type 1	PTPN1
mun-novel72-5p	tyrosine-protein phosphatase non-receptor type 1	PTPN1
mun-miR-194-5p	tyrosine-protein phosphatase non-receptor type 4	PTPN4
mun-miR-375-3p	tyrosine-protein phosphatase non-receptor type 4	PTPN4
mun-miR-2954-3p	receptor-type tyrosine-protein phosphatase delta	PTPRD
mun-miR-2954-3p	receptor-type tyrosine-protein phosphatase F	PTPRF
mun-novel36-3p	receptor-type tyrosine-protein phosphatase F	PTPRF
mun-novel66-3p	receptor-type tyrosine-protein phosphatase F	PTPRF
mun-novel72-3p	receptor-type tyrosine-protein phosphatase F	PTPRF
mun-novel72-5p	receptor-type tyrosine-protein phosphatase F	PTPRF
mun-novel8-3p	receptor-type tyrosine-protein phosphatase F	PTPRF
mun-novel72-3p	receptor-type tyrosine-protein phosphatase kappa	PTPRK
mun-novel45-3p	receptor-type tyrosine-protein phosphatase mu	PTPRM
mun-novel102-3p	receptor-type tyrosine-protein phosphatase S	PTPRS
mun-novel72-3p	receptor-type tyrosine-protein phosphatase S	PTPRS
mun-novel72-5p	putative peptidyl-tRNA hydrolase PTRHD1	PTRHD1
mun-novel45-3p	6-pyruvoyl tetrahydrobiopterin synthase	PTS
mun-novel66-3p	pumilio 1	PUM1
mun-novel8-3p	pumilio 1	PUM1
mun-novel7-3p	periodic tryptophan protein 1	PWP1
mun-novel45-3p	PX domain-containing protein 1	PXDC1
mun-novel31-3p	paxillin	PXN
mun-novel66-3p	paxillin	PXN
mun-novel68-3p	paxillin	PXN
mun-novel102-3p	glutamine-rich protein 1	QRICH1
mun-novel72-3p	glutamine-rich protein 1	QRICH1
mun-miR-2954-3p	glutamyl-tRNA(Gln) amidotransferase subunit A, mitochondrial	QRSL1
mun-novel7-3p	R3H domain-containing protein 2	R3HDM2
mun-novel66-3p	ras-related protein Rab-12	RAB12
mun-novel7-3p	ras-related protein Rab-12	RAB12
mun-novel72-3p	ras-related protein Rab-18	RAB18
mun-novel29-3p	ras-related protein Rab-1A	RAB1A
mun-novel7-3p	ras-related protein Rab-21	RAB21
mun-novel31-3p	ras-related protein Rab-22A	RAB22A
mun-novel8-3p	ras-related protein Rab-28	RAB28
mun-novel45-3p	ras-related protein Rab-35	RAB35
mun-novel72-3p	ras-related protein Rab-39A	RAB39A
mun-novel102-3p	guanine nucleotide exchange factor for Rab-3A	RAB3IL1
mun-novel8-3p	guanine nucleotide exchange factor for Rab-3A	RAB3IL1
mun-miR-203-5p	ras-related protein Rab-4A	RAB4A
mun-novel102-3p	ras-related protein Rab-5A	RAB5A
mun-novel46-3p	ras-related protein Rab-5C	RAB5C
mun-miR-194-5p	ras-related protein Rab-8B	RAB8B
mun-novel29-3p	ras-related protein Rab-8B	RAB8B
mun-miR-215-5p	rab GTPase-activating protein 1	RABGAP1
mun-miR-2954-3p	rab GTPase-activating protein 1	RABGAP1
mun-novel66-3p	geranylgeranyl transferase type-2 subunit beta	RABGGTB
mun-novel31-3p	ras-related C3 botulinum toxin substrate 3	RAC3
mun-novel72-5p	ras-related C3 botulinum toxin substrate 3	RAC3
mun-miR-203-5p	GTP-binding protein RAD	RAD
mun-miR-2954-3p	GTP-binding protein RAD	RAD
mun-novel46-3p	cell cycle checkpoint protein RAD1	RAD1
mun-novel36-3p	double-strand-break repair protein rad21	RAD21
mun-novel29-3p	RAF proto-oncogene serine/threonine-protein kinase	RAF1
mun-novel72-5p	RAF proto-oncogene serine/threonine-protein kinase	RAF1
mun-miR-194-5p	ras-related protein Ral-A	RALA
mun-novel10-3p	ras-related protein Ral-A	RALA
mun-novel15-3p	ras-related protein Ral-A	RALA
mun-novel31-3p	ras-related protein Ral-A	RALA
mun-novel46-3p	ras-related protein Ral-A	RALA
mun-novel68-3p	ral GTPase-activating protein subunit alpha-1	RALGAPA1
mun-novel7-3p	ral GTPase-activating protein subunit alpha-1	RALGAPA1
mun-novel45-3p	RNA-binding Raly-like protein	RALYL
mun-novel46-3p	RNA-binding Raly-like protein	RALYL
mun-novel8-3p	ran-binding protein 9	RANBP9
mun-novel102-3p	ras-related protein Rap-2c	RAP2C
mun-novel7-3p	ras-related protein Rap-2c	RAP2C
mun-novel72-3p	ras-related protein Rap-2c	RAP2C
mun-miR-194-5p	rap guanine nucleotide exchange factor 2	RAPGEF2
mun-novel10-3p	rap guanine nucleotide exchange factor 2	RAPGEF2
mun-novel15-3p	rap guanine nucleotide exchange factor 2	RAPGEF2
mun-novel45-3p	rap guanine nucleotide exchange factor 2	RAPGEF2
mun-novel66-3p	rap guanine nucleotide exchange factor 2	RAPGEF2
mun-novel7-3p	rap guanine nucleotide exchange factor 2	RAPGEF2
mun-novel8-3p	rap guanine nucleotide exchange factor 2	RAPGEF2
mun-novel45-3p	probable arginine--tRNA ligase, mitochondrial	RARS2
mun-novel45-3p	ras guanyl-releasing protein 3	RASGRP3
mun-novel68-3p	RB1-inducible coiled-coil protein 1	RB1CC1
mun-novel68-3p	RNA binding protein fox-1 1	RBFOX1
mun-novel45-3p	RNA-binding protein 12	RBM12
mun-novel66-3p	RNA-binding protein 12	RBM12
mun-novel8-3p	RNA-binding protein 12	RBM12
mun-novel72-5p	probable RNA-binding protein 18	RBM18
mun-novel8-3p	probable RNA-binding protein 18	RBM18
mun-miR-375-3p	RNA-binding protein 24	RBM24
mun-novel45-3p	RNA-binding protein 25	RBM25
mun-novel8-3p	RNA-binding protein 38	RBM28
mun-miR-203-5p	RNA-binding protein 39	RBM39
mun-novel31-3p	RNA-binding protein 39	RBM39
mun-novel102-3p	reticulocalbin-2	RCN2
mun-novel72-3p	reticulocalbin-2	RCN2
mun-miR-2954-3p	REST corepressor 1	RCOR1
mun-novel29-3p	retinol dehydrogenase 10	RDH10
mun-novel72-3p	retinol dehydrogenase 12	RDH12
mun-novel102-3p	reelin	RELN
mun-novel102-3p	protein RER1	RER1
mun-novel7-3p	oligoribonuclease, mitochondrial	REXO2
mun-novel29-3p	replication factor C subunit 1	RFC1
mun-novel31-3p	transcription factor RFX4	RFX4
mun-novel29-3p	DNA-binding protein RFX7	RFX7
mun-novel29-3p	DNA-binding protein RFXANK	RFXANK
mun-novel72-5p	DNA-binding protein RFXANK	RFXANK
mun-miR-194-5p	regulatory factor X-associated protein	RFXAP
mun-novel29-3p	regulatory factor X-associated protein	RFXAP
mun-novel10-3p	RPE-retinal G protein-coupled receptor	RGR
mun-novel15-3p	RPE-retinal G protein-coupled receptor	RGR
mun-novel72-3p	regulator of G-protein signaling 10	RGS10
mun-novel8-3p	regulator of G-protein signaling 10	RGS10
mun-novel7-3p	regulator of G-protein signaling 5	RGS5
mun-novel7-3p	regulator of G-protein signaling 7	RGS7
mun-novel102-3p	GTP-binding protein Rheb	RHEB
mun-novel66-3p	GTP-binding protein Rhes	RHEB
mun-novel7-3p	transforming protein RhoA	RHOA
mun-novel72-3p	rho-related BTB domain-containing protein 1	RHOBTB1
mun-novel72-5p	rho-related BTB domain-containing protein 1	RHOBTB1
mun-novel10-3p	rho-related GTP-binding protein RhoC	RHOC
mun-novel15-3p	rho-related GTP-binding protein RhoC	RHOC
mun-novel7-3p	rho-related GTP-binding protein RhoC	RHOC
mun-miR-2954-3p	rapamycin-insensitive companion of mTOR	RICTOR
mun-novel102-3p	regulating synaptic membrane exocytosis protein 4	RIMS4
mun-novel102-3p	E3 ubiquitin-protein ligase RING2	RING2
mun-novel45-3p	E3 ubiquitin-protein ligase RING2	RING2
mun-novel72-3p	E3 ubiquitin-protein ligase RING2	RING2
mun-novel8-3p	E3 ubiquitin-protein ligase RNF103	RNF103
mun-novel102-3p	E3 ubiquitin-protein ligase Arkadia	RNF111
mun-miR-2954-3p	RING finger protein 126	RNF126
mun-novel72-5p	RING finger protein 126	RNF126
mun-novel8-3p	RING finger protein 126	RNF126
mun-novel36-3p	E3 ubiquitin-protein ligase RNF149	RNF149
mun-novel24-5p	E3 ubiquitin-protein ligase RNF185	RNF185
mun-novel7-3p	E3 ubiquitin-protein ligase RNF185	RNF185
mun-novel72-3p	E3 ubiquitin-protein ligase RNF185	RNF185
mun-novel72-3p	E3 ubiquitin-protein ligase RNF19A	RNF19A
mun-novel31-3p	probable E3 ubiquitin-protein ligase RNF217	RNF217
mun-novel29-3p	mRNA cap guanine-N7 methyltransferase	RNMT
mun-novel72-3p	tyrosine-protein kinase transmembrane receptor ROR1	ROR1
mun-miR-2954-3p	nuclear receptor ROR-beta	RORB
mun-novel8-3p	nuclear receptor ROR-beta	RORB
mun-novel102-3p	replication protein A 70 kDa DNA-binding subunit	RPA1
mun-novel72-3p	replication protein A 70 kDa DNA-binding subunit	RPA1
mun-novel102-3p	replication protein A 32 kDa subunit	RPA2
mun-novel8-3p	replication protein A 32 kDa subunit	RPA2
mun-miR-203-5p	DNA-directed RNA polymerases I and III subunit RPAC1	RPAC1
mun-novel102-3p	DNA-directed RNA polymerase III subunit RPC8	RPC25
mun-novel29-3p	60S ribosomal protein L3	RPL3
mun-novel7-3p	60S ribosomal protein L37a	RPL37A
mun-novel7-3p	60S ribosomal protein L39	RPL39
mun-novel102-3p	dolichyl-diphosphooligosaccharide--protein glycosyltransferase subunit 2	RPN2
mun-novel7-3p	ribonuclease P protein subunit p38	RPP38
mun-novel72-3p	ras-related protein R-Ras2	RRAS2
mun-novel45-3p	ras-responsive element-binding protein 1	RREB1
mun-novel72-5p	ras-responsive element-binding protein 1	RREB1
mun-novel7-3p	ribonucleoside-diphosphate reductase subunit M2 B	RRM2B
mun-miR-2954-3p	ribosomal RNA-processing protein 7 A	RRP7A
mun-novel72-3p	ribosomal RNA-processing protein 7 A	RRP7A
mun-miR-194-5p	round spermatid basic protein 1-like protein	RSBN1L
mun-novel72-5p	probable ribosome biogenesis protein RLP24	RSL24D1
mun-novel66-3p	R-spondin-3	RSPO3
mun-miR-215-5p	RING finger and SPRY domain-containing protein 1	RSPRY1
mun-novel29-3p	RNA polymerase-associated protein RTF1	RTF1
mun-miR-194-5p	RUN and FYVE domain-containing protein 1	RUFY1
mun-novel8-3p	RUN and FYVE domain-containing protein 1	RUFY1
mun-novel45-3p	RUN domain-containing protein 3B	RUNDC3B
mun-novel8-3p	RWD domain-containing protein 4	RWDD4
mun-novel102-3p	tyrosine-protein kinase RYK	RYK
mun-novel72-3p	tyrosine-protein kinase RYK	RYK
mun-novel72-5p	tyrosine-protein kinase RYK	RYK
mun-novel72-5p	protein S100-A1	S100A1
mun-miR-194-5p	sal-like protein 1	SALL1
mun-novel31-3p	sal-like protein 1	SALL1
mun-miR-194-5p	sal-like protein 3	SALL3
mun-novel45-3p	sterile alpha motif domain-containing protein 12	SAMD12
mun-novel102-3p	DNA-binding protein SATB1	SATB1
mun-miR-194-5p	protein strawberry notch 1	SBNO1
mun-novel66-3p	protein SCAF8	SCAF8
mun-novel29-3p	protein SCAI	SCAI
mun-novel7-3p	neuroendocrine protein 7B2	SCG5
mun-novel7-3p	schwannomin-interacting protein 1	SCHIP1
mun-miR-2954-3p	sex comb on midleg-like protein 2	SCML2
mun-novel72-3p	sodium channel protein type 2 subunit alpha	SCN2A
mun-novel29-3p	short coiled-coil protein	SCOC
mun-novel72-3p	secernin-1	SCRN1
mun-novel29-3p	signal peptide, CUB and EGF-like domain-containing protein 1	SCUBE1
mun-novel72-5p	signal peptide, CUB and EGF-like domain-containing protein 2	SCUBE2
mun-novel72-3p	syndecan-1	SDC1
mun-novel102-3p	syndecan-4	SDC4
mun-novel31-3p	syndecan-4	SDC4
mun-miR-194-5p	syntenin-1	SDCBP
mun-miR-215-5p	syntenin-1	SDCBP
mun-novel68-3p	serologically defined colon cancer antigen 8	SDCCAG8
mun-novel7-3p	serologically defined colon cancer antigen 8	SDCCAG8
mun-novel7-3p	succinate dehydrogenase [ubiquinone] cytochrome b small subunit, mitochondrial	SDHD
mun-miR-375-3p	vesicle transport protein SEC20	SEC20
mun-novel102-3p	protein transport protein Sec31A	SEC31A
mun-novel45-3p	semaphorin-3A	SEMA3A
mun-novel8-3p	semaphorin-3A	SEMA3A
mun-novel68-3p	semaphorin-3D	SEMA3D
mun-novel46-3p	semaphorin-6D	SEMA6D
mun-novel66-3p	semaphorin-6D	SEMA6D
mun-novel45-3p	sentrin-specific protease 6	SENP6
mun-novel102-3p	septin-11	SEPT11
mun-novel45-3p	neuronal-specific septin-3	SEPT3
mun-novel45-3p	septin-6	SEPT6
mun-miR-215-5p	septin-7	SEPT7
mun-novel7-3p	small EDRK-rich factor 1	SERF1A
mun-novel8-3p	serine hydrolase-like protein 2	SERHL2
mun-miR-2954-3p	serine incorporator 3	SERINC3
mun-novel102-3p	serine incorporator 3	SERINC3
mun-novel29-3p	serine incorporator 3	SERINC3
mun-novel29-3p	glia-derived nexin	SERPINE2
mun-miR-203-5p	SERTA domain-containing protein 2	SERTAD2
mun-novel29-3p	sestrin-1	SESN1
mun-novel46-3p	protein SET	SET
mun-novel72-3p	histone-lysine N-methyltransferase setd3	SETD3
mun-novel102-3p	N-lysine methyltransferase SETD6	SETD6
mun-novel7-3p	SH3 domain-binding glutamic acid-rich-like protein 3	SH3BGRL3
mun-novel72-3p	SH3 domain-binding glutamic acid-rich-like protein 3	SH3BGRL3
mun-miR-194-5p	endophilin-B2	SH3GLB2
mun-novel72-3p	endophilin-B2	SH3GLB2
mun-miR-375-3p	E3 ubiquitin-protein ligase SH3RF1	SH3RF1
mun-novel102-3p	SH3 domain-containing RING finger protein 3	SH3RF3
mun-novel102-3p	SHC-transforming protein 4	SHC4
mun-novel68-3p	SH2 domain-containing adapter protein F	SHF
mun-novel7-3p	leucine-rich repeat protein SHOC-2	SHOC2
mun-novel7-3p	protein Shroom3	SHROOM3
mun-novel66-3p	S-phase kinase-associated protein 1	SKP1
mun-novel7-3p	S-phase kinase-associated protein 1	SKP1
mun-novel68-3p	SLAIN motif-containing protein 2	SLAIN2
mun-novel45-3p	solute carrier family 12 member 4	SLC12A4
mun-novel72-3p	solute carrier family 13 member 5	SLC13A5
mun-novel102-3p	MFS-type transporter SLC18B1	SLC18B1
mun-miR-2954-3p	excitatory amino acid transporter 1	SLC1A3
mun-novel7-3p	excitatory amino acid transporter 1	SLC1A3
mun-novel7-3p	sodium/potassium/calcium exchanger 1	SLC24A1
mun-novel102-3p	sodium/potassium/calcium exchanger 4	SLC24A4
mun-novel72-3p	sodium/potassium/calcium exchanger 4	SLC24A4
mun-novel7-3p	mitoferrin-2	SLC25A28
mun-novel102-3p	solute carrier family 25 member 51	SLC25A5
mun-novel66-3p	ADP/ATP translocase 3	SLC25A6
mun-novel7-3p	prestin	SLC26A5
mun-novel29-3p	long-chain fatty acid transport protein 4	SLC27A4
mun-novel72-5p	long-chain fatty acid transport protein 4	SLC27A4
mun-novel8-3p	zinc transporter 1	SLC30A1
mun-novel45-3p	zinc transporter 9	SLC30A9
mun-novel31-3p	high affinity copper uptake protein 1	SLC31A1
mun-novel66-3p	CMP-sialic acid transporter	SLC35A1
mun-novel72-5p	adenosine 3'-phospho 5'-phosphosulfate transporter 2	SLC35B3
mun-novel72-5p	solute carrier family 35 member E1	SLC35E1
mun-novel8-3p	solute carrier family 35 member F5	SLC35F5
mun-novel8-3p	solute carrier family 35 member G2	SLC35G2
mun-novel45-3p	putative sodium-coupled neutral amino acid transporter 9	SLC38A9
mun-miR-194-5p	zinc transporter ZIP13	SLC39A13
mun-novel7-3p	zinc transporter ZIP13	SLC39A13
mun-novel46-3p	large neutral amino acids transporter small subunit 4	SLC43A2
mun-novel7-3p	large neutral amino acids transporter small subunit 4	SLC43A2
mun-novel72-5p	large neutral amino acids transporter small subunit 4	SLC43A2
mun-novel66-3p	sodium- and chloride-dependent GABA transporter 2	SLC6A13
mun-novel68-3p	sodium-dependent noradrenaline transporter	SLC6A2
mun-novel72-3p	pre-mRNA-splicing factor SLU7	SLU7
mun-miR-2954-3p	mothers against decapentaplegic 3	SMAD3
mun-novel7-3p	stromal membrane-associated protein 2	SMAP2
mun-novel31-3p	serine/threonine-protein kinase SMG1	SMG1
mun-novel7-3p	serine/threonine-protein kinase SMG1	SMG1
mun-novel72-3p	serine/threonine-protein kinase SMG1	SMG1
mun-novel45-3p	protein SMG7	SMG7
mun-miR-194-5p	protein SMG8	SMG8
mun-novel8-3p	small integral membrane protein 11	SMIM11
mun-novel7-3p	small integral membrane protein 13	SMIM13
mun-miR-194-5p	small integral membrane protein 14	SMIM14
mun-novel31-3p	small integral membrane protein 4	SMIM4
mun-novel7-3p	small integral membrane protein 4	SMIM4
mun-novel102-3p	N-lysine methyltransferase SMYD2	SMYD2
mun-novel72-3p	N-lysine methyltransferase SMYD2	SMYD2
mun-novel45-3p	zinc finger protein SNAI2	SNAI2
mun-novel29-3p	clathrin coat assembly protein AP180	SNAP91
mun-novel29-3p	alpha-synuclein	SNCA
mun-novel7-3p	beta-synuclein	SNCB
mun-novel68-3p	gamma-synuclein	SNCG
mun-novel8-3p	gamma-synuclein	SNCG
mun-novel72-3p	SNF-related serine/threonine-protein kinase	SNRK
mun-novel68-3p	beta-1-syntrophin	SNTB1
mun-novel8-3p	gamma-1-syntrophin	SNTG1
mun-miR-194-5p	sorting nexin-10	SNX10
mun-novel45-3p	sorting nexin-10	SNX10
mun-novel72-3p	sorting nexin-16	SNX16
mun-novel7-3p	sorting nexin-33	SNX33
mun-novel31-3p	sorting nexin-4	SNX4
mun-novel72-3p	sorting nexin-4	SNX4
mun-novel29-3p	sorting nexin-7	SNX7
mun-novel7-3p	sorting nexin-7	SNX7
mun-novel8-3p	sorting nexin-8	SNX8
mun-novel45-3p	suppressor of cytokine signaling 5	SOCS5
mun-miR-2954-3p	suppressor of cytokine signaling 6	SOCS6
mun-novel45-3p	suppressor of cytokine signaling 6	SOCS6
mun-novel72-3p	suppressor of cytokine signaling 6	SOCS6
mun-novel36-3p	protein SOGA3	SOGA3
mun-novel102-3p	sorbin and SH3 domain-containing protein 2	SORBS2
mun-miR-215-5p	sortilin-related receptor	SORL1
mun-novel66-3p	transcription factor SOX-10	SOX10
mun-novel45-3p	SPARC	SPARC
mun-novel29-3p	spermatogenesis-associated protein 2	SPATA2
mun-novel31-3p	spermatogenesis-associated protein 2	SPATA2
mun-miR-194-5p	spermatogenesis-defective protein 39	SPATA39
mun-novel66-3p	spermatogenesis-associated protein 7	SPATA7
mun-novel102-3p	signal peptidase complex subunit 3	SPC22
mun-novel102-3p	paraplegin	SPG7
mun-novel102-3p	transcription factor PU.1	SPI1
mun-novel72-3p	signal peptide peptidase-like 3	SPPL3
mun-novel102-3p	sprouty-related, EVH1 domain-containing protein 1	SPRED1
mun-novel7-3p	sprouty-related, EVH1 domain-containing protein 2	SPRED2
mun-novel45-3p	transcription elongation factor SPT4	SPT4
mun-novel68-3p	transcription elongation factor SPT4	SPT4
mun-novel7-3p	transcription elongation factor SPT4	SPT4
mun-novel72-5p	transcription elongation factor SPT4	SPT4
mun-novel46-3p	serine palmitoyltransferase 2	SPTLC2
mun-novel72-3p	serine palmitoyltransferase 2	SPTLC2
mun-miR-194-5p	splicing regulatory glutamine/lysine-rich protein 1	SREK1
mun-novel7-3p	serum response factor	SRF
mun-novel68-3p	SLIT-ROBO Rho GTPase-activating protein 1	SRGAP1
mun-novel24-5p	spermidine synthase	SRM
mun-novel29-3p	spermidine synthase	SRM
mun-novel68-3p	spermidine synthase	SRM
mun-novel7-3p	spermidine synthase	SRM
mun-miR-2954-3p	signal recognition particle 14 kDa protein	SRP14
mun-novel45-3p	signal recognition particle 54 kDa protein	SRP54
mun-novel102-3p	signal recognition particle subunit SRP72	SRP72
mun-miR-203-5p	SRSF protein kinase 2	SRPK2
mun-miR-2954-3p	serine/arginine-rich splicing factor 10	SRSF10
mun-novel46-3p	serine/arginine-rich splicing factor 10	SRSF10
mun-novel8-3p	serine/arginine-rich splicing factor 10	SRSF10
mun-miR-2954-3p	serine/arginine-rich splicing factor 11	SRSF11
mun-novel31-3p	serine/arginine-rich splicing factor 2	SRSF2
mun-novel45-3p	lupus La protein	SSB
mun-novel66-3p	lupus La protein	SSB
mun-novel102-3p	single-stranded DNA-binding protein 3	SSBP3
mun-novel72-3p	sperm-specific antigen 2	SSFA2
mun-miR-194-5p	protein SSXT	SSXT
mun-novel29-3p	protein SSXT	SSXT
mun-miR-203-5p	suppression of tumorigenicity 5 protein	ST5
mun-novel31-3p	suppression of tumorigenicity 5 protein	ST5
mun-novel102-3p	beta-galactoside alpha-2,6-sialyltransferase 2	ST6GAL1
mun-novel66-3p	beta-galactoside alpha-2,6-sialyltransferase 2	ST6GAL1
mun-novel45-3p	cohesin subunit SA-1	STAG1
mun-novel72-3p	cohesin subunit SA-2	STAG2
mun-novel66-3p	double-stranded RNA-binding protein Staufen 2	STAU2
mun-novel46-3p	serine/threonine-protein kinase 24	STK24
mun-novel8-3p	serine/threonine-protein kinase 24	STK24
mun-novel46-3p	stathmin-2	STMN2
mun-novel7-3p	stathmin-4	STMN4
mun-novel72-5p	stathmin-4	STMN4
mun-novel8-3p	stonin-2	STON2
mun-novel8-3p	serine-threonine kinase receptor-associated protein	STRAP
mun-novel45-3p	striatin	STRN
mun-novel102-3p	syntaxin-2	STX2
mun-novel7-3p	serine/threonine/tyrosine-interacting protein	STYX
mun-miR-2954-3p	SUN domain-containing ossification factor	SUCO
mun-novel102-3p	SUN domain-containing ossification factor	SUCO
mun-novel29-3p	sin3 histone deacetylase corepressor complex component SDS3	SUDS3
mun-novel8-3p	sin3 histone deacetylase corepressor complex component SDS3	SUDS3
mun-miR-2954-3p	suppressor of G2 allele of SKP1	SUGT1
mun-miR-2954-3p	extracellular sulfatase Sulf-1	SULF1
mun-miR-194-5p	small ubiquitin-related modifier 2	SUMO2
mun-novel7-3p	small ubiquitin-related modifier 2	SUMO2
mun-novel8-3p	transcription initiation protein SPT3	SUPT3H
mun-novel29-3p	surfeit locus protein 1	SURF1
mun-miR-2954-3p	sushi domain-containing protein 4	SUSD4
mun-miR-2954-3p	histone-lysine N-methyltransferase SUV39H2	SUV39H2
mun-novel29-3p	histone-lysine N-methyltransferase SUV420H1	SUV420H1
mun-miR-194-5p	polycomb protein SUZ12	SUZ12
mun-novel72-3p	supervillin	SVIL
mun-miR-194-5p	heterogeneous nuclear ribonucleoprotein Q	SYNCRIP
mun-novel29-3p	heterogeneous nuclear ribonucleoprotein Q	SYNCRIP
mun-novel66-3p	heterogeneous nuclear ribonucleoprotein Q	SYNCRIP
mun-novel66-3p	synaptogyrin-1	SYNGR1
mun-novel72-5p	synaptotagmin-1	SYT1
mun-novel45-3p	brachyury protein	T Gene
mun-novel29-3p	protachykinin-1	TAC1
mun-miR-215-5p	transcription initiation factor TFIID subunit 1	TAF1
mun-novel72-3p	transcription initiation factor TFIID subunit 11	TAF11
mun-novel7-3p	transcription initiation factor TFIID subunit 2	TAF2
mun-novel45-3p	transcription initiation factor TFIID subunit 4	TAF4
mun-novel29-3p	transcription initiation factor TFIID subunit 5	TAF5
mun-novel45-3p	transcription initiation factor TFIID subunit 5	TAF5
mun-novel29-3p	DNA-3-methyladenine glycosylase	TAG
mun-novel46-3p	mitochondrial translocator assembly and maintenance protein 41	TAMM41
mun-novel72-5p	serine/threonine-protein kinase TAO3	TAOK3
mun-miR-2954-3p	probable methyltransferase TARBP1	TARBP1
mun-novel7-3p	TAR DNA-binding protein 43	TARDBP
mun-novel45-3p	threonine aspartase 1	TASP1
mun-novel46-3p	threonine aspartase 1	TASP1
mun-novel8-3p	threonine aspartase 1	TASP1
mun-miR-2954-3p	TBC1 domain family member 1	TBC1D1
mun-novel72-3p	TBC1 domain family member 13	TBC1D13
mun-novel46-3p	TBC1 domain family member 8	TBC1D8
mun-novel66-3p	TBC1 domain family member 9B	TBC1D9B
mun-novel72-5p	tubulin-specific chaperone E	TBCE
mun-novel72-5p	F-box-like/WD repeat-containing protein TBL1X	TBL1X
mun-novel29-3p	F-box-like/WD repeat-containing protein TBL1XR1	TBL1XR1
mun-novel102-3p	TATA-box-binding protein	TBP
mun-novel31-3p	TATA-box-binding protein	TBP
mun-novel8-3p	T-box transcription factor TBX5	TBX5
mun-novel8-3p	transcription factor 12	TCF12
mun-miR-203-5p	tectonic-2	TCTN2
mun-novel36-3p	tyrosyl-DNA phosphodiesterase 1	TDP1
mun-novel72-5p	tudor domain-containing protein 3	TDRD3
mun-novel7-3p	angiopoietin-1 receptor	TEK
mun-novel36-3p	methylcytosine dioxygenase TET2	TET2
mun-novel45-3p	methylcytosine dioxygenase TET2	TET2
mun-novel8-3p	methylcytosine dioxygenase TET2	TET2
mun-novel72-3p	transcription factor Dp-1	TFDP1
mun-novel68-3p	protein TFG	TFG
mun-novel8-3p	protein TFG	TFG
mun-miR-203-5p	TGF-beta receptor type-1	TGFBR1
mun-novel45-3p	TGF-beta receptor type-2	TGFBR2
mun-miR-2954-3p	THAP domain-containing protein 4	THAP4
mun-novel72-3p	thyroid hormone receptor-associated protein 3	THRAP3
mun-novel45-3p	thrombospondin type-1 domain-containing protein 4	THSD4
mun-novel45-3p	thrombospondin type-1 domain-containing protein 7B	THSD7B
mun-novel36-3p	THUMP domain-containing protein 3	THUMPD3
mun-miR-215-5p	nucleolysin TIAR	TIAL1
mun-novel72-3p	T-lymphoma invasion and metastasis-inducing protein 1	TIAM1
mun-novel66-3p	T-lymphoma invasion and metastasis-inducing protein 2	TIAM2
mun-novel8-3p	T-lymphoma invasion and metastasis-inducing protein 2	TIAM2
mun-miR-194-5p	mitochondrial import inner membrane translocase subunit TIM14	TIMM14
mun-novel102-3p	mitochondrial import inner membrane translocase subunit Tim22	TIMM22
mun-novel72-3p	mitochondrial import inner membrane translocase subunit Tim22	TIMM22
mun-miR-194-5p	mitochondrial import inner membrane translocase subunit Tim23	TIMM23
mun-novel66-3p	mitochondrial import inner membrane translocase subunit Tim23	TIMM23
mun-novel31-3p	mitochondrial import inner membrane translocase subunit Tim9	TIMM9
mun-novel29-3p	metalloproteinase inhibitor 3	TIMP3
mun-novel36-3p	tight junction protein ZO-1	TJP1
mun-novel7-3p	tight junction protein ZO-1	TJP1
mun-novel68-3p	tight junction protein ZO-2	TJP2
mun-miR-2954-3p	transducin-like enhancer protein 1	TLE1
mun-novel36-3p	transforming growth factor beta-3	TLE3
mun-miR-2954-3p	transducin-like enhancer protein 4	TLE4
mun-miR-2954-3p	serine/threonine-protein kinase tousled-like 2	TLK2
mun-novel7-3p	tolloid-like protein 2	TLL2
mun-novel72-5p	TM2 domain-containing protein 1	TM2D1
mun-novel102-3p	transmembrane 6 superfamily member 1	TM6SF1
mun-novel72-5p	transmembrane 6 superfamily member 1	TM6SF1
mun-miR-2954-3p	transmembrane 9 superfamily member 3	TM9SF3
mun-novel102-3p	protein lifeguard 3	TMBIM1
mun-novel29-3p	transmembrane and coiled-coil domains protein 1	TMCC1
mun-novel45-3p	transmembrane and coiled-coil domains protein 1	TMCC1
mun-novel102-3p	transmembrane and coiled-coil domains protein 2	TMCC2
mun-novel72-3p	transmembrane and coiled-coil domains protein 2	TMCC2
mun-novel31-3p	promethin	TMEM159
mun-novel102-3p	transmembrane protein 165	TMEM165
mun-novel72-3p	transmembrane protein 165	TMEM165
mun-novel7-3p	transmembrane protein 175	TMEM175
mun-novel72-5p	transmembrane protein 180	TMEM180
mun-novel72-3p	transmembrane protein 196	TMEM196
mun-novel8-3p	transmembrane protein 196	TMEM196
mun-novel7-3p	transmembrane protein 206	TMEM206
mun-novel72-5p	transmembrane protein 222	TMEM222
mun-novel7-3p	transmembrane protein 229B	TMEM229B
mun-novel45-3p	transmembrane protein 233	TMEM233
mun-novel72-5p	transmembrane protein 243	TMEM243
mun-miR-194-5p	cell cycle control protein 50A	TMEM30A
mun-novel46-3p	transmembrane protein 41A	TMEM41A
mun-novel102-3p	transmembrane protein 47	TMEM47
mun-novel72-3p	transmembrane protein 47	TMEM47
mun-novel102-3p	transmembrane protein 50B	TMEM50B
mun-novel72-3p	transmembrane protein 50B	TMEM50B
mun-novel102-3p	transmembrane protein 65	TMEM65
mun-novel29-3p	mitochondrial inner membrane protein	TMEM65
mun-novel72-3p	mitochondrial inner membrane protein	TMEM65
mun-novel72-3p	transmembrane protein 65	TMEM65
mun-novel31-3p	tropomodulin-3	TMOD3
mun-novel45-3p	lamina-associated polypeptide 2, isoforms beta/delta/epsilon/gamma	TMPO
mun-novel29-3p	thymosin beta-15A	TMSB15A
mun-novel72-5p	thymosin beta-15A	TMSB15A
mun-novel7-3p	thymosin beta-4	TMSB4
mun-novel31-3p	transmembrane and TPR repeat-containing protein 1	TMTC1
mun-novel68-3p	tumor necrosis factor receptor superfamily member 11B	TNFRSF11B
mun-novel7-3p	tumor necrosis factor receptor superfamily member 21	TNFRSF21
mun-miR-194-5p	traf2 and NCK-interacting protein kinase	TNIK
mun-miR-2954-3p	traf2 and NCK-interacting protein kinase	TNIK
mun-novel45-3p	traf2 and NCK-interacting protein kinase	TNIK
mun-miR-2954-3p	activated CDC42 kinase 1	TNK2
mun-novel102-3p	transportin-1	TNPO1
mun-novel7-3p	transportin-1	TNPO1
mun-novel72-3p	mitochondrial import receptor subunit TOM6	TOM6
mun-novel7-3p	torsin-1A	TOR1A
mun-novel8-3p	TOX high mobility group box family member 3	TOX3
mun-novel46-3p	trophoblast glycoprotein	TPBG
mun-miR-194-5p	tripeptidyl-peptidase 2	TPP2
mun-novel72-3p	tripeptidyl-peptidase 2	TPP2
mun-novel45-3p	metalloprotease TIKI2	TRABD2B
mun-novel8-3p	adapter protein CIKS	TRAF3IP2
mun-novel68-3p	heat shock protein 75 kDa, mitochondrial	TRAP1
mun-novel8-3p	trafficking protein particle complex subunit 10	TRAPPC10
mun-novel66-3p	trafficking protein particle complex subunit 11	TRAPPC11
mun-novel7-3p	trafficking protein particle complex subunit 11	TRAPPC11
mun-novel66-3p	tribbles 2	TRIB2
mun-miR-2954-3p	probable E3 ubiquitin-protein ligase TRIM8	TRIM8
mun-novel102-3p	triple functional domain protein	TRIO
mun-novel45-3p	tRNA methyltransferase 10 A	TRMT10A
mun-novel31-3p	tRNA (adenine(58)-N(1))-methyltransferase catalytic subunit TRMT61A	TRMT61A
mun-novel8-3p	transient receptor potential cation channel subfamily M member 7	TRPM7
mun-novel7-3p	tumor susceptibility gene 101 protein	TSG101
mun-novel102-3p	tetraspanin-7	TSPAN7
mun-novel72-3p	thiosulfate sulfurtransferase/rhodanese-like domain-containing protein 3	TSTD3
mun-novel29-3p	tetratricopeptide repeat protein 1	TTC1
mun-novel8-3p	tetratricopeptide repeat protein 1	TTC1
mun-novel31-3p	tetratricopeptide repeat protein 17	TTC17
mun-novel7-3p	tetratricopeptide repeat protein 17	TTC17
mun-novel72-3p	tetratricopeptide repeat protein 21B	TTC21B
mun-novel31-3p	tetratricopeptide repeat protein 37	TTC37
mun-miR-194-5p	tetratricopeptide repeat protein 7B	TTC7B
mun-novel45-3p	tetratricopeptide repeat protein 9A	TTC9A
mun-novel66-3p	tetratricopeptide repeat protein 9A	TTC9A
mun-novel45-3p	tubulin--tyrosine ligase	TTL
mun-novel68-3p	tubby protein	TUB
mun-novel24-5p	gamma-tubulin complex component 3	TUBGCP3
mun-novel46-3p	gamma-tubulin complex component 3	TUBGCP3
mun-novel102-3p	gamma-tubulin complex component 6	TUBGCP6
mun-miR-2954-3p	tubby-related protein 3	TULP3
mun-novel72-3p	Golgi apparatus membrane protein TVP23 B	TVP23B
mun-novel46-3p	thioredoxin, mitochondrial	TXN2
mun-novel7-3p	thioredoxin, mitochondrial	TXN2
mun-novel66-3p	thioredoxin domain-containing protein 12	TXNDC12
mun-novel7-3p	thioredoxin domain-containing protein 12	TXNDC12
mun-novel29-3p	thioredoxin domain-containing protein 17	TXNDC17
mun-novel102-3p	thymidylate synthase	TYMS
mun-miR-194-5p	tyrosine-protein kinase receptor TYRO3	TYRO3
mun-novel45-3p	SUMO-activating enzyme subunit 2	UBA2
mun-novel102-3p	ubiquitin-associated domain-containing protein 2	UBAC2
mun-novel45-3p	polyubiquitin-B	UBB
mun-novel45-3p	polyubiquitin-B	UBB
mun-novel36-3p	ubiquitin-conjugating enzyme E2 D1	UBE2D1
mun-novel102-3p	ubiquitin-conjugating enzyme E2 G1	UBE2G1
mun-novel45-3p	ubiquitin-conjugating enzyme E2 G1	UBE2G1
mun-novel72-3p	ubiquitin-conjugating enzyme E2 G1	UBE2G1
mun-miR-375-3p	ubiquitin-conjugating enzyme E2 H	UBE2H
mun-novel102-3p	ubiquitin-conjugating enzyme E2 H	UBE2H
mun-novel72-3p	ubiquitin-conjugating enzyme E2 H	UBE2H
mun-miR-194-5p	SUMO-conjugating enzyme UBC9	UBE2I
mun-novel102-3p	SUMO-conjugating enzyme UBC9	UBE2I
mun-novel72-3p	ubiquitin-conjugating enzyme E2 K	UBE2K
mun-novel29-3p	ubiquitin-conjugating enzyme E2 L3	UBE2L3
mun-novel66-3p	ubiquitin-conjugating enzyme E2 L3	UBE2L3
[truncated: 145 more rows]
