# Supplementary material for: miRNAome expression profiles in the gonads of adult Melopsittacus undulatus
Source: PeerJ. 2018 Apr 9;6:e4615. doi: 10.7717/peerj.4615 (PMC5896495; doi:10.7717/peerj.4615)
Supplement: Table S5 [file peerj-06-4615-s005.xlsx]

## Sheet: Sheet1
Supplemental Table S5. The list of GO enrichment analysis on sex-related, vocal-related or learning related GO term.
GO_id	GO_term	GO_category	GO_rank	Gene Symbol (miRNA)	Fold_enrichment	Pvalue	FDR
GO:0007565	female pregnancy	biological_process	4	FKBP4(mun-novel7-3p, mun-novel72-3p), MED1(mun-novel68-3p), C1QBP(mun-novel68-3p), VMP1(mun-novel72-3p), AKT1(mun-novel7-3p),	0.731656	0.902	1
GO:0007292	female gamete generation	biological_process	5	BMPR1B(mun-novel8-3p, mun-novel66-3p),ADAMTS1(mun-novel102-3p)	0.345874	0.999	1
GO:0046660	female sex differentiation	biological_process	5	TAF4(mun-novel45-3p),DACH1(mun-miR-203-5p, mun-novel29-3p),LHX9(mun-novel8-3p, mun-novel72-3p),BMPR1B(mun-novel8-3p, mun-novel66-3p),TYRO3(mun-miR-194-5p),KIT(mun-miR-194-5p),ADAMTS1(mun-novel102-3p),PHB2(mun-novel68-3p, mun-miR-194-5p),EIF2B2(mun-novel68-3p),MED1(mun-novel68-3p),DACH2(mun-novel102-3p),CHD7(mun-novel72-3p),EIF2B2(mun-novel66-3p),AK8(mun-novel45-3p),PDGFRA(mun-novel31-3p, mun-nove…	0.776451	0.901	1
GO:0060135	maternal process involved in female pregnancy	biological_process	5	MED1(mun-novel68-3p),AKT1(mun-novel7-3p)	0.699377	0.871	1
GO:0046545	development of primary female sexual characteristics	biological_process	6	TAF4(mun-novel45-3p),DACH1(mun-miR-203-5p, mun-novel29-3p),LHX9(mun-novel8-3p, mun-novel72-3p),BMPR1B(mun-novel8-3p, mun-novel66-3p),TYRO3(mun-miR-194-5p),KIT(mun-miR-194-5p),ADAMTS1(mun-novel102-3p),EIF2B2(mun-novel68-3p),DACH2(mun-novel102-3p),CHD7(mun-novel72-3p),EIF2B2(mun-novel66-3p),AK8(mun-novel45-3p),PDGFRA(mun-novel31-3p, mun-novel45-3p)	0.731656	0.932	1
GO:0046543	development of secondary female sexual characteristics	biological_process	6	PHB2(mun-novel68-3p, mun-miR-194-5p),MED1(mun-novel68-3p)	0.951152	0.655	0.934
GO:0030540	female genitalia development	biological_process	8	TYRO3(mun-miR-194-5p),CHD7(mun-novel72-3p)	0.45293	0.954	1
GO:0008585	female gonad development	biological_process	8	TAF4(mun-novel45-3p),LHX9(mun-novel8-3p, mun-novel72-3p),BMPR1B(mun-novel8-3p, mun-novel66-3p),KIT(mun-miR-194-5p),ADAMTS1(mun-novel102-3p),EIF2B2(mun-novel68-3p)AK8(mun-novel45-3p),PDGFRA(mun-novel31-3p, mun-novel45-3p)	0.689241	0.937	1
GO:0001939	female pronucleus	cellular_component	9	TBP(mun-novel31-3p, mun-novel102-3p)	1.33644	0.461	0.849
GO:0048232	male gamete generation	biological_process	5	HOOK1(mun-novel72-3p),DLD(mun-novel46-3p),JAM3(mun-novel10-3p, mun-novel15-3p),HSF2(mun-novel68-3p),NME5(mun-novel8-3p),TYRO3(mun-miR-194-5p),KIT(mun-miR-194-5p),KDM2B(mun-miR-194-5p),PRDX4(mun-miR-215-5p),GGNBP2(mun-novel72-3p),GATA4(mun-novel72-3p),NR0B1(mun-novel72-3p),HERC4(mun-novel7-3p),CELF1(mun-novel7-3p),ACVR2A(mun-novel7-3p),LIS1(mun-novel66-3p),MAP7(mun-novel36-3p),INPP5B(mun-novel45-3…	0.869625	0.839	0.996
GO:0030238	male sex determination	biological_process	5	FGF9(mun-novel72-5p),NR0B1(mun-novel72-3p)	0.792627	0.753	0.968
GO:0046661	male sex differentiation	biological_process	5	LHX9(mun-novel8-3p, mun-novel72-3p),FGF9(mun-novel72-5p),KITLG(mun-miR-2954-3p, mun-novel72-3p),KIT(mun-miR-194-5p),FKBP4(mun-novel7-3p, mun-novel72-3p),PRDX4(mun-miR-215-5p),GATA4(mun-novel72-3p),NR0B1(mun-novel72-3p),ACVR2A(mun-novel7-3p),MAP7(mun-novel36-3p),PDGFRA(mun-novel31-3p, mun-novel45-3p)	0.644009	0.978	1
GO:0046546	development of primary male sexual characteristics	biological_process	6	LHX9(mun-novel8-3p, mun-novel72-3p),FGF9(mun-novel72-5p),KITLG(mun-miR-2954-3p, mun-novel72-3p),KIT(mun-miR-194-5p),PRDX4(mun-miR-215-5p),GATA4(mun-novel72-3p),NR0B1(mun-novel72-3p),ACVR2A(mun-novel7-3p),MAP7(mun-novel36-3p),PDGFRA(mun-novel31-3p, mun-novel45-3p)	0.587791	0.988	1
GO:0002176	male germ cell proliferation	biological_process	6	PRDX4(mun-miR-215-5p)	0.951152	0.693	0.944
GO:0060179	male mating behavior	biological_process	6	GRIN1(mun-miR-2954-3p, mun-novel8-3p)	2.37788	0.0661	0.317
GO:2000254	regulation of male germ cell proliferation	biological_process	7	PRDX4(mun-miR-215-5p)	2.37788	0.376	0.75
GO:0030539	male genitalia development	biological_process	8	PDGFRA(mun-novel31-3p, mun-novel45-3p)	0.45293	0.954	1
GO:0008584	male gonad development	biological_process	8	LHX9(mun-novel8-3p, mun-novel72-3p),FGF9(mun-novel72-5p),KITLG(mun-miR-2954-3p, mun-novel72-3p),KIT(mun-miR-194-5p),PRDX4(mun-miR-215-5p),GATA4(mun-novel72-3p),NR0B1(mun-novel72-3p),ACVR2A(mun-novel7-3p),MAP7(mun-novel36-3p),PDGFRA(mun-novel31-3p, mun-novel45-3p)	0.669826	0.949	1
GO:2000255	negative regulation of male germ cell proliferation	biological_process	8	PRDX4(mun-miR-215-5p)	4.75576	0.21	0.573
GO:0007140	male meiosis	biological_process	9	SUV39H2(mun-miR-2954-3p)	0.198157	0.997	1
GO:0001673	male germ cell nucleus	cellular_component	9	RPA1(mun-novel72-3p, mun-novel102-3p)	0.467755	0.91	1
GO:0001940	male pronucleus	cellular_component	9	TBP(mun-novel31-3p, mun-novel102-3p)	1.55918	0.378	0.752
GO:0045137	development of primary sexual characteristics	biological_process	5	TAF4(mun-novel45-3p),DACH1(mun-miR-203-5p, mun-novel29-3p),LHX9(mun-novel8-3p, mun-novel72-3p),BMPR1B(mun-novel8-3p, mun-novel66-3p),FGF9(mun-novel72-5p),TYRO3(mun-miR-194-5p),SALL1(mun-miR-194-5p, mun-novel31-3p),KITLG(mun-miR-2954-3p, mun-novel72-3p),KIT(mun-miR-194-5p),ADAMTS1(mun-novel102-3p),EIF2B2(mun-novel68-3p),DACH2(mun-novel102-3p),PRDX4(mun-miR-215-5p),CHD7(mun-novel72-3p),GATA4(mun-no…	0.752494	0.961	1
GO:0045136	development of secondary sexual characteristics	biological_process	5	PHB2(mun-novel68-3p, mun-miR-194-5p),MED1(mun-novel68-3p)	0.792627	0.753	0.968
GO:0034698	response to gonadotropin stimulus	biological_process	5	NSMF(mun-novel46-3p),GATA4(mun-novel72-3p)	1.18894	0.478	0.852
GO:0071371	cellular response to gonadotropin stimulus	biological_process	7	NSMF(mun-novel46-3p),GATA4(mun-novel72-3p)	1.29703	0.417	0.798
GO:0008406	gonad development	biological_process	7	TAF4(mun-novel45-3p),LHX9(mun-novel8-3p, mun-novel72-3p),BMPR1B(mun-novel8-3p, mun-novel66-3p),FGF9(mun-novel72-5p),SALL1(mun-miR-194-5p, mun-novel31-3p),KITLG(mun-miR-2954-3p, mun-novel72-3p),KIT(mun-miR-194-5p),ADAMTS1(mun-novel102-3p),EIF2B2(mun-novel68-3p),PRDX4(mun-miR-215-5p),GATA4(mun-novel72-3p),NR0B1(mun-novel72-3p),ACVR2A(mun-novel7-3p),RDH10(mun-novel29-3p),EIF2B2(mun-novel66-3p),MAP7(…	0.767058	0.931	1
GO:0001739	sex chromatin	cellular_component	14	SUZ12(mun-miR-194-5p),RING2(mun-novel102-3p, mun-novel45-3p, mun-novel72-3p)	1.87102	0.291	0.696
GO:0042297	vocal learning	biological_process	8	FOXP1(mun-miR-2954-3p, mun-novel102-3p, mun-novel45-3p),FOXP2(mun-miR-203-5p, mun-novel102-3p, mun-novel36-3p, mun-novel7-3p)	4.07637	4.33e-07	2.82e-05
GO:0071625	vocalization behavior	biological_process	5	FOXP1(mun-miR-2954-3p, mun-novel102-3p, mun-novel45-3p)	1.18894	0.611	0.904
GO:0008306	associative learning	biological_process	8	GRIN1(mun-miR-2954-3p, mun-novel8-3p),HIF1A(mun-novel45-3p, mun-novel68-3p),HMGCR(mun-miR-2954-3p),RELN(mun-novel102-3p),APP(mun-novel24-5p, mun-novel7-3p),SRF(mun-novel7-3p),	1.04788	0.476	0.852
GO:0007612	learning	biological_process	7	VDAC1(mun-novel102-3p),CNTN2(mun-novel10-3p, mun-novel15-3p),GRIN1(mun-miR-2954-3p, mun-novel8-3p),FOXP1(mun-miR-2954-3p, mun-novel102-3p, mun-novel45-3p),FVDAC3(mun-novel8-3p),FOXP2(mun-miR-203-5p, mun-novel102-3p, mun-novel36-3p, mun-novel7-3p),HIF1A(mun-novel45-3p, mun-novel68-3p),HMGCR(mun-miR-2954-3p),CHST10(mun-novel102-3p, mun-novel72-3p),RELN(mun-novel102-3p),FGF13(mun-miR-215-5p),APP(mun…	1.6005	0.00183	0.0246
GO:0007611	learning or memory	biological_process	6	VDAC1(mun-novel102-3p),CNTN2(mun-novel10-3p, mun-novel15-3p),GRIN1(mun-miR-2954-3p, mun-novel8-3p),FOXP1(mun-miR-2954-3p, mun-novel102-3p, mun-novel45-3p),VDAC3(mun-novel8-3p),CAMK4(mun-miR-2954-3p, mun-novel8-3p),PRKAR1B(mun-novel72-5p),ITGA8(mun-novel72-5p),FOXP2(mun-miR-203-5p, mun-novel102-3p, mun-novel36-3p, mun-novel7-3p),GRIA1(mun-miR-203-5p),HIF1A(mun-novel45-3p, mun-novel68-3p),PLK2(mun-…	1.77958	1.88e-06	0.000101
GO:0008355	olfactory learning	biological_process	9	GRIN1(mun-miR-2954-3p, mun-novel8-3p),	1.58525	0.37	0.75
GO:0008542	visual learning	biological_process	9	GRIN1(mun-miR-2954-3p, mun-novel8-3p),HIF1A(mun-novel45-3p, mun-novel68-3p),HMGCR(mun-miR-2954-3p),APP(mun-novel24-5p, mun-novel7-3p)	1.16252	0.341	0.75
